# Supplementary material for: Resistance to the Antiproliferative In Vitro Effect of PI3K-Akt-mTOR Inhibition in Primary Human Acute Myeloid Leukemia Cells Is Associated with Altered Cell Metabolism
Source: Int J Mol Sci. 2018 Jan 27;19(2):382. doi: 10.3390/ijms19020382 (PMC5855604; doi:10.3390/ijms19020382)
Supplement: Supplementary file 1 [file ijms-19-00382-s001.xlsx]

## Sheet: Metabolome
Metabolite	AB-res 8/10-01	ELM-57 8/04-02	GB-58 4/01-08	GIV-72 17/04-07	HJ-33 3/01-07	HPJ 31/01-01	JGR-51 23/02-09	KGM 12/02-01	KK 12/08-02	KR-35 21/11-06	KSS-49 11/05-09	LKKJ-45 16/11-07	RH 31/07-03	SKK 20/09-06	THL 21/01-01	AA-40 12/04-07	AS-28 24/11-06	AUI-85 24/02-09	BSD-40 19/02-10	ECLØ-64 14/04-10	EHJ-45 19/02-10	HH-26 18/04-08	JEN-56 29/06-09	JF-72 4/05-06	KHL-71 16/02-07	MC-78 14/04-08	NHN-35 2/11-09	PMah 7/02-05	SL 4/11-05	TWH-31 3/10-08
1,2-di-(9Z-octadecenoyl)-sn-glycero-3-phospho-(1'-myo-inositol)	0.10447	0.492847	0.154926	0.213682	0.0653316	0.0711456	0.0970107	0.0571936	0.28752	0.472814	0.00804225	0.161267	0.0383058	0.0368076	0.161057	0.0178902	0.245521	0.0451495	0.132439	0.0270461	0.0358049	0.257442	0.122178	0.350076	0.0207509	0.047996	0.270349	0.252295	0.462932	0.0627893
1003.489@1.4	0.0265246	0.187917	0.0479598	0.0384755	0.0165458	0.0131286	0.0171977	0.017224	0.0658032	0.147335	0.00524039	0.0321564	0.0100787	0.00722669	0.0554698	0.0075799	0.0289193	0.00746256	0.0203542	0.00602535	0.0108072	0.06972	0.0437296	0.196989	0.00698974	0.0129869	0.048697	0.0772299	0.209384	0.00773349
1005.525@2.9	0.0820439	0.239231	0.200222	0.137121	0.0665659	0.0464264	0.0593309	0.0636519	0.21289	0.370775	0.0116941	0.126617	0.0452193	0.0298123	0.13378	0.0200068	0.118492	0.0312764	0.108694	0.0283777	0.034915	0.198599	0.281251	0.943748	0.0174493	0.0592312	0.258332	0.1593	0.428396	0.0435726
1007.481@1.2	0.041462	0.162427	0.0446098	0.12077	0.0268317	0.0198582	0.0337197	0.0199024	0.084016	0.123586	0.00206176	0.0560529	0.0172017	0.00256607	0.0809306	0.00560001	0.0435323	0.00820961	0.0378427	0.0090917	0.00505519	0.0644266	0.0519745	0.231354	0.00396423	0.0113217	0.0678501	0.087462	0.133743	0.00479634
1008.239@6.1	0.211753	0.356143	0.1549	0.110161	0.129533	0.122729	0.105401	0.0808751	0.126833	0.0870588	0.0790421	0.100752	0.108235	0.109086	0.274723	0.0616606	0.103166	0.0894456	0.209154	0.0328752	0.0758805	0.0695042	0.108295	0.550549	0.0909484	0.103797	0.299605	0.238105	0.143835	0.129299
1014.524@3.5	0.083566	0.201939	0.118794	0.139575	0.0507936	0.0389645	0.0669888	0.0447208	0.12247	0.194882	0.0119032	0.0759646	0.039356	0.0221451	0.109429	0.0152262	0.0973763	0.0388663	0.0703142	0.0113681	0.0241135	0.094435	0.0705947	0.172394	0.0141137	0.039879	0.140496	0.138186	0.133154	0.0275771
1019.483@1.4	0.0352389	0.192116	0.0653874	0.13718	0.0185764	0.0106209	0.029646	0.0167097	0.0906796	0.144151	0.00547855	0.0461976	0.0209326	0.00540495	0.052938	0.0100519	0.0243209	0.00926221	0.0156971	0.00727496	0.00731468	0.0531008	0.073376	0.284777	0.00748389	0.01269	0.0861199	0.103816	0.290716	0.00872256
102.047@3.7	0.266008	0.849968	0.268579	0.250627	0.154051	0.306798	0.19001	0.100605	0.467941	0.682998	0.116522	0.138291	0.160567	0.108171	0.337604	0.104632	0.24955	0.123906	0.357158	0.0694972	0.288795	0.171978	0.444118	1.40393	0.230377	0.201119	0.449423	0.35492	1.08956	0.184583
1029.525@2.8	0.550826	1.80539	1.11167	0.698295	0.347501	0.238968	0.422416	0.364642	1.09648	1.62014	0.131876	0.76873	0.284733	0.180966	0.681892	0.156613	0.522178	0.239877	0.423322	0.125504	0.185656	0.619643	1.01648	2.81702	0.137048	0.316327	2.07148	1.12755	2.1509	0.253575
103.1@8.9	0.344681	0.417044	1.32218	0.837374	0.385543	0.831625	0.510658	0.227565	0.438246	0.896359	0.310721	0.386561	0.439005	0.493663	0.922619	0.320668	0.481849	0.442258	0.553743	0.121443	0.266412	0.341432	0.398531	0.340197	0.405028	0.749229	0.927911	0.75992	0.984146	0.61939
1030.361@0.7	0.041254	0.128987	0.0553193	0.0221797	0.0322505	0.0203149	0.0193285	0.029335	0.117409	0.163492	0.00545262	0.0605598	0.0179565	0.0123736	0.0945492	0.00475422	0.0461643	0.0195645	0.0416303	0.0152048	0.0143167	0.0572491	0.160692	0.262518	0.00620021	0.0147714	0.0833974	0.0680119	0.249859	0.0175862
1031.48@1.2	0.0479903	0.195061	0.0511409	0.0851007	0.027018	0.0147434	0.0318649	0.0215513	0.107664	0.151951	0.00298574	0.0418324	0.0157663	0.00546868	0.0896237	0.00488396	0.064739	0.0104456	0.0376312	0.00576254	0.00545529	0.0805994	0.071401	0.237254	0.00457432	0.0116269	0.0648373	0.0949397	0.187114	0.00556847
1031.541@2.8	0.45872	1.6801	1.09695	0.663454	0.338069	0.228821	0.410996	0.358353	1.1374	1.71785	0.132757	0.735333	0.282901	0.17361	0.804783	0.143984	0.500736	0.245818	0.395476	0.1212	0.182915	0.565245	1.02076	2.80105	0.136074	0.308266	1.93979	1.11042	2.1485	0.240035
1032.544@2.8	0.15687	0.316212	0.168804	0.115182	0.0670628	0.0365874	0.0734759	0.0688398	0.24481	0.351705	0.0246524	0.127936	0.0584514	0.0305107	0.171062	0.0205674	0.106205	0.0536073	0.0677032	0.0234082	0.0274966	0.117993	0.207088	0.616308	0.0218003	0.0507779	0.383208	0.20366	0.473427	0.0403128
1039.509@1.4	0.134138	0.601601	0.25014	0.361601	0.0804447	0.0525796	0.118218	0.0717209	0.345783	0.48438	0.0261238	0.19009	0.0984995	0.036065	0.190208	0.0522328	0.107326	0.0635089	0.0866892	0.0313882	0.0422513	0.162678	0.386164	1.26598	0.0392568	0.0846189	0.441365	0.329044	0.915771	0.0389063
1051.507@2.7	0.332469	0.996821	0.725803	0.454231	0.202915	0.16257	0.272584	0.223651	0.64857	1.04663	0.0804224	0.446487	0.177557	0.114887	0.458528	0.101878	0.292351	0.134068	0.257299	0.0770924	0.132273	0.339885	0.58936	1.64172	0.091674	0.213497	1.14443	0.418865	1.18973	0.155166
1051.511@2.8	0.0713816	0.248648	0.112078	0.066913	0.0363125	0.0266775	0.0426448	0.0382287	0.155224	0.207035	0.0110224	0.0742921	0.0280921	0.0148543	0.0928938	0.0113834	0.0694051	0.0309123	0.0410025	0.0128131	0.0155729	0.0762069	0.103236	0.31783	0.0143207	0.0280927	0.206249	0.12005	0.261277	0.0243877
1053.523@2.8	0.0782798	0.257154	0.099226	0.064632	0.0359349	0.0251248	0.0351281	0.0367974	0.155624	0.198636	0.0162634	0.0663872	0.0281463	0.0216149	0.0900842	0.018244	0.0587938	0.0279099	0.0389395	0.0132136	0.0246332	0.0693547	0.0749703	0.242822	0.0182938	0.0249799	0.195942	0.127731	0.303275	0.0271162
1053.524@2.7	0.288197	1.54863	0.989913	0.641312	0.291362	0.247722	0.391989	0.320601	1.01717	1.51106	0.120662	0.66188	0.257925	0.176312	0.449475	0.149987	0.44654	0.202079	0.371572	0.114054	0.19041	0.500854	0.85735	2.54711	0.137091	0.31395	1.68987	0.614001	1.76839	0.239551
1055.539@2.7	0.245735	0.902742	0.355516	0.27073	0.132104	0.132382	0.184816	0.165658	0.561139	0.813511	0.0620333	0.346994	0.125886	0.101016	0.369184	0.0609389	0.256847	0.114375	0.216696	0.0552976	0.0950971	0.272	0.416327	1.04434	0.0600416	0.146261	0.844816	0.522719	0.839905	0.132958
1056.9@1.9	0.00349558	0.15166	0.00736381	0.014714	0.00159496	0.00229237	0.00588102	0.00177564	0.00218939	0.0622414	0.00183216	0.0056605	0.0011598	0.00167035	0.00423318	0.00181872	0.0049129	0.00187531	0.00554164	0.00146741	0.00355227	0.030268	0.00971321	0.0907859	0.00325601	0.00717833	0.0078126	0.0291577	0.15346	0.00216166
1056.9@2.1	0.0309271	0.138376	0.0664528	0.0446345	0.0178677	0.0201623	0.0276834	0.0184345	0.0642469	0.0645588	0.0143541	0.043669	0.0143429	0.0137546	0.036536	0.012442	0.039693	0.0210621	0.0337758	0.0102866	0.0195288	0.0303706	0.0352393	0.142944	0.0166911	0.0321626	0.118289	0.0359436	0.142731	0.0250626
1057.554@2.7	0.289516	1.11144	0.478859	0.328524	0.158125	0.128551	0.152887	0.178737	0.586442	0.909786	0.0700247	0.419881	0.147225	0.0993432	0.4202	0.0953297	0.269612	0.142401	0.239787	0.0630966	0.118971	0.283129	0.542934	1.3014	0.0658355	0.172714	0.939264	0.594508	1.14491	0.137488
1061.514@1.2	0.21823	0.50499	0.143763	0.317436	0.07318	0.0545058	0.0911182	0.0954296	0.270886	0.410574	0.0134989	0.236586	0.0983124	0.0364285	0.198781	0.0203765	0.162265	0.0553731	0.0942632	0.0265872	0.0421237	0.210438	0.310449	0.749401	0.0174129	0.0428229	0.201701	0.248636	0.510664	0.0223971
1066.789@0.7	0.306286	1.02526	0.418671	0.249276	0.281147	0.154108	0.159314	0.224121	1.23051	1.51462	0.0432485	0.438795	0.170502	0.0716796	1.11924	0.0347532	0.337854	0.158271	0.37157	0.128068	0.0983714	0.6099	1.53876	2.32543	0.0389415	0.130443	0.599079	0.148967	2.12216	0.0710161
1069.512@2.8	0.137435	0.489042	0.21239	0.124214	0.0762478	0.0497311	0.0806729	0.0738677	0.297484	0.407198	0.0320512	0.148257	0.0531223	0.0422261	0.178885	0.0359101	0.134753	0.0596431	0.0733876	0.0276613	0.0511303	0.148077	0.17177	0.575537	0.0381014	0.0726135	0.383347	0.24923	0.512029	0.0562838
1071.53@2.8	0.14573	0.445889	0.195288	0.137183	0.0675307	0.044355	0.070102	0.0662077	0.254165	0.391529	0.0226746	0.121246	0.0489975	0.0285092	0.155746	0.0151468	0.116664	0.0479218	0.0678055	0.0250147	0.0320168	0.121498	0.126307	0.438193	0.0263543	0.0431412	0.327845	0.216732	0.483658	0.0422756
1079.54@2.6	0.404634	1.54466	0.82502	0.659356	0.255068	0.182382	0.356412	0.249115	0.796568	1.33901	0.0866851	0.638585	0.261002	0.11793	0.512027	0.0918232	0.324756	0.187991	0.269256	0.109073	0.124811	0.36284	0.92814	2.37217	0.104085	0.234705	1.16208	0.732623	1.92838	0.187442
1104.099@1.9	0.28473	0.647626	0.525919	0.36375	0.164547	0.160705	0.21564	0.178966	0.524657	0.771283	0.0788486	0.461477	0.183386	0.169966	0.348144	0.162924	0.311077	0.149804	0.260553	0.0724472	0.132514	0.214605	0.471105	1.03484	0.178426	0.186606	1.24688	0.35718	0.815752	0.149566
1109.525@1.1	0.294085	0.66986	0.255656	0.293325	0.11332	0.0668528	0.125094	0.109676	0.426204	0.668361	0.020299	0.214482	0.102122	0.0331392	0.286026	0.0253334	0.171153	0.0591307	0.132614	0.0384542	0.0380328	0.235215	0.49645	1.19849	0.0238503	0.0494058	0.363661	0.430961	0.747518	0.0347636
113.995@2.6	0.00590776	0.00891904	0.024385	0.00443839	0.00858136	0.0175302	0.000672598	0.00129709	0.0223985	0.00508348	0.0177087	0.00263134	0.00457304	0.00440399	0.00496908	0.00214252	0.0147442	0.00899532	3.8337e-06	0.000690647	0.0199839	0.00142107	0.000586523	0.00319546	0.040727	0.0757332	0.0547082	0.0131462	0.0248603	0.0121021
1138.491@1.1	0.0210514	0.066281	0.0250693	0.0279085	0.00919058	0.00555619	0.0112705	0.00931461	0.0323907	0.0633926	0.001598	0.0156631	0.00695679	0.00225173	0.0230253	0.00111861	0.0176876	0.00388038	0.00714224	0.00284597	0.00252238	0.0240356	0.00822611	0.0274645	0.00300704	0.00553904	0.0126787	0.0376885	0.043524	0.00439322
115.065@5.4	0.00787511	0.0140611	0.0242414	0.0201247	0.0114945	0.01613	0.00785607	0.00505415	0.014448	0.0178842	0.0080938	0.00779845	0.006724	0.00950168	0.0176002	0.0139608	0.0156796	0.014821	0.0185139	0.00435661	0.0204534	0.00909731	0.017004	0.0197372	0.0180447	0.0323377	0.0352481	0.0177421	0.0213879	0.00953788
1159.097@6.1	0.0284101	0.0583051	0.0423726	0.0328313	0.0211688	0.0258281	0.021115	0.0154187	0.040815	0.0439094	0.0132594	0.0243885	0.0141797	0.016572	0.0361957	0.0236812	0.0260476	0.0193665	0.0338132	0.00711564	0.0273675	0.0209877	0.0204019	0.070363	0.0189072	0.049213	0.0766612	0.0376022	0.0737054	0.0210849
118.027@2.6	0.0904981	0.224828	0.202228	0.154461	0.0648025	0.0832607	0.0825059	0.0583116	0.228516	0.328951	0.0403884	0.150284	0.047498	0.0459943	0.0738061	0.040172	0.12474	0.0679353	0.100972	0.0257109	0.0648576	0.114046	0.143554	0.293457	0.0715508	0.133395	0.453118	0.119564	0.350802	0.0688516
1180.501@0.8	0.076167	0.148477	0.0872785	0.0850032	0.03423	0.0224061	0.039658	0.03167	0.114593	0.170307	0.00671496	0.0541428	0.0301742	0.0123775	0.0754326	0.00851896	0.0528846	0.0193595	0.039935	0.0109172	0.0128686	0.0693692	0.141993	0.339587	0.00917892	0.0183512	0.123583	0.128404	0.240098	0.0120288
1187.091@1.9	0.980049	2.31288	1.99613	1.11184	0.597479	0.557359	0.820303	0.562386	1.7164	2.55114	0.435942	1.45517	0.568609	0.575095	1.08241	0.594523	1.08051	0.537671	1.29265	0.289245	0.727611	0.657273	1.49474	3.40973	0.616346	0.839782	4.05074	1.06348	2.6151	0.727709
1197.075@1.9	0.312177	1.25394	0.626323	0.347848	0.188867	0.174789	0.258906	0.177295	0.718574	0.801471	0.138993	0.45993	0.180905	0.177065	0.469364	0.187796	0.332669	0.170535	0.409778	0.0911562	0.233099	0.413841	0.476194	1.95276	0.193134	0.269367	1.25994	0.66588	1.56311	0.232888
1199.072@2	0.18416	0.603098	0.311675	0.2308	0.0889437	0.0827373	0.1216	0.0836419	0.270592	0.379251	0.0663088	0.218581	0.0860591	0.082904	0.230735	0.0893688	0.158473	0.0829383	0.191302	0.0431288	0.110763	0.200204	0.305989	0.944976	0.0729933	0.129012	0.601583	0.324134	0.757719	0.110781
1212.475@6.1	0.162255	0.69384	0.0733377	0.0661499	0.241401	0.622591	0.0893649	0.069259	0.0571964	0.45859	0.252423	0.0388837	0.11033	0.374322	0.293105	0.681934	0.0576863	0.156083	0.554613	0.031689	0.772898	0.0305494	0.346046	1.23171	0.319268	1.31824	0.146462	0.387932	0.891704	0.273588
122,0479@1	1.18061	0.652322	3.8606	1.73458	0.722685	1.2718	0.672811	1.05792	0.747878	2.06711	1.18045	0.65693	0.756384	1.19011	2.08592	0.347733	0.807988	2.16157	0.859272	0.290541	1.09674	0.540394	0.551677	0.577927	0.408014	1.72789	1.1835	1.00468	0.723878	0.527442
122.038@1.1	0.0034837	0.0444652	0.0903265	0.00443931	0.00389681	0.0038224	0.00612222	0.00948202	0.00135317	0.00428107	0.00768471	0.0508795	0.00278806	0.0194382	0.00383677	0.000649706	0.0167129	0.00563284	0.0307195	0.0104098	0.00627521	0.00679402	0.0231205	0.0404037	0.0205726	0.0171534	0.165534	0.00206918	0.0617102	0.0092725
1224.509@3.5	0.164053	0.380673	0.195507	0.196945	0.0859659	0.0679895	0.100103	0.0801299	0.233689	0.356455	0.0198444	0.158937	0.0844707	0.046644	0.222389	0.0292974	0.135434	0.0625351	0.119114	0.0197169	0.0392327	0.165464	0.202116	0.483412	0.0274508	0.0653103	0.286228	0.254554	0.27597	0.0411776
1228.442@6.1	0.157727	0.510154	0.0714763	0.0498183	0.208321	0.461575	0.0761453	0.062242	0.0499681	0.322317	0.195321	0.0336193	0.0966859	0.273799	0.255004	0.562254	0.0501055	0.113149	0.390704	0.0264178	0.575113	0.0220807	0.0258736	0.807631	0.230855	0.92625	0.130945	0.292747	0.608232	0.223097
1256.439@6.1	0.0456851	0.163219	0.0339388	0.0251082	0.0372788	0.0470088	0.0293385	0.021162	0.0803288	0.122419	0.029093	0.0186809	0.0283255	0.0398871	0.0745556	0.0496799	0.017243	0.0276607	0.0741257	0.00870295	0.0524335	0.012371	0.0804221	0.261368	0.0321437	0.0798864	0.0575955	0.0848122	0.198	0.0457202
132.024@4.5	0.92221	2.73295	1.6192	1.01796	0.783229	0.768722	0.405685	0.54058	1.04561	0.907415	0.422437	0.534614	0.734057	0.890168	1.25671	0.373654	1.00721	0.827122	0.848405	0.245881	0.744891	0.6517	1.02381	4.61265	1.16402	0.706006	1.58532	1.30478	3.75886	0.713931
133.019@3.2	0.18985	0.389718	0.143542	0.141522	0.129972	0.0803437	0.120791	0.0553908	0.0883827	0.0895483	0.0469202	0.100165	0.182534	0.0689716	0.264029	0.171076	0.0943129	0.0918383	0.273199	0.0330207	0.2631	0.0686585	0.06233	0.585643	0.291565	0.47601	0.22232	0.167218	0.528061	0.285194
135.067@5.1	0.0723381	0.425948	0.202562	0.110339	0.0711281	0.0869983	0.0578338	0.0479056	0.216674	0.348728	0.035549	0.135781	0.0489637	0.0659692	0.131801	0.0690847	0.0842242	0.07038	0.121246	0.0237115	0.0938853	0.133135	0.148694	0.654825	0.0865914	0.176528	0.171858	0.21253	0.493443	0.0738555
135.903@1.9	0.0796863	0.129367	0.0267218	0.0224732	0.00257049	0.00969905	0.0219801	0.0010337	0.0112982	0.0610101	0.0194568	0.0274108	0.0158021	0.012714	0.0177107	0.00933355	0.0208238	0.0109744	0.00958325	0.0331814	0.0231943	0.0184305	0.00651256	0.0303852	0.0181359	0.0425464	0.0227873	0.125418	0.0459592	0.0221772
145.11@1	0.0449764	0.493906	0.123732	0.165994	0.0693409	0.168146	0.0570288	0.0787299	0.276578	0.402268	0.0266875	0.17081	0.0855945	0.174002	0.0912848	0.100801	0.169581	0.0641547	0.191854	0.0343189	0.226781	0.130365	0.0832614	0.842342	0.0617039	0.144799	0.515115	0.254971	0.578421	0.0528573
147.035@1.7	0.10381	0.0656704	0.182538	0.171444	0.147515	0.180461	0.123797	0.0568767	0.0882769	0.121477	0.0812256	0.0916574	0.137034	0.182322	0.171133	0.16205	0.129174	0.0944552	0.260983	0.0296381	0.226878	0.110688	0.237849	0.680155	0.179246	0.344382	0.0834826	0.140401	0.554495	0.12632
1478.42@6.1	0.178188	0.277731	0.11129	0.0916023	0.135025	0.13454	0.0941871	0.0755952	0.0791117	0.0340884	0.0743162	0.0717012	0.0965102	0.110106	0.252567	0.0638028	0.0779194	0.0863078	0.210073	0.0297045	0.124053	0.0467641	0.0597537	0.43992	0.0909215	0.103542	0.363621	0.205704	0.0675463	0.12377
148.016@0.7	0.0234812	0.182714	0.106462	0.0747217	0.0472462	0.00788206	0.0584063	0.0327081	0.100874	0.133201	0.0240138	0.0884156	0.035463	0.0517518	0.0777266	0.0336504	0.0618931	0.0341064	0.115819	0.0215674	0.0476209	0.045836	0.0489565	0.0996843	0.0467045	0.0731265	0.16657	0.104751	0.0821432	0.0503688
1489.058@1.4	0.144032	0.587038	0.143067	0.179408	0.0497558	0.0165671	0.0505407	0.0470749	0.243592	0.578756	0.00521186	0.121365	0.038594	0.0100406	0.232377	0.0096202	0.0643344	0.0135733	0.0501901	0.0143625	0.00861215	0.350306	0.535703	0.908278	0.022225	0.0192101	0.122588	0.363945	0.584598	0.00999494
1489.107@2.8	0.399791	0.0974102	0.120638	0.0776661	0.0899419	0.0156638	0.0360352	0.0650662	0.357381	0.240812	0.0210433	0.117687	0.0737631	0.00801002	0.222981	0.0281874	0.082956	0.0350803	0.041559	0.0257283	0.0283829	0.173208	0.266728	0.17887	0.0284328	0.047807	0.138365	0.20554	0.340143	0.0382988
149.999@3.8	0.00182744	0.00462419	0.000901613	0.00535693	0.00865007	0.00490426	0.0044748	0.000534002	0.00366753	0.00246141	0.00765888	0.0028623	0.00458747	0.0108751	0.00470137	0.013341	0.00275027	0.00448089	0.0134577	0.000786148	0.0122017	0.000524764	0.00183482	0.00990858	0.0077125	0.0163226	0.00266956	0.0105394	0.00637989	0.00750633
149.999@5	0.069672	0.0766348	0.0606421	0.0343539	0.0316085	0.0347673	0.0406729	0.0275165	0.0660007	0.0642871	0.0298023	0.0469692	0.03465	0.0407966	0.0812084	0.0484287	0.0303422	0.0209887	0.0590189	0.00621074	0.0447725	0.0232812	0.0329416	0.0795492	0.0346056	0.0711906	0.136743	0.0488453	0.0951323	0.0483033
1517.141@2.8	2.12925	0.69754	0.454996	0.333007	0.346355	0.0856668	0.202953	0.307991	1.60182	1.16153	0.00996789	0.531076	0.322941	0.0366791	1.23176	0.0120227	0.364961	0.184919	0.152061	0.0912078	0.0166602	0.544641	0.869118	0.417143	0.00443223	0.0433185	0.583205	1.19474	0.149363	0.0327522
1518.144@2.8	1.62539	0.481024	0.323268	0.213563	0.249128	0.0549131	0.129693	0.21393	1.1074	0.82993	0.00757584	0.337024	0.226601	0.0236208	0.857828	0.0069817	0.25	0.14115	0.0830329	0.0613155	0.0106567	0.35372	0.661731	0.334541	0.0420721	0.0282637	0.404671	0.82629	0.119994	0.0213543
1525.145@2.8	0.241671	0.156671	0.121545	0.126411	0.0631963	0.0172444	0.0782845	0.0533634	0.220763	0.253805	0.0142851	0.144077	0.0809191	0.008362	0.279908	0.00732075	0.10268	0.0205341	0.128954	0.0207572	0.0196359	0.133452	0.120162	0.0680479	0.0207708	0.0114263	0.0530707	0.260891	0.260763	0.00707775
1530.175@2.8	0.131292	0.0934948	0.0393853	0.0590932	0.0282687	0.00884606	0.0321419	0.0301867	0.18015	0.140673	0.0108841	0.0929689	0.0459448	0.00504235	0.150785	0.0150625	0.0623731	0.0152841	0.0310656	0.0113909	0.0150093	0.0562668	0.084779	0.207078	0.0148199	0.0258179	0.0396627	0.128843	0.183185	0.0199281
1543.154@2.8	2.16872	1.1473	0.556165	0.53004	0.408767	0.13908	0.322087	0.415544	1.83899	1.61034	0.0135894	0.713503	0.448773	0.0518245	1.56984	0.0192953	0.470494	0.228898	0.227664	0.122182	0.0256168	0.635167	1.09281	0.487929	0.00633843	0.0651396	0.592243	1.7324	0.185059	0.0524943
1544.159@2.8	1.72307	0.965994	0.355346	0.345441	0.301141	0.0969313	0.205329	0.302713	1.44988	1.22807	0.0112045	0.505724	0.319268	0.0358793	1.15137	0.00961224	0.33206	0.192968	0.11031	0.0863071	0.0171451	0.434593	0.935852	0.399623	0.00421202	0.0438671	0.461372	1.24101	0.174374	0.0375045
1546.174@2.8	0.871799	0.541119	0.266043	0.161533	0.146093	0.0407058	0.0909231	0.135003	0.709603	0.619305	0.00554432	0.249019	0.153384	0.0158344	0.562332	0.0419724	0.163642	0.100949	0.123784	0.0403398	0.00675649	0.206457	0.524666	0.678534	0.0410909	0.0708781	0.225374	0.564567	0.117659	0.0169978
1550.156@2.7	0.181556	0.111317	0.140085	0.102336	0.0601293	0.0199401	0.0918163	0.0462284	0.124261	0.206872	0.019239	0.091075	0.0665632	0.028923	0.207097	0.00787004	0.0672425	0.0336861	0.120254	0.0169287	0.0275485	0.103869	0.11286	0.362407	0.0247184	0.0134641	0.260618	0.22493	0.306241	0.0371897
1553.17@2.7	0.233471	0.252885	0.127959	0.154679	0.0759002	0.0217002	0.0913659	0.0583982	0.216983	0.282999	0.0199542	0.130704	0.0932049	0.00849586	0.309179	0.00715444	0.110178	0.0211314	0.129634	0.0236646	0.0247586	0.141671	0.148426	0.0749216	0.0266753	0.0138244	0.289383	0.297351	0.340932	0.0404683
1567.156@2.7	1.30226	0.822836	0.503911	0.569952	0.296806	0.117206	0.285241	0.332579	0.941272	1.10236	0.010168	0.487693	0.340102	0.034687	0.901061	0.0125428	0.240135	0.145884	0.104987	0.0941194	0.0205281	0.328663	0.911731	0.374344	0.00621645	0.0530604	0.341846	1.29198	0.156112	0.0352845
1568.159@2.7	1.12103	0.731266	0.477193	0.548093	0.270028	0.103387	0.288685	0.282572	0.82034	1.01477	0.00799373	0.446546	0.309336	0.0315149	0.859407	0.0161909	0.243988	0.119672	0.192924	0.0842578	0.0188157	0.342955	0.77211	0.324615	0.0567531	0.0504303	0.269046	1.15304	0.125371	0.0298609
1570.173@2.7	0.947629	0.767259	0.316094	0.401135	0.220871	0.0821803	0.224146	0.226496	0.810009	0.951417	0.00744411	0.402347	0.272613	0.0283697	0.822035	0.0128247	0.255155	0.114444	0.168466	0.0701446	0.0134546	0.336686	0.652545	0.293859	0.0485292	0.0408535	0.239111	0.995176	0.111116	0.0263002
1571.183@2.7	0.828988	0.783978	0.239668	0.321509	0.186401	0.0669325	0.176189	0.186422	0.7564	0.848003	0.00696886	0.354865	0.23296	0.0234963	0.724875	0.00934972	0.226411	0.111094	0.121944	0.0592457	0.0113247	0.291333	0.623601	0.283693	0.0416235	0.033882	0.219893	0.840214	0.117849	0.0238284
1572.188@2.7	0.325792	0.337289	0.125983	0.101943	0.0516924	0.024579	0.0585679	0.0704277	0.311054	0.321656	0.00313464	0.127797	0.082384	0.00855274	0.256946	0.0247232	0.0790061	0.0481585	0.0670844	0.0217081	0.0240058	0.0930638	0.263973	0.358113	0.0224132	0.0435521	0.0890408	0.312939	0.0509208	0.0101701
1575.17@2.7	0.311218	0.212051	0.293645	0.354184	0.12925	0.0307046	0.17731	0.0739102	0.26267	0.370961	0.0258241	0.131223	0.137652	0.0363897	0.376495	0.0133516	0.111568	0.0221422	0.203142	0.0334544	0.00664831	0.176419	0.243304	0.140471	0.0404395	0.0226115	0.380581	0.408333	0.457196	0.0559552
158.069@7.5	0.101137	0.395654	0.09005	0.132884	0.120628	0.27887	0.123728	0.0250245	0.0560931	0.336733	0.137339	0.11147	0.100148	0.166924	0.312311	0.164732	0.059828	0.0660935	0.30183	0.0463191	0.250299	0.0265931	0.253989	0.699272	0.2944	0.48518	0.427892	0.030349	0.123783	0.111511
1589.139@2.7	0.837683	0.649851	0.515386	0.865168	0.240659	0.0713408	0.279993	0.266895	0.493689	0.755383	0.029862	0.362347	0.280466	0.0166872	0.579817	0.00937283	0.131413	0.0914479	0.0790785	0.0795176	0.0116075	0.188735	0.934995	0.42926	0.004214	0.0404445	0.181186	0.913588	0.149443	0.0223032
1591.154@2.7	1.11605	0.783871	0.845933	1.19181	0.361147	0.0993598	0.436454	0.354297	0.621203	0.989077	0.0068225	0.474529	0.407072	0.022046	0.837163	0.0204212	0.205762	0.108092	0.216073	0.112193	0.0769023	0.29956	1.24832	0.586192	0.0055586	0.0581217	0.839181	1.25778	1.02933	0.0257488
1592.158@2.7	0.498209	0.371102	0.298977	0.518425	0.143863	0.0422838	0.164822	0.158744	0.288004	0.448934	0.0034677	0.213334	0.165641	0.0098901	0.344351	0.00560241	0.0778286	0.0529588	0.0460215	0.0474043	0.0069254	0.111507	0.543382	0.256894	0.0260618	0.023928	0.108603	0.540081	0.0865669	0.0134071
1595.184@2.7	0.898157	1.87074	1.00665	1.33526	0.3622	0.145586	0.600869	0.386821	1.3701	2.67918	0.114543	0.865429	0.54701	0.171602	1.60249	0.172985	0.560701	0.162467	0.515451	0.146039	0.0676261	0.64904	0.976139	1.53087	0.179276	0.158657	0.570881	1.48298	2.07794	0.0682775
1597.196@2.7	0.320716	0.377891	0.242643	0.261246	0.0989266	0.0628301	0.126562	0.0944089	0.287035	0.439673	0.0283281	0.162977	0.134703	0.0471205	0.365062	0.046947	0.139331	0.0434495	0.116533	0.0329616	0.0525456	0.152014	0.318543	0.617459	0.0461555	0.0768189	0.377492	0.400183	0.0585281	0.0070403
161.051@1.3	0.227251	0.135044	0.398099	0.353366	0.314387	0.419134	0.293054	0.12917	0.183352	0.266876	0.249265	0.207295	0.324211	0.472251	0.375048	0.380947	0.285164	0.216418	0.648611	0.068596	0.622281	0.204583	0.120454	1.38742	0.471422	0.8875	0.26703	0.293681	1.17068	0.31894
161.105@7.5	0.377067	0.514489	0.925431	1.00639	0.754364	0.906794	0.34668	0.316479	0.675981	1.51181	0.373981	0.269747	0.319523	0.542124	1.32018	0.211872	0.898154	0.831824	0.851645	0.0851844	0.552162	0.687788	0.374226	0.772619	0.583902	0.442857	0.92538	1.10262	0.84233	0.174963
162.027@9.5	0.0271417	0.173439	0.114832	0.0114754	0.0248573	0.0438286	0.0447239	0.0184952	0.0208092	0.0470423	0.0567926	0.107706	0.0301046	0.0702986	0.0291845	0.0688142	0.0391848	0.0333337	0.106834	0.0178117	0.0974701	0.0595158	0.0590028	0.313137	0.0841916	0.0877619	0.257073	0.106416	0.257586	0.0810022
164.006@9.5	0.388456	0.403075	1.08042	0.351059	0.292798	0.438446	0.493901	0.288698	0.627729	0.967435	0.675553	1.05492	0.341231	0.807356	0.421852	0.77897	0.525452	0.386151	1.19601	0.195747	1.14266	0.150262	0.581648	0.728411	1.04982	0.960273	3.2996	0.266072	0.624516	0.946307
1674.031@1.9	0.0636414	0.171326	0.166937	0.0821588	0.0426787	0.0504697	0.0660097	0.0419551	0.118823	0.205063	0.0392053	0.111037	0.0384072	0.0510232	0.0753495	0.0532672	0.0939991	0.0448965	0.0942313	0.0234932	0.0615726	0.046486	0.0756264	0.201404	0.0579487	0.083805	0.351325	0.0806486	0.226724	0.0675398
168.978@5.9	0.0334932	0.299011	0.213545	0.20521	0.0940033	0.134858	0.0808301	0.0233496	0.0654425	0.0422711	0.0447229	0.115353	0.0232167	0.0971291	0.0994222	0.0343225	0.283576	0.115237	0.268302	0.0365392	0.0851977	0.21054	0.0804847	0.508759	0.125729	0.242552	0.233467	0.106322	0.223874	0.0677365
1700.55@6.1	0.134695	0.40289	0.0627919	0.148182	0.113933	0.166537	0.0624524	0.0469161	0.0398132	0.268413	0.085884	0.123748	0.0692958	0.12624	0.186774	0.175711	0.0481136	0.075468	0.205249	0.0199197	0.172736	0.0262685	0.0272847	0.571779	0.102986	0.274263	0.121558	0.218641	0.447907	0.117872
174,1015@6,4	0.0553037	0.288835	0.0807967	0.110378	0.0544855	0.0496992	0.0642072	0.0283111	0.0970848	0.233834	0.0331402	0.0683913	0.0468262	0.0525148	0.0870055	0.0709179	0.0601385	0.04041	0.102727	0.0162452	0.071457	0.0947428	0.144632	0.474917	0.0536834	0.109882	0.172434	0.151723	0.35214	0.0530722
175.066@1.1	0.128549	0.0961177	0.191804	0.158755	0.158492	0.203837	0.147915	0.06596	0.115498	0.142273	0.118876	0.093512	0.158928	0.231469	0.191799	0.194896	0.137004	0.10058	0.328647	0.0342787	0.299533	0.0977208	0.0803001	0.0984843	0.230069	0.444802	0.159483	0.158284	0.534274	0.156215
180,0646@6,6	0.0532509	0.0584124	0.385209	0.151216	0.0930065	0.188501	0.0502529	0.0444318	0.137452	0.103038	0.129886	0.032792	0.0612849	0.102267	0.0701456	0.105742	0.0597654	0.203433	0.0856571	0.0764	0.141694	0.113413	0.0466189	0.100896	0.282279	0.435981	0.176759	0.114872	0.224322	0.0966452
180.009@5	0.044346	0.0491053	0.0304647	0.0139535	0.0181681	0.0198585	0.0210276	0.0112614	0.0427731	0.0353394	0.0158144	0.0311112	0.0182985	0.0231758	0.0452929	0.0286352	0.0170844	0.0129924	0.0307152	0.00450776	0.0262535	0.0113541	0.012944	0.0485483	0.0190883	0.0368563	0.0643776	0.0288364	0.055936	0.0258199
185.988@9.5	0.386552	0.460405	1.05267	0.351967	0.288843	0.42062	0.480607	0.285135	0.63645	0.972396	0.630144	1.02318	0.335683	0.752554	0.418138	0.726473	0.516717	0.370793	1.14139	0.188	1.05412	0.161624	0.59171	0.775208	0.966319	0.915184	3.1921	0.282126	0.671767	0.893805
1888.036@2	0.059038	0.145453	0.156078	0.0748229	0.0452195	0.0464464	0.0630743	0.040552	0.11562	0.184186	0.0444645	0.110442	0.0369912	0.0518798	0.0671279	0.0544986	0.0862252	0.0411245	0.0927408	0.021464	0.068486	0.0386909	0.0733493	0.232835	0.0665279	0.0821528	0.390667	0.0706545	0.236181	0.070168
1889.035@1.9	0.0319243	0.0778892	0.0852172	0.0391801	0.0218363	0.0254259	0.0342672	0.0214849	0.0581384	0.101218	0.023071	0.0595241	0.0199166	0.0294081	0.036924	0.0300701	0.0468543	0.0227004	0.0485313	0.0119026	0.0348862	0.0202401	0.0387928	0.111868	0.0363428	0.0452893	0.187551	0.0383207	0.118341	0.0413193
1890.036@1.9	0.0589791	0.146056	0.155687	0.0748229	0.0405491	0.0465207	0.0630743	0.0405574	0.114102	0.18442	0.0374675	0.110545	0.0370148	0.0518907	0.0674402	0.0445647	0.0860944	0.0410838	0.0904929	0.0215461	0.0580376	0.0386522	0.0733735	0.188402	0.0665043	0.0821532	0.339151	0.0711255	0.175967	0.0702269
1892.03@1.9	0.0505365	0.140538	0.134826	0.0673842	0.0352525	0.0403886	0.0544426	0.0351799	0.10029	0.164902	0.037582	0.0956237	0.0329977	0.0441821	0.0608858	0.0390299	0.074926	0.0351011	0.0771	0.0188647	0.0591327	0.0370857	0.0647215	0.162448	0.0482686	0.0706675	0.294614	0.0642237	0.161776	0.0604785
1933.022@1.4	0.0261114	0.117715	0.041985	0.0458278	0.01537	0.0117593	0.0176661	0.0118999	0.0917356	0.10143	0.00488285	0.0290937	0.0093665	0.00546714	0.0404482	0.00642316	0.0350008	0.0121767	0.0135745	0.00441276	0.00837297	0.0451991	0.0552488	0.298215	0.00485933	0.0131007	0.0835456	0.0667593	0.200975	0.00835461
1alpha,25-dihydroxy-20,26,27-trimethyl-23-oxavitamin D3	0.0963629	0.141271	0.131022	0.103711	0.081482	0.125959	0.0686767	0.0503267	0.104685	0.0832723	0.0502359	0.0580653	0.0653751	0.0799603	0.160171	0.0911716	0.101966	0.0778527	0.149578	0.0273928	0.126596	0.0658814	0.161863	0.460473	0.117069	0.221797	0.211489	0.10351	0.152466	0.0788544
1-Aminocyclopropane-1-carboxylic acid	0.0315472	0.134238	0.0738224	0.0265245	0.0378878	0.0315034	0.0258565	0.0166548	0.0784983	0.070818	0.0276956	0.0267983	0.0355891	0.0201022	0.0297617	0.0310657	0.0222819	0.0365331	0.0316786	0.00799213	0.030297	0.0219983	0.0712616	0.236021	0.0341295	0.0662855	0.157833	0.0417041	0.179611	0.0535015
1-heneicosanoyl-2-(4Z,7Z,10Z,13Z,16Z,19Z-docosahexaenoyl)-sn-glycero-3-phosphoethanolamine	4.5396	9.51359	5.38124	4.45007	2.59285	1.73476	3.46118	2.40954	8.29365	9.949	0.252839	3.11672	2.11594	0.628848	6.74452	0.79802	4.963	1.57273	4.7301	0.879071	0.595256	4.85718	5.21315	17.1186	0.429424	1.25639	6.12072	7.3436	8.12831	0.756752
1-octadecanoyl-2-(9Z-octadecenoyl)-sn-glycero-3-phosphoserine	1.61672	3.01806	0.645677	1.5975	0.451041	0.250045	0.504075	0.403136	1.45886	2.46358	0.067661	1.02103	0.441188	0.127538	1.52388	0.104485	0.631448	0.190756	0.522977	0.138021	0.127589	1.86446	2.25881	4.90166	0.0838927	0.239073	0.983305	1.54155	2.8388	0.102443
203.115@6.2	0.157165	2.62373	1.6744	3.27899	1.80366	2.4222	0.713776	0.198262	0.576498	1.63829	0.547918	0.87085	0.204757	0.72107	1.03957	0.403908	4.21369	0.486626	2.18866	0.143516	1.14815	4.24199	0.240587	4.49613	0.411586	4.60794	0.821244	1.35489	0.820829	0.14533
2036.949@1.4	0.0470953	0.239817	0.0896331	0.167358	0.0247639	0.0124937	0.0361252	0.0202013	0.113821	0.191851	0.00669023	0.0575359	0.0269459	0.0067024	0.0693673	0.0121736	0.0315521	0.0154162	0.0193814	0.00925474	0.00935459	0.0660586	0.0903729	0.478539	0.00914916	0.0159712	0.111699	0.12787	0.351482	0.012016
204.092@4.1	0.00390781	0.01201	0.0113412	0.00832431	0.00470929	0.00770095	0.00453619	0.00239559	0.00519217	0.008386	0.00314068	0.00368362	0.00332672	0.00491219	0.00695209	0.00535382	0.00715092	0.00430042	0.00931125	0.00169561	0.00703408	0.00549556	0.00662391	0.0221246	0.00756998	0.015377	0.0150086	0.00738089	0.0198876	0.00529562
2100.045@2	0.0418261	0.166559	0.103443	0.0530138	0.028422	0.0307288	0.0409156	0.0289165	0.0937507	0.135903	0.0282681	0.0710763	0.025186	0.0311352	0.0477512	0.0332786	0.0587995	0.027956	0.0598168	0.014263	0.0439485	0.0305943	0.0497807	0.216722	0.0417871	0.0536201	0.228594	0.0808204	0.220453	0.0444112
213.069@4.9	0.00666803	0.0234786	0.012627	0.0107866	0.00565686	0.0135669	0.00596768	0.00346021	0.0112547	0.0147937	0.00443142	0.00593859	0.00352812	0.00563556	0.00759809	0.00915567	0.0113885	0.00657108	0.0111334	0.00255666	0.0104583	0.0108274	0.0075358	0.0301619	0.00835853	0.0191827	0.0101929	0.0191262	0.0342756	0.00534217
215.188@2.3	0.0330981	0.171873	0.0605861	0.0531351	0.0260142	0.0265011	0.0379859	0.0420673	0.141671	0.255567	0.0236228	0.122735	0.0673723	0.0390297	0.141671	0.00389681	0.0468845	0.0321653	0.0684155	0.0142771	0.0177364	0.0480454	0.123853	0.382749	0.0264218	0.0582019	0.212659	0.112008	0.451864	0.04003
216,1471@3,4	0.0286025	0.145335	0.055457	0.0544754	0.0187076	0.0323006	0.0267497	0.0185763	0.0443406	0.0676177	0.019324	0.0390501	0.0315946	0.0416641	0.0319782	0.038466	0.0321344	0.0741333	0.0609071	0.00591396	0.0595378	0.0261096	0.039114	0.235112	0.0240147	0.0256033	0.158488	0.0782522	0.177897	0.0334142
216.041@3.8	0.153311	0.0144632	0.239304	0.0570044	0.145069	0.198699	0.100453	0.0331055	0.0722509	0.117673	0.200124	0.121044	0.106477	0.24732	0.115776	0.40896	0.0850209	0.123255	0.258172	0.0199171	0.370236	0.00839078	0.00514916	0.0154533	0.205924	0.395298	0.369837	0.141413	0.0926207	0.233761
217.929@9.5	0.0296278	0.0201052	0.0600039	0.0205748	0.0202948	0.0188273	0.0321317	0.0226345	0.0516824	0.0778004	0.0268587	0.064332	0.0199125	0.0388852	0.043995	0.0288637	0.0286331	0.0189169	0.0647124	0.0110689	0.035355	0.0205385	0.045789	0.0460602	0.0367299	0.0470841	0.178321	0.0239954	0.086987	0.0375118
218,072@1,2	0.0449891	0.137562	0.0878912	0.0558902	0.0299333	0.0272298	0.0263094	0.0158713	0.035126	0.0345533	0.00972594	0.0464793	0.0234158	0.0490814	0.018439	0.0449458	0.0359138	0.0240169	0.113644	0.00368724	0.196937	0.0834339	0.0215725	0.244456	0.0643978	0.0545178	0.163251	0.0496278	0.182754	0.0271268
222.02@5	0.0284358	0.0278854	0.0304722	0.0170055	0.0126889	0.0142272	0.0192271	0.010216	0.0367715	0.0232684	0.0127027	0.0220769	0.0140485	0.0185038	0.03926	0.0213663	0.0118853	0.00999786	0.0231821	0.00356043	0.0196608	0.0101455	0.0139058	0.0377904	0.0139317	0.0293298	0.060376	0.0229138	0.0484673	0.0205636
222.038@1.2	0.0478689	0.120055	0.0520574	0.0669489	0.0170931	0.0215538	0.0232642	0.0151488	0.0527586	0.111564	0.0105603	0.0448068	0.0276437	0.0229732	0.0450737	0.0153579	0.037046	0.0163021	0.0304535	0.00766703	0.011287	0.0387993	0.0998422	0.423635	0.0254324	0.0373973	0.121437	0.0560226	0.279034	0.0162683
224,0298@9,5	0.0135865	0.00432525	0.0880894	0.0105675	0.00941651	0.0252194	0.024622	0.00791537	0.0182365	0.0192355	0.0414925	0.0355114	0.00675906	0.0408628	0.0140887	0.0711863	0.0484923	0.0268747	0.165528	0.0105615	0.0699494	0.00991487	0.060089	0.130887	0.0673194	0.0626255	0.154843	0.0280384	0.0392669	0.052067
227.084@3.9	0.0190801	0.026521	0.0281112	0.0227264	0.0161091	0.0281814	0.0113527	0.00796951	0.018004	0.0227068	0.00882157	0.0115541	0.00905744	0.0127827	0.0241115	0.0205998	0.0269941	0.0164328	0.0248984	0.00570744	0.0224804	0.0136129	0.0181291	0.0475054	0.0187113	0.0405723	0.0360805	0.0234334	0.0437292	0.0121589
232,1434@3,9	0.0122382	0.0235461	0.0277063	0.00937508	0.00650612	0.0100077	0.00762313	0.00993902	0.0160737	0.0161979	0.0111623	0.0095339	0.00640033	0.0138296	0.00992436	0.0114495	0.00420185	0.0085076	0.0166314	0.00185782	0.0183791	0.00458327	0.0180535	0.0597472	0.00790957	0.00923523	0.0669847	0.0160516	0.0383611	0.0115926
234.023@1.1	0.115678	0.243757	0.15566	0.113557	0.0566064	0.0698906	0.0747613	0.058767	0.186137	0.220337	0.0412934	0.128505	0.0647336	0.0560646	0.113998	0.0525882	0.0933454	0.0586036	0.123823	0.0222023	0.0664679	0.0645986	0.113583	0.33656	0.0503443	0.0678896	0.334101	0.134985	0.316396	0.0688848
238,1001@6,1	6.60746	6.67956	9.00442	6.96421	5.735	8.62626	5.04619	3.65892	7.64111	8.45201	4.26493	5.12165	3.86422	5.24269	9.85514	6.95691	5.64614	4.14052	9.91575	1.67942	9.01334	4.47597	4.51314	7.36241	5.82337	15.9262	16.4817	0.273018	13.5277	6.19564
238.013@9.5	0.0990292	0.261207	0.146804	0.0440967	0.0646915	0.0271533	0.0532462	0.0331244	0.0814386	0.0957623	0.0156991	0.0767513	0.0246367	0.0409748	0.0489143	0.0545692	0.053234	0.0416064	0.10886	0.0216757	0.0390175	0.0562647	0.0938257	0.302167	0.0225164	0.0372141	0.207692	0.00439792	0.175712	0.0324134
240.031@3.8	0.0104974	0.0112026	0.0200165	0.00810463	0.0134061	0.0107992	0.0105033	0.000964589	0.0129375	0.00580899	0.0122193	0.00710808	0.00774702	0.0161311	0.013978	0.0209571	0.00979298	0.00881057	0.0213769	0.00283103	0.0239616	0.00203597	0.00462759	0.0162533	0.0107215	0.0278145	0.0216886	0.0231502	0.0205903	0.0142784
249.98@2.3	22.0745	55.0675	32.9835	19.6082	9.3483	9.7814	14.4703	10.9239	37.4263	55.884	5.28751	28.6648	9.12955	8.33034	26.4286	6.92296	19.2224	7.94697	19.7446	4.57371	9.97291	19.3366	32.7647	88.9755	8.87341	13.2215	83.5179	33.8255	76.3157	11.8215
2507.048@1.9	0.0277064	0.0725297	0.0739463	0.036207	0.0192856	0.0235876	0.0326792	0.0194124	0.0534662	0.0857502	0.0186273	0.051183	0.0172852	0.0238743	0.0333006	0.0246504	0.0404273	0.0207987	0.0448951	0.0108792	0.0332604	0.0178048	0.0345199	0.0877048	0.0279752	0.0390358	0.165438	0.0366321	0.089695	0.0323155
251.161@0.8	0.0358352	0.081878	0.0426379	0.0401403	0.013257	0.0123268	0.021338	0.0131966	0.050112	0.0661506	0.00699249	0.0252624	0.0178514	0.00966615	0.0316637	0.0108723	0.0225287	0.0152366	0.0225211	0.00587867	0.0108944	0.0266539	0.0470908	0.154337	0.0103491	0.0187774	0.0876081	0.0576161	0.0954908	0.0145914
251.998@6.8	0.104094	0.517531	0.263208	0.0417829	0.0118522	0.00925282	0.080379	0.0117506	0.0334811	0.455366	0.0407064	0.0328693	0.0113599	0.0149909	0.0338864	0.0522519	0.0359805	0.0167613	0.116435	0.000966612	0.0182676	0.0104831	0.0445019	0.145221	0.0170727	0.0940715	0.11443	0.0082489	0.0787472	0.0149736
2511.045@1.9	0.065348	0.174638	0.172553	0.0847013	0.0443387	0.0514804	0.0701843	0.0443337	0.127022	0.205922	0.0471822	0.11787	0.0399766	0.0539932	0.0761521	0.0558481	0.0939489	0.0456512	0.0980083	0.0239983	0.0736132	0.0443902	0.0793732	0.201108	0.0695105	0.088837	0.370313	0.0831592	0.212823	0.0713643
2517.037@1.9	0.057395	0.157247	0.150917	0.0723164	0.0382055	0.0441454	0.0573646	0.0380508	0.107035	0.18784	0.0350292	0.0977432	0.0342542	0.0455201	0.0659527	0.0475385	0.0829351	0.0402292	0.08301	0.0203693	0.0552332	0.0406874	0.0670728	0.176774	0.0588367	0.0750565	0.309988	0.0710688	0.17939	0.0603064
253.892@1.3	0.0279355	0.0622812	0.0250378	0.0154524	0.00899725	0.0215325	0.0131801	0.0128104	0.0464457	0.0319045	0.0117039	0.0191331	0.0147143	0.0140842	0.0243943	0.0198366	0.0164156	0.0140733	0.0269359	0.00546864	0.022201	0.00538025	0.00181717	0.0173522	0.0199581	0.0277141	0.0676628	0.0209235	0.0418589	0.0197829
253.949@2.2	0.0628466	0.26565	0.134917	0.102166	0.0398351	0.0450376	0.0534395	0.0379415	0.134745	0.20497	0.02928	0.0897571	0.0328409	0.0342792	0.0874322	0.0337042	0.0900864	0.0369921	0.0693376	0.0180754	0.0408173	0.0658388	0.063983	0.252885	0.038363	0.0629894	0.300649	0.104771	0.30934	0.0497504
254@1.1	0.0575661	0.156688	0.0592514	0.0400002	0.0299567	0.03451	0.0313242	0.0255187	0.0715801	0.0725664	0.019577	0.0470071	0.0262261	0.0297699	0.0535677	0.0274582	0.0350961	0.0304052	0.0557118	0.00794163	0.0353344	0.0503908	0.0419443	0.239312	0.030649	0.0749217	0.141074	0.0431973	0.187549	0.0332373
257,1025@8,0	1.17886	0.639548	1.06854	0.555164	0.239055	0.444707	0.501984	0.20384	0.581735	0.510674	0.322992	0.718652	0.71572	0.651852	0.600332	0.418149	0.192865	0.817885	0.68504	0.117105	0.52126	0.18107	0.483319	0.392391	0.428904	0.617751	0.904587	0.665696	0.666735	0.599276
257.068@3.4	0.0104542	0.0245569	0.0231231	0.0201481	0.0114698	0.0371529	0.0205042	0.0079136	0.0122101	0.0160014	0.0103627	0.0112518	0.00728196	0.0206307	0.0187094	0.0329889	0.0135545	0.00903301	0.0707789	0.00294473	0.0433975	0.0112052	0.00866925	0.0197518	0.0317625	0.0488932	0.0302807	0.0277573	0.031847	0.0277171
260.082@6.1	0.0945931	0.129816	0.137791	0.103585	0.0674342	0.0823619	0.0701715	0.0475593	0.1122	0.123724	0.0513201	0.0765238	0.0494794	0.0618751	0.125984	0.0716482	0.0887538	0.0560665	0.121906	0.0215668	0.0871198	0.0587636	0.0643258	0.11169	0.0650279	0.136496	0.249273	0.00617403	0.210232	0.0748315
260.123@1.1	0.0233141	0.169692	0.00145775	0.286096	0.027407	0.0925647	0.0656062	0.0247813	0.0561941	0.09744	0.0549278	0.0724202	0.0394696	0.00449914	0.0515321	0.0113625	0.0517104	0.0205895	0.196829	0.0464016	0.0887398	0.0570364	0.0912143	0.693055	0.0183361	0.0187532	0.0924944	0.0347125	0.0421173	0.107793
261.031@4.9	0.00762628	0.0232044	0.0131308	0.0332516	0.00575812	0.00648306	0.0100323	0.0026041	0.0110777	0.0109585	0.00331977	0.00468645	0.00522408	0.00575976	0.0133969	0.00686889	0.0170229	0.00639265	0.013595	0.00229599	0.013848	0.00776197	0.00649943	0.0314258	0.00918778	0.0341423	0.013689	0.0177564	0.0261326	0.012984
261.068@3.7	0.00894686	0.0239998	0.0154835	0.00984	0.00653833	0.0125039	0.00778361	0.00478144	0.017221	0.0167482	0.00365503	0.0100677	0.00445793	0.00581023	0.00976529	0.00906672	0.014763	0.00966257	0.0128844	0.00265504	0.0100867	0.00689412	0.0104884	0.0431722	0.00822975	0.0184331	0.0379493	0.0121717	0.032759	0.00869458
261.974@9.5	0.0488382	0.220902	0.0500475	0.0544425	0.00695662	0.0222502	0.0163525	0.0271423	0.0927036	0.148179	0.0384671	0.0565448	0.0122365	0.0531017	0.0679611	0.064199	0.00716708	0.0165833	0.0868794	0.00832014	0.0715899	0.0525113	0.0872623	0.286752	0.0574896	0.0487957	0.103128	0.0946914	0.238885	0.0641892
262,0964@1,6	0.0178276	0.0195639	0.0336168	0.02773	0.0141158	0.0266726	0.0183448	0.0104202	0.0224277	0.0297074	0.0156013	0.028197	0.0160223	0.0134669	0.0309608	0.00993078	0.028188	0.0142419	0.0281893	0.0081823	0.0273579	0.0275557	0.0124707	0.016602	0.0213419	0.0474982	0.0395246	0.0460358	0.0880775	0.0257833
266.01@1.1	0.0101605	0.0371698	0.0228006	0.0158721	0.00573319	0.0115657	0.0101471	0.00506292	0.015234	0.0265974	0.00824451	0.0154722	0.00656519	0.00703097	0.0148437	0.00373001	0.0176784	0.00674974	0.0170497	0.0040911	0.00904208	0.0120333	0.00693012	0.0218697	0.00902863	0.0267368	0.0280904	0.0171751	0.0516701	0.0117033
267,0967@1,6	0.0606818	0.0789136	0.31958	0.149266	0.0985478	0.209078	0.163194	0.0431776	0.147225	0.412308	0.0438808	0.255011	0.0823949	0.194484	0.158417	0.535925	0.131483	0.193757	0.626302	0.0378844	0.288203	0.086088	0.0718073	0.261004	0.232274	0.200088	0.330094	0.0843963	0.611629	0.148258
271.962@1.7	5.16694	16.2619	9.50149	5.98802	3.09059	2.70064	4.3602	3.37261	10.5687	15.4766	1.36123	7.10489	2.86655	1.91271	7.30293	1.93372	5.39849	1.9058	5.22609	1.26533	2.20847	5.15836	8.95099	25.7359	1.92808	3.06496	18.0895	8.86098	23.6606	2.63231
274.046@6.1	0.00874045	0.0397181	0.0214352	0.0180768	0.00874943	0.0180071	0.00788397	0.00623531	0.0199596	0.0272947	0.00981809	0.0121302	0.00382599	0.00850501	0.0108827	0.0118713	0.0287443	0.0157992	0.0150549	0.00649477	0.0261989	0.0114282	0.00827517	0.0379339	0.0180974	0.0226435	0.025601	0.0174478	0.0597454	0.0147495
277.062@5.1	0.00785899	0.0145437	0.0141145	0.0127693	0.00722191	0.0108064	0.00587844	0.0039223	0.00809794	0.00900593	0.00477688	0.0050048	0.00472863	0.00620263	0.00965661	0.00901618	0.0120774	0.00771629	0.0118047	0.00229158	0.00950696	0.00695402	0.00872693	0.0209134	0.00985986	0.0189733	0.0161065	0.0137349	0.0194508	0.00641189
280.047@1.8	0.0188046	0.111638	0.0829078	0.063761	0.0293515	0.114808	0.023178	0.00886962	0.0586172	0.0227577	0.0172056	0.0531524	0.0199897	0.0183131	0.0590917	0.0454575	0.0376942	0.0447031	0.111151	0.0533438	0.0306815	0.0266652	0.0294526	0.0534094	0.19876	0.0326714	0.0568466	0.0313274	0.0593825	0.0216575
282.062@6.1	0.342609	1.00369	0.872118	0.652831	0.218866	0.0687666	0.418875	0.184608	0.956719	1.06354	0.121161	0.652262	0.222144	0.182995	0.552482	0.170187	0.482641	0.164094	0.352787	0.0780868	0.200214	0.461894	0.742489	1.49882	0.153393	0.31912	1.79522	0.0747754	1.79594	0.226821
282.062@6.2	0.342175	1.04651	0.89484	0.628727	0.205999	0.189489	0.402119	0.188049	0.9201	1.1024	0.120394	0.675513	0.214866	0.186004	0.559468	0.174463	0.459125	0.170655	0.370959	0.0809668	0.203386	0.474096	0.786025	1.57651	0.146641	0.309186	1.84031	0.0733118	1.83386	0.232765
284.022@1.1	0.00220169	0.00699026	0.00600792	0.00307725	0.00139142	0.00750731	0.00386785	0.00138927	0.00385368	0.00418656	0.00602751	0.00406514	0.0016155	0.00241216	0.0015993	0.00424524	0.00736663	0.00346824	0.00681221	0.00239666	0.00475715	0.0033063	0.00576475	0.0187605	0.00781314	0.0229493	0.0283246	0.00134897	0.0109269	0.00638067
284.038@1.9	0.221501	0.573795	0.430362	0.249773	0.131563	0.120089	0.18277	0.133463	0.438608	0.621731	0.0945492	0.349396	0.136073	0.130164	0.288423	0.109924	0.217193	0.109566	0.264492	0.0633078	0.147639	0.172891	0.369901	0.963102	0.129719	0.190576	0.978226	0.298931	0.739956	0.167535
289.976@6.2	0.00720807	0.00619945	0.0243277	0.0122824	0.00433613	0.0156318	0.00471761	0.00342552	0.000629124	0.00767472	0.00891266	0.000440252	0.00484488	0.00492549	0.00987833	0.00649239	0.0100047	0.00874988	0.0138938	0.00299313	0.00942791	0.0049278	0.00647603	0.01012	0.00620897	0.0115604	0.0073926	0.00245939	0.00960889	0.00326656
2912.2@1.9	0.390644	0.801269	0.843585	0.425578	0.247762	0.241636	0.352476	0.239849	0.694586	1.03576	0.208284	0.644615	0.246195	0.274182	0.438381	0.272662	0.442644	0.231663	0.573718	0.122925	0.341792	0.232503	0.594088	1.18995	0.296722	0.379161	1.7842	0.375709	0.945864	0.343876
2914.197@1.9	0.340008	0.693242	0.736921	0.36854	0.216464	0.210513	0.304244	0.207312	0.597678	0.896059	0.180426	0.558059	0.211929	0.23739	0.375976	0.23874	0.384393	0.200199	0.501328	0.107086	0.178738	0.197976	0.513442	1.01865	0.258434	0.32942	1.54987	0.320033	0.809436	0.298447
2924.184@1.9	0.258595	0.550985	0.542269	0.379045	0.174613	0.160531	0.226669	0.155962	0.468053	0.694105	0.133636	0.416387	0.160975	0.17394	0.380325	0.177488	0.295627	0.150128	0.372551	0.0818877	0.22069	0.161133	0.400383	0.814551	0.187664	0.244124	1.16116	0.261782	1.21321	0.217381
2926.179@1.9	0.353697	0.762813	0.742587	0.404354	0.222876	0.219527	0.321178	0.21803	0.831462	0.960695	0.189047	0.586656	0.231783	0.24598	0.411154	0.242496	0.411121	0.209043	0.510885	0.111288	0.302422	0.465414	0.728308	2.19514	0.259111	0.342891	1.60416	0.371114	0.926999	0.302717
2928.176@1.9	0.288223	0.549045	0.502899	0.276428	0.154048	0.149776	0.217832	0.149755	0.454962	0.662964	0.125135	0.398527	0.157897	0.162922	0.282481	0.16039	0.278247	0.14194	0.33842	0.0749186	0.201697	0.296991	0.386311	0.823252	0.17073	0.225213	1.07259	0.263271	0.641454	0.203275
296.058@6.1	0.0195035	0.0383916	0.0356257	0.0259728	0.0131484	0.0140947	0.0161597	0.0117753	0.0292591	0.0365586	0.0102668	0.0208063	0.0104534	0.0072165	0.0242991	0.00978521	0.0220758	0.0119532	0.0244474	0.0051421	0.0111857	0.0149622	0.0163433	0.0283608	0.00781366	0.0132562	0.0627251	0.021931	0.0610433	0.0150806
296.152@6.1	0.11426	0.0452749	0.119926	0.0695809	0.0892312	0.146491	0.0688302	0.0489333	0.102388	0.100679	0.0581749	0.0811998	0.0620431	0.0975645	0.1602	0.141831	0.0807651	0.0684976	0.182337	0.0210759	0.161905	0.0549641	0.0694494	0.0845522	0.0869043	0.291329	0.217741	0.159196	0.138171	0.0918852
298.981@5.9	0.0477476	0.0492002	0.342129	0.339241	0.140211	0.274384	0.100215	0.0305513	0.0698732	0.0476291	0.0750641	0.0138155	0.0244876	0.132436	0.107381	0.0539587	0.666134	0.212222	0.420613	0.0536272	0.146234	0.328303	0.0774246	0.124879	0.321332	0.568773	0.26897	0.125367	0.266226	0.0904979
299.282@3.6	0.433967	0.878371	0.577953	0.779739	0.276722	0.186673	0.343423	0.246244	0.89582	1.22838	0.0682931	0.659687	0.385905	0.209446	0.742668	0.0775495	0.602519	0.116882	0.52489	0.163515	0.184675	0.369388	0.750121	2.09603	0.150982	0.236939	1.73144	0.620917	1.70392	0.203977
299.998@4.6	0.0693275	0.10863	0.0622099	0.0279353	0.0300222	0.0333739	0.0356775	0.0256853	0.0814212	0.077854	0.0296013	0.0491132	0.0319087	0.0435363	0.084834	0.0499811	0.0305232	0.0355224	0.0546	0.00944813	0.0442827	0.0178587	0.0469596	0.161014	0.0360742	0.0720371	0.13084	0.0789128	0.113338	0.0511043
299.998@6.6	0.00740135	0.060538	0.0639353	0.0238141	0.0188113	0.0334673	0.0123158	0.0090651	0.019793	0.0409156	0.0210012	0.0156076	0.00936912	0.0173533	0.0189301	0.0136826	0.034666	0.0314972	0.0148808	0.0130042	0.0225953	0.0217234	0.0305332	0.115743	0.0472243	0.0738009	0.0868476	0.0366459	0.136401	0.0158883
2-amino-4'-hydroxy-Propiophenone	0.0163182	0.0140904	0.0291489	0.0347071	0.0226645	0.049804	0.0175574	0.0082702	0.0142666	0.0125258	0.0162318	0.00525219	0.0171442	0.0229378	0.0357008	0.0243068	0.0374825	0.0303638	0.047659	0.00862096	0.0445146	0.0178956	0.0318392	0.0388574	0.0350389	0.089526	0.0440475	0.0405881	0.014943	0.024442
3,9,15-Docosatriynoic acid	0.0242434	0.0642323	0.0462354	0.0581015	0.01838	0.0464495	0.029435	0.019676	0.0592949	0.0571121	0.0125376	0.0304216	0.015638	0.0297048	0.0381374	0.0334092	0.0646185	0.0223743	0.0852331	0.00616057	0.0294028	0.0179888	0.0472262	0.163814	0.0386147	0.0319487	0.129682	0.071584	0.105672	0.0270112
301.297@4	0.0245064	0.0799105	0.0463867	0.0740854	0.0160506	0.0253319	0.0367579	0.0222611	0.0853738	0.11317	0.0100136	0.0355012	0.0342438	0.0157301	0.0449062	0.0111188	0.0552515	0.018213	0.0553108	0.0138264	0.0239775	0.0531354	0.0683315	0.122761	0.0107544	0.0257155	0.140909	0.0768132	0.161051	0.0160045
302,2255@07	0.0161355	0.0334223	0.0226487	0.0177548	0.00872084	0.00993381	0.014913	0.0129407	0.0249343	0.0184735	0.00800169	0.0240547	0.0125809	0.00998021	0.0134139	0.00820534	0.0166013	0.0110941	0.0243071	0.00358632	0.00877373	0.00847162	0.0300181	0.0740211	0.0159172	0.00865368	0.103035	0.0142028	0.0402703	0.012874
305.061@3.9	0.028483	0.021106	0.0468709	0.0417665	0.0318783	0.062325	0.0214289	0.0146015	0.0211917	0.0171496	0.0195803	0.0099072	0.0222362	0.0284454	0.0531393	0.0344007	0.0489956	0.0353357	0.0510731	0.0109236	0.05008	0.0228953	0.0402859	0.036622	0.0486432	0.10919	0.0528826	0.0367886	0.0240239	0.0322565
306.032@9.5	0.00702477	0.0211108	0.00746867	0.00529723	0.00449664	0.0114571	0.00142284	0.00395135	0.0108627	0.0131349	0.0124776	0.00283727	0.00281294	0.0124964	0.00884569	0.0200697	0.00423585	0.00450991	0.0113098	0.000497739	0.0186175	0.00482302	0.0132269	0.0757146	0.0221031	0.0122737	0.0324763	0.0183246	0.0915325	0.015368
307,0835@6,4	0.586115	3.33537	1.44703	1.85005	0.711858	3.91864	0.281576	0.0978102	0.965432	1.84806	0.806881	0.897377	0.00917584	0.412563	0.225175	0.0298685	3.34902	1.57945	2.17158	0.633017	0.6581	1.2892	0.0553141	4.00477	2.98484	7.08185	0.13827	0.566258	2.97677	0.591026
308,2709@0,7	0.0243262	0.0477575	0.0241833	0.028832	0.0100795	0.0151453	0.0189864	0.00794075	0.0275357	0.0412585	0.00790482	0.0159355	0.0146225	0.012634	0.0222782	0.016119	0.0213136	0.0411341	0.0270566	0.0043418	0.0174095	0.019024	0.0300023	0.117285	0.0138745	0.0243972	0.0628144	0.0431682	0.05099	0.0125363
314,0861@0,7	0.00228954	0.00912125	0.00341046	0.00585552	0.00122846	0.00163654	0.000349998	0.000366291	0.00550819	0.0135347	0.00232173	0.0031464	0.00130586	0.00177607	0.00153872	0.000862269	0.00363553	0.00294867	0.00184256	0.00136488	0.000675527	0.000767356	0.00373557	0.0192503	0.00122668	0.00336099	0.0203929	0.00628846	0.0289426	0.0036355
3159.062@2	0.0402207	0.127136	0.0975189	0.0519993	0.0267242	0.0296949	0.0402607	0.0279537	0.0797597	0.112283	0.0272769	0.0685983	0.0245064	0.0300562	0.0480787	0.0317969	0.0587167	0.0269476	0.0572218	0.0134433	0.042044	0.0305496	0.0467326	0.166116	0.0398743	0.0516796	0.214366	0.0533892	0.139849	0.0421849
317,1407@6,1	0.164118	0.435696	0.16057	0.126579	0.125398	0.167721	0.099972	0.0701496	0.15205	0.133962	0.082425	0.10321	0.0854863	0.12697	0.224971	0.154156	0.105425	0.0870218	0.241421	0.0324355	0.179872	0.0761943	0.104973	0.670903	0.111592	0.294771	0.29049	0.263117	0.220555	0.118031
318.008@6.6	0.0152468	0.0338053	0.114414	0.0425897	0.0339594	0.0592644	0.0191427	0.0153415	0.041163	0.0190193	0.0362591	0.0134372	0.0168958	0.0325867	0.0341187	0.0268597	0.0568292	0.0583856	0.0262615	0.0238538	0.0399416	0.0396048	0.0163479	0.0328242	0.0829376	0.135824	0.0684783	0.0379372	0.0493425	0.0262689
318.009@4.6	0.0830569	0.0953386	0.0852905	0.049875	0.0348365	0.038899	0.0449584	0.0278132	0.0724675	0.0865841	0.0331801	0.0485986	0.0383847	0.0412567	0.0857223	0.0591379	0.0293118	0.0231501	0.0611463	0.00709781	0.0518807	0.0260827	0.0353261	0.0792626	0.039441	0.0830192	0.13317	0.0710273	0.127844	0.0505204
318.009@5	0.103247	0.087859	0.0810728	0.0426985	0.047473	0.0479003	0.0548379	0.0378798	0.089877	0.0940586	0.0293098	0.0648992	0.0446027	0.0460141	0.102039	0.0700384	0.0421002	0.0290327	0.0788518	0.00922274	0.0536464	0.0306772	0.0426433	0.098339	0.034186	0.0983426	0.176833	0.0695289	0.0937291	0.064174
320.035@6.9	0.125795	0.239169	0.42482	0.299527	0.162826	0.217953	0.219639	0.0865386	0.163763	0.231292	0.137815	0.141067	0.126596	0.189814	0.235772	0.128275	0.270259	0.100522	0.316715	0.0701238	0.181049	0.160899	0.188979	0.251469	0.283317	0.642912	0.539354	0.209029	0.40037	0.205207
321.02@6.6	0.0296492	0.051592	0.180796	0.131645	0.0715633	0.220328	0.0420252	0.0216101	0.0470382	0.047524	0.0405391	0.0243601	0.019391	0.0309037	0.0439638	0.0517057	0.204372	0.0591498	0.117958	0.0299422	0.0938934	0.0686387	0.0444776	0.0729667	0.180037	0.333628	0.103638	0.0819247	0.0569919	0.0393005
322.144@6.1	0.00750878	0.012585	0.0101877	0.00800437	0.00539161	0.00672331	0.00488246	0.00316367	0.00918331	0.0103558	0.00327707	0.00513128	0.00330537	0.00376393	0.00941952	0.0062463	0.00652464	0.00371379	0.00926827	0.00168946	0.00690839	0.00497073	0.00509179	0.0153992	0.00423609	0.0122277	0.0158191	0.00896092	0.0155678	0.00530233
323.017@4.5	0.0208333	0.048329	0.0362459	0.0318523	0.0211974	0.0216285	0.0187537	0.0106954	0.037659	0.0381848	0.0105179	0.0205589	0.0145168	0.0181704	0.0286915	0.0172638	0.0309192	0.0215111	0.0176095	0.0068658	0.0175492	0.0203465	0.0269667	0.0818077	0.0291769	0.0606194	0.0686279	0.0377577	0.0421939	0.0176162
327.994@1.1	0.540929	1.08076	0.598265	0.391326	0.204115	0.258312	0.282328	0.248244	0.79074	0.89713	0.161926	0.588616	0.221685	0.21076	0.48442	0.226773	0.357142	0.209527	0.448735	0.090461	0.258241	0.281309	0.525466	1.45055	0.165645	0.45961	1.41691	0.580112	1.54569	0.257145
330.099@2.9	0.0380003	0.0260124	0.0753809	0.0237796	0.0144038	0.0159769	0.019277	0.0147567	0.0331706	0.0468232	0.0126064	0.0378551	0.0164884	0.0168629	0.0182065	0.0223441	0.0425234	0.0188474	0.0444209	0.00872938	0.0209147	0.00491308	0.014541	0.0193913	0.0205185	0.0213242	0.113841	0.00965336	0.0298591	0.0204402
331.927@2.3	0.120899	0.497308	0.278572	0.193998	0.081104	0.0790776	0.10801	0.0768433	0.281769	0.446067	0.0506449	0.170361	0.0598674	0.060375	0.173441	0.0506241	0.184125	0.0689321	0.115112	0.0350526	0.0755909	0.131475	0.135673	0.555358	0.0652759	0.116964	0.577773	0.217031	0.665436	0.0968354
333.924@2.3	0.0414611	0.167626	0.0894737	0.0626036	0.0259053	0.0253187	0.0346551	0.0256681	0.0946786	0.147466	0.0179895	0.054643	0.0194815	0.0195381	0.0550366	0.016091	0.0618875	0.0214061	0.0377781	0.0109883	0.025736	0.0482048	0.0439506	0.188392	0.0213116	0.0390792	0.18788	0.0704415	0.227054	0.0311994
334.068@6.7	0.0224448	0.0570927	0.0513923	0.0250304	0.0124338	0.0443997	0.0149548	0.0107227	0.0333797	0.0394667	0.0100045	0.0198137	0.0163299	0.0236199	0.0225004	0.0131039	0.0248815	0.0173439	0.0270427	0.0103611	0.0238834	0.0155329	0.01405	0.050873	0.0325357	0.0441053	0.0387144	0.0517138	0.0672311	0.0143342
334.087@6.1	0.0869808	0.0952527	0.112443	0.0747187	0.0545431	0.0768951	0.0473373	0.0355538	0.076657	0.0841464	0.0359381	0.0484596	0.0337934	0.0428471	0.0828932	0.0899715	0.0752959	0.0456749	0.0994393	0.0167078	0.0798514	0.0417414	0.0420206	0.071998	0.0498568	0.133938	0.155014	0.0571724	0.137563	0.0550249
335.018@1.3	0.0148545	0.0284192	0.0262885	0.0208737	0.0121819	0.0163835	0.013411	0.00573649	0.0108337	0.021129	0.00905727	0.0124272	0.00919216	0.0135863	0.0165811	0.0144429	0.0171556	0.0093876	0.0197497	0.00265111	0.0233765	0.00617314	0.0178942	0.0659844	0.0160079	0.0273631	0.0553111	0.00915702	0.0494445	0.0132866
335.046@1.9	0.563954	1.43577	1.12597	0.663428	0.359339	0.329057	0.491933	0.349039	1.1219	1.66798	0.255463	0.934848	0.36751	0.353223	0.733302	0.302488	0.616489	0.302141	0.726474	0.165068	0.404118	0.445761	0.929694	2.25815	0.351023	0.503331	2.51511	0.776508	1.77107	0.447481
337.151@4.5	0.00447578	0.0107665	0.00472661	0.00465966	0.00310167	0.00343897	0.00270055	0.00156149	0.00699805	0.00715009	0.00174572	0.00358381	0.00295635	0.00342709	0.0052023	0.00361022	0.00445676	0.00364292	0.00296817	0.00112774	0.00281196	0.00268805	0.00373353	0.017217	0.00514517	0.0121081	0.0102309	0.00682233	0.0154915	0.00254675
339,0449@3,7	0.0268813	0.0459145	0.041033	0.0452242	0.0255202	0.0419897	0.0193661	0.0126596	0.0345909	0.0316765	0.0132719	0.0145526	0.0177184	0.0192894	0.0407302	0.020775	0.042291	0.0295406	0.0420846	0.00856387	0.0324362	0.0252369	0.042815	0.0672754	0.027146	0.0713208	0.0586183	0.055719	0.058403	0.0222677
339.04@1.9	0.289457	0.728765	0.567016	0.341319	0.183985	0.161309	0.243015	0.174805	0.563126	0.826282	0.125987	0.486978	0.184113	0.177088	0.363463	0.150456	0.308961	0.149148	0.361525	0.0806497	0.203374	0.228735	0.465595	1.15435	0.172079	0.246683	1.26635	0.396187	0.92733	0.222901
343.002@6.6	0.00624354	0.0228177	0.0169312	0.0122326	0.00832662	0.0218338	0.0057013	0.00278196	0.0117446	0.0130566	0.00580701	0.00641351	0.0028552	0.00398387	0.0111136	0.00618177	0.0210716	0.00663775	0.0137744	0.00330045	0.0114644	0.00726526	0.00511147	0.0229601	0.0196473	0.0348071	0.0180569	0.00918291	0.0411399	0.00488719
343.977@9.5	0.0423986	0.0628125	0.106538	0.0333836	0.025941	0.0349909	0.0447507	0.0262606	0.0592391	0.0949787	0.0362402	0.0826051	0.0286991	0.0472471	0.0456392	0.0540061	0.0548777	0.032161	0.0823736	0.0161325	0.0648623	0.0219147	0.0600752	0.08198	0.056796	0.0627296	0.257697	0.0363311	0.0881235	0.0594096
348.052@6.9	0.0195906	0.0379942	0.0298422	0.0316146	0.0205973	0.0153371	0.0165174	0.00855301	0.0188086	0.0345688	0.0132293	0.0135931	0.00960549	0.00746547	0.0268399	0.0073992	0.026322	0.0196871	0.0127537	0.0070223	0.0169844	0.0280687	0.0155363	0.0279981	0.00996526	0.0299792	0.0366395	0.030141	0.0396699	0.0124175
355.04@5.1	0.00589734	0.0156497	0.00788324	0.0238922	0.018144	0.0387019	0.009519	0.00358768	0.0105583	0.00850317	0.016429	0.00595856	0.0112971	0.0210686	0.0223005	0.0264189	0.0225263	0.0239002	0.0292709	0.00712395	0.0359267	0.00449925	0.00706715	0.0191114	0.0359881	0.0886962	0.00455942	0.0183339	0.0225844	0.024608
358,142@6,1	0.0231751	0.0436055	0.0311336	0.0222716	0.01339	0.0147491	0.0164263	0.00977741	0.024775	0.0415372	0.00785185	0.0164509	0.00887853	0.00861969	0.0262198	0.0138632	0.0195998	0.00879359	0.020682	0.00432956	0.0154418	0.012644	0.0170474	0.0507079	0.00915793	0.0237059	0.0531087	0.020879	0.0491559	0.0118597
361.137@5.1	0.00650045	0.0153413	0.00947172	0.00672015	0.00413957	0.00627095	0.00295546	0.00219933	0.00518237	0.00938649	0.00393051	0.00382717	0.00370543	0.00619638	0.00835611	0.0103912	0.00348837	0.00353286	0.00647053	0.000905512	0.00881935	0.00395286	0.00382033	0.0215272	0.00742482	0.0187676	0.0109375	0.0136048	0.0257101	0.00586969
365.043@5.4	0.0646207	0.0518207	0.102716	0.0857527	0.0660326	0.082145	0.0400991	0.0281044	0.0835239	0.0773938	0.0363164	0.053105	0.0416034	0.0547323	0.112418	0.0787553	0.0787174	0.0604917	0.105442	0.0227565	0.0904216	0.0531891	0.0999812	0.0636172	0.0879242	0.142153	0.152373	0.0739416	0.115861	0.0477426
370.135@2.2	0.0580606	0.25596	0.138682	0.0925199	0.0370195	0.0383635	0.052682	0.0365901	0.136154	0.207164	0.0270173	0.0849396	0.0304431	0.0304712	0.0790099	0.0266215	0.081462	0.0346072	0.0621913	0.0179081	0.0393595	0.0643142	0.0658609	0.262038	0.0345829	0.0593226	0.275945	0.114406	0.307695	0.043921
370.136@1.8	0.0155406	0.0723973	0.0305491	0.0210727	0.00886693	0.00826609	0.0115539	0.00837221	0.0312436	0.0500425	0.0056189	0.021413	0.00722546	0.00634297	0.0201585	0.00644355	0.0169892	0.00709491	0.0131705	0.00379613	0.00875798	0.0162826	0.0153646	0.0716145	0.00779603	0.0137085	0.0551047	0.0279627	0.0836058	0.00963642
372.027@1	0.100922	0.0532155	0.322995	0.125384	0.119363	0.101453	0.0484999	0.094146	0.0552994	0.16292	0.0988844	0.0530929	0.0517103	0.0967095	0.152694	0.0941374	0.0639365	0.185122	0.0657129	0.024509	0.0905782	0.0365062	0.0501136	0.440667	0.0782902	0.123902	0.0896137	0.0742585	0.351794	0.0417457
376.958@5.9	0.0333705	0.0466378	0.20904	0.214526	0.0919109	0.180951	0.0728377	0.024279	0.0574446	0.0453683	0.0520441	0.0145665	0.0219107	0.0872527	0.073287	0.0324446	0.371717	0.121363	0.262974	0.0365886	0.0970406	0.219271	0.0575262	0.0430619	0.198366	0.357528	0.209388	0.101541	0.221055	0.0674341
377.974@5	0.051026	0.08857	0.059617	0.027294	0.0241984	0.031747	0.0330555	0.0211375	0.0710145	0.0708867	0.0207712	0.0368283	0.0220805	0.0296191	0.0652393	0.038437	0.0211377	0.0177179	0.0400667	0.00549272	0.0351181	0.0232898	0.0320678	0.10201	0.026132	0.0629887	0.0918538	0.041072	0.100027	0.0357317
378.056@4.1	0.00579002	0.0113166	0.0109499	0.0103234	0.00631201	0.0084064	0.00422471	0.00299603	0.00558908	0.00922929	0.00338666	0.0040068	0.00384563	0.00469061	0.00963536	0.00638401	0.0097867	0.00571958	0.00819412	0.00219823	0.007086	0.00640031	0.00813285	0.0192744	0.00795486	0.0170244	0.0113723	0.0118922	0.0187357	0.00548251
381.074@3.9	0.216577	0.176911	0.281832	0.201741	0.152059	0.304421	0.117876	0.0903431	0.185799	0.173663	0.103889	0.122616	0.132064	0.182552	0.363162	0.18923	0.203577	0.168905	0.305874	0.052837	0.27629	0.126683	0.342775	0.193036	0.247736	0.444326	0.396387	0.238635	0.278069	0.155488
383,038@3,9	0.00923387	0.0145797	0.0127043	0.0121695	0.00662726	0.0119899	0.00532178	0.00425526	0.0115438	0.0118001	0.00393541	0.00604582	0.00487409	0.00510108	0.0133444	0.00671746	0.0115185	0.00641968	0.0106696	0.0024322	0.00916279	0.00801124	0.00973155	0.022117	0.00790248	0.0191131	0.0167478	0.013767	0.0149071	0.00587277
384.151@2.2	0.0608343	0.237186	0.135593	0.0934295	0.0395205	0.0376422	0.0547829	0.0354615	0.127408	0.203255	0.0261698	0.0887485	0.0295265	0.030127	0.0829624	0.0273038	0.0784603	0.0357513	0.0636065	0.0176348	0.039276	0.0645964	0.0680435	0.253085	0.0341138	0.0583193	0.270542	0.111632	0.298215	0.0456309
387.309@2.1	0.203164	0.565062	0.342745	0.154604	0.104681	0.102218	0.132946	0.100617	0.388458	0.579317	0.0659951	0.223192	0.10289	0.0974695	0.171929	0.0955572	0.191888	0.107703	0.218947	0.0455373	0.101309	0.124489	0.327654	1.06483	0.0966227	0.129652	0.723939	0.347463	0.817598	0.139037
388.049@1.9	0.469844	1.23166	0.95263	0.571683	0.302266	0.280154	0.431797	0.296627	0.952784	1.40237	0.223625	0.786509	0.313511	0.302931	0.620748	0.265522	0.52973	0.25856	0.618444	0.144521	0.347251	0.378192	0.815265	1.93372	0.306113	0.43698	2.18879	0.645615	1.59302	0.378839
389.022@7.7	0.00811962	0.0154266	0.0209454	0.0136333	0.00461728	0.00708245	0.00493577	0.00338362	0.00907796	0.0116305	0.0038584	0.0056557	0.00744968	0.00594885	0.0098512	0.00335503	0.00612191	0.0162204	0.0059789	0.00210882	0.00648707	0.00320476	0.00491389	0.018269	0.00618731	0.00944654	0.0199889	0.0118484	0.0148309	0.00704997
390.046@1.9	0.3996	1.03661	0.804021	0.482594	0.257472	0.23668	0.366847	0.253562	0.799687	1.18102	0.188684	0.669784	0.262535	0.255834	0.525354	0.226201	0.449533	0.218505	0.517335	0.121971	0.293138	0.317453	0.685407	1.6203	0.258753	0.369219	1.86687	0.540077	1.33342	0.321836
392.13@6.1	0.148492	0.164801	0.165058	0.131855	0.0784182	0.0740364	0.09293	0.0768201	0.186147	0.195149	0.0397351	0.122153	0.0642341	0.0541088	0.154353	0.0662542	0.103362	0.0501097	0.144254	0.0271686	0.0745406	0.0956484	0.143241	0.23826	0.0469655	0.10636	0.33395	0.191422	0.283778	0.0750631
395.985@5	0.0409838	0.0452205	0.0394206	0.0182406	0.0165373	0.0198587	0.0209277	0.0149566	0.0472033	0.043148	0.0144999	0.0238589	0.0197572	0.0200588	0.0471708	0.0282213	0.0180798	0.0128537	0.030668	0.00385799	0.0227833	0.0109522	0.0177196	0.0482265	0.0184	0.0407972	0.0632973	0.0327816	0.0627574	0.0254407
397.034@6.8	0.0150399	0.101099	0.0856458	0.0687397	0.0408204	0.101709	0.0143642	0.00460575	0.063404	0.0888854	0.016612	0.0390411	0.0164652	0.016052	0.0070874	0.0207814	0.104456	0.0164711	0.0589846	0.0141585	0.0339362	0.0264569	0.0072405	0.207288	0.0483356	0.0306799	0.127457	0.0229871	0.138622	0.0161077
397.035@6.8	0.0479854	0.0965649	0.128438	0.108582	0.0566443	0.112057	0.0385858	0.0432772	0.151687	0.207229	0.0241771	0.0898823	0.0260346	0.0241331	0.0943083	0.031465	0.132562	0.0320243	0.08814	0.0222093	0.0466805	0.0632512	0.127217	0.375725	0.030007	0.102272	0.258738	0.0815564	0.116479	0.0318683
398.012@6.9	0.050073	0.102054	0.166449	0.106786	0.0708413	0.135142	0.0708113	0.0427224	0.0820311	0.0960207	0.0478993	0.0567809	0.048306	0.074673	0.0966056	0.0752292	0.12417	0.0794402	0.149976	0.0305824	0.118408	0.0682972	0.0830682	0.112691	0.116002	0.219808	0.209668	0.0714746	0.151232	0.0838372
398.167@2.2	0.0396427	0.179767	0.107343	0.0681116	0.0283511	0.0279946	0.0380744	0.02707	0.0899147	0.143349	0.0190027	0.0638577	0.0226926	0.0204777	0.0535048	0.0183315	0.0556993	0.025767	0.0475294	0.0133833	0.0327186	0.0479885	0.0476879	0.185035	0.0258607	0.0423684	0.199763	0.0749184	0.21463	0.0328527
398.997@6.6	0.034167	0.0616571	0.14711	0.117519	0.066277	0.183531	0.0425662	0.0223313	0.0387991	0.0547106	0.0430496	0.023465	0.0221283	0.0334926	0.0518679	0.0417849	0.160801	0.0514428	0.114964	0.02785	0.0889426	0.068579	0.0477666	0.0535167	0.15415	0.280745	0.118554	0.075973	0.110468	0.0391592
399.335@3.5	0.11703	0.97099	0.168806	0.355714	0.178995	0.35304	0.190144	0.493242	0.191088	0.451299	0.148446	0.100797	0.0736918	0.274493	1.31464	0.258264	0.485581	0.0649857	0.581742	0.0214902	0.36628	0.690376	0.428629	1.32397	0.148481	0.441723	0.293617	0.19725	0.32549	0.173868
3-Dehydroquinic acid	0.0148116	0.0376894	0.0505054	0.0424409	0.0168109	0.0392326	0.0167313	0.00764185	0.0177311	0.0255962	0.0204659	0.00752308	0.00615749	0.0120456	0.0223195	0.0136281	0.0164074	0.0145878	0.0308358	0.00767508	0.0194107	0.0281419	0.0191295	0.0521802	0.0514096	0.0653927	0.0445728	0.0221547	0.0891197	0.0173701
3-oxo-4-pentenoic acid	0.0168677	0.0225045	0.0139506	0.00850972	0.00768071	0.00816496	0.00944489	0.00520043	0.0199773	0.0204346	0.00680859	0.0125736	0.00811598	0.00990321	0.0215994	0.0123315	0.0100527	0.00581238	0.0144863	0.00191525	0.0110314	0.00582016	0.00768486	0.0234804	0.00901704	0.0181284	0.0326265	0.0130611	0.0269509	0.0122725
4,7,10,13,16-docosapentaenoic acid	0.0180075	0.0342827	0.0356305	0.0288575	0.00904843	0.0217349	0.0171538	0.0109234	0.0304177	0.0252423	0.00744123	0.0191495	0.00990116	0.0188637	0.0211107	0.0187452	0.0321168	0.0515716	0.0512354	0.00589358	0.0272461	0.0150221	0.0267897	0.0907496	0.0273347	0.021923	0.0753045	0.0454502	0.0178917	0.0163107
4,7,10,13-docosatetraenoic acid	0.0154792	0.0354337	0.0257034	0.0254995	0.00913232	0.0138229	0.0135983	0.00612437	0.0224288	0.0164277	0.00553722	0.00750492	0.0129014	0.0124107	0.0168613	0.0147407	0.00991159	0.145677	0.0289822	0.00302967	0.0217877	0.0101661	0.027402	0.145904	0.0166782	0.0215052	0.0502153	0.049962	0.0336644	0.00927845
4,7,10,13-Eicosatetraenoic acid	0.0438469	0.0169793	0.0657403	0.056914	0.0118038	0.0306377	0.034217	0.0268046	0.00186734	0.0159618	0.0270219	0.00763017	0.036252	0.0539417	0.0165604	0.051955	0.0209206	0.0420398	0.140555	0.00182007	0.0976441	0.011625	0.0596994	0.135238	0.0594016	0.0522643	0.0753846	0.0694065	0.0277166	0.0361099
400.229@0.7	0.0383725	0.0906965	0.0658772	0.0514326	0.0155786	0.020397	0.0269557	0.0208503	0.0384988	0.0522104	0.0158425	0.0238962	0.0226522	0.0290953	0.0279085	0.0300489	0.031575	0.0256863	0.0762529	0.00490591	0.0507198	0.0166111	0.019047	0.0738163	0.0302216	0.0320755	0.0384831	0.0527315	0.0415101	0.0205035
411.03@1.3	0.0250408	0.18168	0.0436082	0.0675421	0.0297533	0.0444885	0.0322224	0.0133909	0.096736	0.150645	0.0257224	0.0643075	0.0306566	0.0449453	0.0347487	0.0408208	0.0330484	0.0201002	0.0687814	0.0081485	0.0640647	0.0138844	0.0901623	0.305696	0.0509102	0.0850541	0.189547	0.0931979	0.229927	0.0352505
412.065@6.1	4.73699	5.16665	6.25608	4.7637	3.5638	5.01697	3.20423	2.30693	5.0502	5.66109	2.43942	3.3013	2.34064	2.94475	6.02532	4.01937	4.07313	2.63872	6.13625	1.08038	5.04644	2.97921	2.95332	5.05108	3.3366	8.35825	10.4073	0.213234	9.03213	3.65697
415.058@3.7	0.0869254	0.0983502	0.128465	0.0963683	0.0726968	0.135899	0.0748934	0.0408631	0.10239	0.0911754	0.0516942	0.0643402	0.060451	0.0808046	0.148272	0.089998	0.0999454	0.0974716	0.146351	0.0255347	0.120445	0.0663855	0.193567	0.457557	0.111459	0.203097	0.176843	0.176737	0.120666	0.0738336
416.06@6.1	0.0310208	0.0374392	0.0412683	0.0262285	0.0228581	0.0321894	0.0211234	0.015083	0.0332826	0.0374806	0.0147586	0.0219183	0.0147271	0.0189337	0.0401546	0.0265963	0.0281721	0.0132029	0.0403825	0.0073078	0.026086	0.0199748	0.0209189	0.0387605	0.0215926	0.0556383	0.0730442	0.0227981	0.0621791	0.0239746
424.23@0.7	0.00229634	0.00757121	0.0051995	0.0108589	0.00120617	0.0122967	0.00502615	0.00120334	0.00503568	0.00360612	0.00315695	0.00134428	0.00190067	0.00637008	0.00394371	0.010711	0.0173571	0.0285207	0.0205893	0.00125772	0.0100314	0.00368365	0.00864675	0.0525975	0.0103546	0.00737529	0.0260371	0.00538646	0.0134862	0.00842713
424.95@6.6	0.00475203	0.0181953	0.0105571	0.00727249	0.00465971	0.0117988	0.002489	0.0022143	0.00926641	0.0100005	0.00265471	0.00432039	0.0025586	0.002024	0.00771425	0.00319949	0.00979614	0.00341871	0.00815157	0.00211596	0.00575311	0.00405076	0.00814334	0.0339518	0.0104132	0.0191163	0.0134052	0.0118884	0.0368791	0.00229236
425.35@3.4	0.0265017	0.314086	0.0386213	0.118942	0.0554159	0.143257	0.0740425	0.074089	0.0744926	0.0873754	0.0365586	0.0923241	0.0255669	0.0893449	0.392863	0.0771449	0.207966	0.019196	0.231047	0.00700773	0.177187	0.363806	0.062842	0.437205	0.053982	0.155759	0.133569	0.0675587	0.272661	0.0594977
426.247@0.7	0.0277975	0.0563449	0.0466671	0.0480604	0.0160184	0.0236504	0.022921	0.0133266	0.0425502	0.0524684	0.0100783	0.028638	0.0224586	0.0208597	0.0299406	0.0223746	0.0331357	0.0943128	0.0553316	0.00694734	0.027886	0.0214699	0.0348724	0.114338	0.0276221	0.0321286	0.0953286	0.0608505	0.0508701	0.0187449
427.367@3.4	0.0564332	0.395874	0.186894	0.121092	0.0534774	0.115901	0.0694748	0.35057	0.102823	0.198325	0.0442023	0.0463929	0.0383675	0.0753328	0.387479	0.10278	0.118466	0.0230272	0.130051	0.00843937	0.0986566	0.123533	0.163847	0.529724	0.0408335	0.102217	0.115071	0.096475	0.268302	0.058426
429.373@0.8	0.163821	0.417465	0.18962	0.204328	0.108801	0.0568574	0.0846411	0.0744686	0.267235	0.385645	0.01577	0.133279	0.0625891	0.0364644	0.239164	0.0320893	0.185648	0.0779119	0.117865	0.0310149	0.0360248	0.220548	0.258196	0.380559	0.0241268	0.0549599	0.352312	0.273863	0.213058	0.0357881
431.053@5.1	0.0480232	0.121446	0.0507667	0.0458484	0.0292467	0.0220063	0.0225145	0.0148672	0.0301708	0.0485404	0.0202127	0.0249724	0.027231	0.0332213	0.0578928	0.0395961	0.034157	0.0262309	0.0583373	0.010614	0.0431253	0.0256951	0.055417	0.199836	0.0459073	0.0756909	0.0723621	0.0441539	0.16489	0.0292646
433.016@5.1	0.00904471	0.019976	0.0178162	0.0166103	0.010275	0.0180192	0.00807774	0.00493239	0.0137827	0.0116708	0.00687185	0.00654869	0.00739339	0.00878561	0.0148932	0.0106561	0.0140862	0.0110548	0.0152805	0.00381783	0.0146597	0.0111529	0.017432	0.045072	0.0136175	0.0316098	0.0293574	0.019027	0.0351391	0.0101539
435.034@1.1	0.00470737	0.019515	0.0133455	0.00799964	0.00474304	0.00673431	0.0030835	0.00253694	0.0123806	0.0135339	0.00564112	0.00660628	0.00402545	0.00339604	0.00669853	0.00499845	0.00550932	0.00656529	0.00478586	0.00128528	0.00613489	0.00291047	0.0073862	0.0355783	0.00695196	0.0124401	0.0398168	0.0116658	0.0390377	0.0112078
436.062@1.6	0.0128011	0.0259787	0.0257212	0.0161802	0.00864369	0.0136371	0.010908	0.00651759	0.0171847	0.0248527	0.00740716	0.0177926	0.00919376	0.00689697	0.0185421	0.00588942	0.017874	0.00822569	0.0149397	0.00485161	0.0125298	0.0162428	0.0137594	0.0326508	0.0105985	0.022857	0.0336052	0.027872	0.0549274	0.0136536
437.291@2.9	0.0383346	0.0566874	0.0522791	0.0250893	0.0161067	0.0250272	0.0201852	0.020385	0.0602288	0.0810152	0.0119238	0.0315468	0.0349387	0.0392131	0.0445658	0.0162693	0.0253922	0.0118644	0.0670461	0.00624641	0.0261472	0.0396308	0.048498	0.182299	0.0186691	0.0286508	0.0700978	0.0922211	0.143097	0.0184077
441.052@1.9	1.07454	2.81456	2.15224	1.2854	0.682579	0.647265	0.975194	0.690406	2.15666	3.20433	0.513905	1.86139	0.731469	0.697071	1.43673	0.599148	1.17409	0.584224	1.38761	0.32877	0.811556	0.885477	1.87131	4.48639	0.716693	1.03012	5.06601	1.50063	3.69354	0.899464
441.868@1.9	0.00914735	0.047351	0.00998569	0.0285605	0.00961619	0.0176349	0.0381497	0.00684889	0.0251052	0.0240181	0.00909934	0.0199717	0.00356523	0.00809925	0.0212714	0.00830838	0.0221821	0.0218367	0.0481793	0.00255647	0.0323144	0.0413097	0.00969489	0.0368594	0.00681765	0.0385172	0.097904	0.0204585	0.0411906	0.0200919
443.049@1.9	1.07454	2.81472	2.15224	1.2854	0.682763	0.647265	0.975194	0.690406	2.15666	3.20433	0.513905	1.86139	0.731469	0.697071	1.43714	0.599148	1.17409	0.584224	1.38761	0.32877	0.811378	0.885454	1.86833	4.48484	0.716719	1.03003	5.06601	1.50063	3.69342	0.899464
449.04@1.9	0.150037	0.414395	0.301213	0.178949	0.0933428	0.088846	0.128373	0.0924522	0.311113	0.476537	0.0698861	0.245666	0.101359	0.0927261	0.208326	0.0801293	0.159714	0.077607	0.194121	0.0449531	0.107262	0.196855	0.310066	0.953936	0.0953862	0.138655	0.683835	0.219779	0.757526	0.125545
449.187@6.1	0.129796	0.0931651	0.135333	0.097038	0.093884	0.11022	0.0764116	0.056053	0.125424	0.129724	0.0548103	0.0851813	0.0675267	0.0860736	0.174298	0.0997667	0.0860708	0.0686243	0.175023	0.0244949	0.108738	0.0656891	0.097004	0.151166	0.0780775	0.170567	0.262346	0.175438	0.159943	0.0909143
454.205@0.7	0.00938206	0.026455	0.0124235	0.013826	0.005123	0.00655481	0.00698067	0.00460547	0.0145161	0.0199434	0.00375268	0.00821013	0.00531124	0.00715651	0.00900788	0.00689563	0.00745069	0.0105541	0.0123102	0.00245551	0.0121633	0.0102394	0.0118065	0.0646251	0.00715286	0.0108171	0.0294886	0.0169957	0.0323991	0.00608145
454.935@5.9	0.0105802	0.0337275	0.0695262	0.075361	0.0297061	0.0567554	0.0233584	0.00800814	0.0172847	0.0169219	0.0166309	0.00664643	0.00518383	0.0288274	0.0223432	0.00991151	0.124067	0.037755	0.0854908	0.0114817	0.0320985	0.0764136	0.0176304	0.0413301	0.0632821	0.115695	0.0661528	0.0314466	0.0721075	0.0223045
457.831@6.9	0.0127967	0.0660235	0.0306348	0.0233987	0.00954083	0.00898157	0.0128092	0.0103509	0.0343488	0.0554782	0.00505639	0.0212424	0.00840966	0.00681439	0.0198521	0.00644829	0.0164338	0.0077515	0.0130841	0.00421353	0.0083791	0.0171757	0.0209926	0.0667722	0.00773535	0.0120138	0.058818	0.0324695	0.0839525	0.00958209
472.031@6.1	0.0349101	0.0490573	0.0533436	0.0403902	0.0247555	0.0300154	0.0250142	0.0175242	0.0434925	0.0517732	0.0164757	0.0284222	0.0178986	0.0193064	0.0464653	0.0216652	0.0306692	0.0181072	0.0408759	0.00853927	0.0268028	0.0266707	0.024464	0.0475655	0.0211499	0.0298917	0.0823163	0.0371233	0.0853563	0.0267048
476.001@6.1	0.0169621	0.0174516	0.0198968	0.0171181	0.0142039	0.0193887	0.0130011	0.00957662	0.0181701	0.0180025	0.0101156	0.0129763	0.0100165	0.0139882	0.0254332	0.0149828	0.0157756	0.0104299	0.0232852	0.00425097	0.0202694	0.0103579	0.0129462	0.0205054	0.01453	0.0318213	0.0491947	0.0133747	0.0332244	0.0156481
476.197@6.1	0.0423446	0.0152566	0.0296965	0.0217854	0.0424605	0.131962	0.0208998	0.0150362	0.0185024	0.0146884	0.0502361	0.0130868	0.0227119	0.0681522	0.0503458	0.187066	0.022266	0.0313957	0.0928471	0.00738017	0.187268	0.0109757	0.0107955	0.0192715	0.0729325	0.373983	0.0462025	0.0206721	0.0232099	0.0533644
476.974@6.6	0.0114179	0.0111258	0.0516707	0.0401769	0.0230392	0.0569288	0.0140894	0.0079854	0.012754	0.00842827	0.0137027	0.00734031	0.00810319	0.0116748	0.0180425	0.0138277	0.0505115	0.0182917	0.0387224	0.0109682	0.027672	0.0245028	0.0145306	0.0183966	0.0475044	0.0831072	0.0370829	0.0305058	0.029624	0.0130161
478,2059@0,7	0.0214509	0.0551698	0.0479589	0.0410691	0.0122515	0.0142277	0.0207341	0.0140981	0.0378098	0.0490312	0.0109681	0.0239516	0.0125176	0.0173967	0.0223365	0.016233	0.0213931	0.0203135	0.0431324	0.00393005	0.0279997	0.0135969	0.0389142	0.163547	0.0209002	0.021415	0.116202	0.0395655	0.0816085	0.016806
488.078@6.1	0.538	0.564274	0.559494	0.402602	0.276676	0.154495	0.285473	0.225632	0.548862	0.630958	0.145182	0.378452	0.257156	0.211577	0.649173	0.142904	0.371037	0.197564	0.477713	0.0906703	0.138814	0.302968	0.489889	0.720565	0.195426	0.209514	1.00918	0.616198	0.949931	0.251726
488.107@7.9	0.0403048	0.146629	0.0659271	0.0499955	0.0209746	0.0490662	0.0337676	0.0066087	0.0792849	0.11642	0.00863984	0.0475488	0.02174	0.0115093	0.0182174	0.0262691	0.0642634	0.0289429	0.0467731	0.0102583	0.0250132	0.033999	0.0297955	0.231359	0.067767	0.144031	0.149398	0.022977	0.168404	0.0205153
489.169@6.6	0.00712293	0.0262894	0.0215257	0.0174478	0.00891861	0.0180548	0.00606342	0.0032564	0.013852	0.0173596	0.00554805	0.00753047	0.00424694	0.00584369	0.00855434	0.00573023	0.0198558	0.0108118	0.0149337	0.00394149	0.00950235	0.0117696	0.00703605	0.0312792	0.0144303	0.0255061	0.0231146	0.0128111	0.0411738	0.00536034
490.042@6.1	1.26595	1.63539	1.80597	1.38586	0.950539	1.14202	0.915258	0.663975	1.54096	1.80358	0.604268	1.00114	0.647372	0.705861	1.69782	0.790861	1.14212	0.670514	1.54056	0.306847	1.04985	0.896889	0.89974	1.64874	0.781238	1.69723	3.15257	0.0670762	2.88406	0.953073
494.055@1.9	1.28508	3.27262	2.57135	1.53547	0.826621	0.749504	1.17595	0.817847	2.61394	3.90741	0.618211	2.18874	0.86864	0.831334	1.75902	0.715905	1.39162	0.697455	1.66547	0.391039	0.689946	1.03722	2.22522	5.27497	0.860787	1.22865	5.97768	1.78943	4.43765	1.08619
495.332@3.9	0.447445	0.442087	0.625106	0.418295	0.177396	0.278313	0.341952	0.180893	0.508038	0.589532	0.108983	0.420325	0.372162	0.343818	0.472928	0.312655	0.208976	0.154307	0.471873	0.0770794	0.317824	0.230498	0.472159	0.78153	0.270646	0.325025	0.928144	0.752842	0.552873	0.208213
496.052@1.9	1.12592	2.85654	2.24966	1.34158	0.722357	0.656501	1.02774	0.716747	2.28458	3.40172	0.541387	1.91121	0.76448	0.725159	1.53687	0.626187	1.21806	0.607864	1.44979	0.343332	0.835588	0.906312	1.92839	4.60159	0.749587	1.07013	5.22063	1.56138	3.8783	0.948336
498.18@6.1	0.10085	0.0197819	0.095137	0.0800543	0.0894437	0.148102	0.0665051	0.0442266	0.0639891	0.0397296	0.0760965	0.0526788	0.0559382	0.0996579	0.13781	0.143525	0.0596056	0.0673957	0.156361	0.0204994	0.171662	0.0348386	0.030548	0.0452486	0.0984689	0.297198	0.154202	0.0488248	0.0693518	0.106053
499,2972@0,7	0.0327405	0.0698387	0.0303002	0.0204074	0.0136691	0.024597	0.0211505	0.0208572	0.0421405	0.0436595	0.0111994	0.0277538	0.0173566	0.0196023	0.0413744	0.0197932	0.0156461	0.0088698	0.0274881	0.00338193	0.019984	0.017596	0.0246957	0.0661583	0.0156954	0.0266926	0.0692204	0.040452	0.0536485	0.0222374
499.96@2.4	0.0444236	0.215361	0.100328	0.0899778	0.0328223	0.0311101	0.047219	0.0356702	0.128847	0.241461	0.0152121	0.0532995	0.0241987	0.022749	0.0596454	0.0254256	0.0664896	0.0244279	0.0528963	0.0114296	0.0311904	0.0820458	0.054749	0.183229	0.0219811	0.0346842	0.148524	0.136742	0.239112	0.0273776
502.208@0.7	0.0122658	0.0435764	0.0295343	0.0247614	0.00744277	0.0174223	0.0144393	0.00900303	0.0239822	0.0280163	0.00568666	0.0138476	0.00641711	0.0123537	0.0166418	0.0129594	0.0275285	0.0409749	0.0321048	0.00347582	0.0177669	0.015975	0.028087	0.12715	0.0176382	0.016031	0.0786675	0.0300616	0.0527659	0.0142777
502.37@0.7	0.0955946	0.453614	0.23422	0.160078	0.0804111	0.0720092	0.074208	0.0608033	0.291887	0.4142	0.0367099	0.177119	0.0727303	0.0530601	0.291809	0.0486728	0.143635	0.0600702	0.153134	0.0361505	0.0611481	0.15718	0.333814	0.560592	0.052608	0.0908117	0.455612	0.172417	0.993295	0.0742542
503.03@6.4	0.00330024	0.0181921	0.022022	0.0245484	0.0101326	0.0336295	0.00625279	0.00351361	0.0100713	0.0114568	0.0092302	0.00576158	0.003969	0.00566728	0.00757593	0.0058157	0.0368213	0.0162983	0.0189522	0.00596687	0.00941488	0.0166476	0.00447479	0.015602	0.030676	0.0725722	0.0171045	0.0166326	0.0204993	0.00838262
507.369@4	0.0282068	0.108075	0.0566862	0.0265622	0.0197299	0.0214141	0.0369114	0.0105437	0.0481839	0.0576967	0.00713524	0.0187233	0.0489096	0.0489236	0.0567181	0.0626163	0.0549072	0.0151737	0.160609	0.0068222	0.0394761	0.0589309	0.0213304	0.0697279	0.0341584	0.0346393	0.045372	0.0760052	0.144791	0.0171459
510.06@6.1	0.809568	1.01803	0.883641	0.675211	0.40732	0.246081	0.453955	0.351671	0.902167	1.11162	0.140718	0.630471	0.405031	0.1953	0.989013	0.197683	0.553316	0.29784	0.659445	0.142085	0.208246	0.494248	0.793304	1.26965	0.188476	0.320176	1.63916	0.930283	1.67785	0.375676
514.145@6.1	0.551525	0.165586	0.488747	0.353244	0.445511	0.569017	0.32983	0.246403	0.414436	0.359965	0.284748	0.300736	0.314046	0.422953	0.827965	0.544152	0.298348	0.287295	0.777462	0.106779	0.610985	0.225645	0.332833	0.324105	0.350279	0.984165	0.935831	0.68459	0.537905	0.438095
519.328@3.8	0.0393655	0.144527	0.0382335	0.0332253	0.0147407	0.0378772	0.0310129	0.0170567	0.0693117	0.116844	0.00826018	0.0445232	0.03571	0.0315983	0.0569366	0.028756	0.0285474	0.0120818	0.0348646	0.00700746	0.0332344	0.0334806	0.0720576	0.224307	0.0278825	0.0358176	0.150722	0.0653366	0.174961	0.0371455
520.161@6.1	0.256178	0.189086	0.340081	0.243259	0.154995	0.0825108	0.176457	0.132392	0.305037	0.278343	0.0908942	0.221265	0.146698	0.0833403	0.38446	0.0826803	0.187943	0.12294	0.284604	0.0553254	0.0968787	0.154247	0.238616	0.26026	0.107547	0.150525	0.680785	0.329962	0.489213	0.167636
521.348@3.8	0.272755	0.225351	0.31451	0.223523	0.111555	0.16458	0.195243	0.106514	0.337356	0.350583	0.0658481	0.267864	0.295639	0.18341	0.303081	0.124766	0.132109	0.117328	0.18509	0.0482844	0.169928	0.11634	0.250594	0.36099	0.151017	0.190963	0.439414	0.481922	0.386548	0.181677
521.942@1.7	1.2704	4.35131	2.23802	1.60238	0.622854	0.624627	1.01703	0.793295	2.10933	3.7257	0.352645	1.66727	0.569249	0.48774	1.58883	0.503728	1.30473	0.459103	1.19496	0.28415	0.595417	1.37598	1.92517	5.31826	0.536183	0.900191	4.6802	1.91766	5.36301	0.688857
523.364@3.8	0.399228	0.509	0.462097	0.55117	0.166581	0.327421	0.384134	0.199293	0.457639	0.580912	0.083126	0.472782	0.401936	0.285103	0.481786	0.158377	0.196924	0.169183	0.385159	0.0919342	0.231923	0.179908	0.57657	0.795449	0.23537	0.321549	0.727813	0.674448	0.780076	0.205275
527.77@1.9	0.00410808	0.0563877	0.0180678	0.0156226	0.00485984	0.00711597	0.0124295	0.00482805	0.0168812	0.0257067	0.00516053	0.00984859	0.00208123	0.00648765	0.0137429	0.00629158	0.0124688	0.0117847	0.0266338	0.00152878	0.0179043	0.0221045	0.0108647	0.0743709	0.00372869	0.0213478	0.036863	0.0272905	0.0540427	0.0117385
532.042@6.1	0.395037	0.61705	0.477292	0.362441	0.120163	0.12038	0.237962	0.158488	0.495864	0.645268	0.0711849	0.361362	0.208828	0.109185	0.512191	0.101731	0.293173	0.0960313	0.226687	0.0739002	0.109616	0.260254	0.443558	0.789708	0.088607	0.169252	0.90581	0.476764	0.973601	0.131202
532.118@6.1	0.0590741	0.196025	0.0683624	0.0473082	0.0511093	0.0653926	0.0374009	0.0270708	0.0500715	0.158702	0.0317763	0.0710552	0.0354586	0.0420183	0.0938558	0.0507546	0.0403962	0.0372748	0.102884	0.0143225	0.0668024	0.0265002	0.0410531	0.293413	0.0432197	0.105324	0.121229	0.110404	0.0690728	0.0494855
532.911@5.9	0.00822523	0.0554609	0.0263221	0.0250625	0.0098215	0.0192846	0.00757153	0.00520775	0.0227678	0.0323107	0.00489746	0.0133867	0.00509107	0.00880013	0.00762723	0.00347393	0.0401262	0.0127621	0.027027	0.00683954	0.0108667	0.0230608	0.00661528	0.0407008	0.0197334	0.0345455	0.0284995	0.0372997	0.0601127	0.00693564
547.07@1.1	0.0276541	0.107929	0.0485757	0.0184756	0.0249238	0.0320039	0.0187611	0.0145303	0.063797	0.0391348	0.0238698	0.0218592	0.027462	0.0192054	0.0244043	0.0229911	0.0232352	0.0336061	0.0250956	0.00703852	0.0280461	0.017832	0.0569482	0.185433	0.0313516	0.0579115	0.132363	0.0245238	0.145598	0.0482669
548.275@0.5	0.0192191	0.0358117	0.0141419	0.00849229	0.00588206	0.00637609	0.0139724	0.00572663	0.0203938	0.0257341	0.00506612	0.0162297	0.00837332	0.00770137	0.0161366	0.00647903	0.00832413	0.00421115	0.0102248	0.00255754	0.00943757	0.00745627	0.00685626	0.0267361	0.00800976	0.0160624	0.0339697	0.0184761	0.0330534	0.0102748
550.008@6.1	0.0406731	0.0551306	0.0589931	0.0432676	0.0291861	0.0299138	0.0281365	0.0207472	0.050089	0.0613965	0.0171972	0.0310059	0.0199768	0.0179621	0.0511169	0.0147911	0.0372952	0.0195321	0.0439535	0.00939166	0.018909	0.0283661	0.0287615	0.0616828	0.0205112	0.029305	0.100028	0.040585	0.0989942	0.0268421
551.053@1.9	0.413718	1.01662	0.842371	0.500088	0.266268	0.24599	0.374846	0.256694	0.80031	1.16507	0.204128	0.683588	0.268575	0.270578	0.517849	0.250746	0.474868	0.229301	0.558338	0.127673	0.315661	0.317959	0.685064	1.58033	0.277913	0.389474	1.89612	0.525125	1.28277	0.336964
552.386@0.7	2.08121	6.47325	2.57083	1.6548	1.69292	0.941879	1.04863	1.32177	7.06135	8.65202	0.305147	2.70781	1.01255	0.494591	6.40568	0.255744	2.08414	0.962163	2.42303	0.75293	0.657002	3.57325	8.79986	13.8953	0.304983	0.859065	4.32364	3.42225	12.5249	0.536476
553.05@1.9	0.20214	0.47883	0.397808	0.240632	0.127262	0.114929	0.177993	0.122898	0.396318	0.564304	0.0965536	0.330635	0.131151	0.129373	0.252262	0.120592	0.22758	0.109719	0.264901	0.0609604	0.14914	0.157321	0.33562	0.770164	0.133198	0.18756	0.902528	0.257629	0.650628	0.159758
553.98@6.1	0.0106408	0.0131877	0.0135827	0.0098881	0.00786012	0.0105797	0.00714807	0.0049817	0.0105911	0.00871009	0.00604809	0.00632658	0.00600187	0.0081327	0.014494	0.00842889	0.00859306	0.00607872	0.0144157	0.00210353	0.0106397	0.00614445	0.00574087	0.0150545	0.00749067	0.018362	0.0244909	0.0105599	0.0179475	0.00923582
555.047@1.9	0.0894861	0.212153	0.17687	0.104327	0.0555658	0.0537268	0.0786442	0.0568818	0.180693	0.258983	0.0415715	0.154565	0.0603223	0.0559602	0.111131	0.0531507	0.105211	0.0496882	0.118712	0.0273941	0.0671526	0.070885	0.148698	0.347489	0.0594784	0.0839915	0.400711	0.113901	0.295066	0.0709492
556.282@0.8	0.0205003	0.034053	0.0346926	0.0355553	0.015227	0.0397121	0.0247115	0.0150959	0.0131191	0.0287285	0.00768691	0.0164191	0.0172472	0.00508666	0.0282106	0.0197486	0.0143435	0.0101839	0.0143704	0.00393965	0.0081412	0.0133413	0.0339617	0.0771885	0.0195829	0.0176154	0.0540332	0.0230303	0.0655952	0.0129835
564.14@0.6	0.009327	0.0296091	0.0162117	0.0124348	0.00537719	0.00596995	0.00927113	0.00459821	0.0107435	0.0231919	0.00613562	0.0112318	0.0060142	0.0107383	0.00815059	0.0107975	0.00876424	0.00652917	0.0118864	0.00209708	0.0101224	0.00743726	0.0214579	0.0893745	0.00817016	0.0113182	0.0571255	0.0144149	0.0516803	0.0105235
568.018@6.1	0.346452	0.490031	0.53168	0.401421	0.261413	0.285739	0.259089	0.190194	0.454733	0.543386	0.155497	0.295448	0.180818	0.180021	0.474857	0.12956	0.330953	0.181312	0.414807	0.0860869	0.177565	0.255982	0.263255	0.51728	0.199866	0.258615	0.925599	0.0262517	0.876017	0.256201
569.78@1.9	0.023538	0.147263	0.0442086	0.0912847	0.0258202	0.05483	0.105821	0.0181631	0.0609302	0.0619944	0.0267597	0.0514263	0.00994911	0.0231962	0.0650505	0.024629	0.0604344	0.0601684	0.119855	0.00797485	0.0886344	0.105425	0.025863	0.114997	0.0202569	0.109911	0.124476	0.0501499	0.121781	0.0585433
573.489@0.7	0.0344204	0.0721075	0.0367432	0.0391617	0.0150614	0.00665745	0.0299563	0.0106021	0.0459803	0.0955813	0.00207386	0.0317772	0.0105744	0.00287291	0.0304127	0.00380265	0.0261987	0.00622421	0.0069814	0.0080808	0.00426531	0.0337728	0.0209933	0.0714832	0.00410668	0.0052455	0.0528463	0.0263745	0.0605802	0.00651085
576.512@0.6	0.12548	0.163516	0.154987	0.0763021	0.0531312	0.0123896	0.0695563	0.0498348	0.084993	0.26086	0.0112891	0.0795841	0.0488148	0.0182145	0.185112	0.0145794	0.0305896	0.0227864	0.0635378	0.0136358	0.0116369	0.0429885	0.0505543	0.211159	0.0094225	0.0252917	0.060576	0.128364	0.110724	0.0161145
580.215@6.1	0.103401	0.206455	0.174715	0.130829	0.068826	0.0688844	0.0801961	0.0557233	0.159895	0.222652	0.0407159	0.10577	0.0697045	0.0489464	0.138443	0.053611	0.104753	0.051525	0.110439	0.0258442	0.0685607	0.08942	0.138779	0.421616	0.05195	0.103212	0.336701	0.0133102	0.335989	0.0685296
588.036@6.4	0.0591749	0.207446	0.114683	0.0489046	0.0235292	0.0477052	0.0450118	0.0339453	0.105735	0.176521	0.0309587	0.074293	0.03167	0.0239774	0.0789479	0.0225527	0.0596485	0.0402352	0.127847	0.0159921	0.0385319	0.0443752	0.0984942	0.303464	0.0362848	0.0723254	0.0429064	0.0449084	0.238481	0.0220065
597.533@0.7	0.0209902	0.0749854	0.0313338	0.0259554	0.00973943	0.004069	0.0202793	0.0070353	0.0327357	0.0639103	0.00163366	0.0200985	0.00801231	0.00182309	0.0211201	0.00189781	0.0189514	0.00368085	0.0116287	0.00529004	0.00267669	0.0233996	0.0169727	0.060868	0.00254378	0.00687753	0.0312216	0.03818	0.0404009	0.00418439
5-Amino-6-(5'-phosphoribosylamino)uracil	0.0434335	0.0419984	0.0559572	0.0341511	0.0393924	0.0546688	0.0342301	0.0236512	0.0510338	0.045661	0.024214	0.0306013	0.0170258	0.0365625	0.0565499	0.0559676	0.0328242	0.030238	0.05924	0.00776498	0.0671468	0.0275407	0.00572173	0.0171401	0.0359087	0.0743838	0.0196612	0.116084	0.0626301	0.0491917
5-Hepten-3-ynoic acid, 7-[[(3,4-dihydro-3,4-dihydroxy-1-naphthalenyl)methyl]amino]-2,2-dimethyl-	0.0571453	0.269611	0.0558932	0.0443275	0.0462368	0.0721887	0.0531865	0.0287021	0.138242	0.215656	0.0309566	0.0840363	0.0369484	0.0474284	0.0783868	0.0670895	0.0362943	0.029934	0.0950117	0.009982	0.0745515	0.0819175	0.129752	0.423313	0.0436118	0.127467	0.11799	0.13153	0.307993	0.0430392
5'-Methylthioadenosine	0.479058	0.162546	0.831777	0.366687	0.491674	0.555861	0.353461	0.232758	0.242885	0.739311	0.420898	0.37218	0.570837	0.33765	0.549308	0.389349	0.41466	0.544519	0.447293	0.115617	0.458124	0.323764	0.234136	0.129634	0.178166	1.11317	0.473627	0.489022	0.157548	0.949143
600.327@1.8	0.160741	0.10491	0.0973155	0.0793122	0.0213907	0.0350183	0.0449985	0.0349349	0.126637	0.0774083	0.0123824	0.0590338	0.0507237	0.0339267	0.100029	0.0224784	0.0295271	0.0123421	0.0600443	0.00746448	0.027221	0.0321976	0.0265078	0.0774991	0.0173848	0.0217982	0.089906	0.0912999	0.0684138	0.0273351
600.508@0.7	0.0323948	0.0781985	0.0165914	0.0356549	0.0136705	0.00580943	0.0268627	0.00913218	0.0427011	0.0850308	0.00157176	0.0262553	0.0155999	0.00306498	0.0270051	0.00387877	0.022689	0.00632132	0.00668951	0.00780815	0.00407193	0.0334961	0.0237812	0.0538555	0.00395578	0.00505889	0.022664	0.0260436	0.0509112	0.00604805
602.059@1.9	0.28	0.710154	0.559045	0.318399	0.175016	0.165997	0.243394	0.171877	0.544717	0.830995	0.130978	0.455721	0.178123	0.171243	0.35444	0.158113	0.304618	0.150986	0.349697	0.0821046	0.204989	0.220119	0.469775	1.12019	0.179757	0.248144	1.23021	0.365141	0.912769	0.22059
602.197@6.1	0.360506	0.205725	0.373149	0.269434	0.239568	0.237211	0.215472	0.161857	0.323597	0.290063	0.136826	0.236442	0.203826	0.205315	0.530281	0.108607	0.240467	0.193014	0.458247	0.0729271	0.126807	0.179779	0.366739	0.353864	0.179415	0.237613	0.715443	0.446383	0.471634	0.249092
604.056@1.9	0.226115	0.575728	0.449882	0.259839	0.140571	0.134978	0.19642	0.137936	0.43985	0.679788	0.1057	0.364692	0.14484	0.138829	0.286569	0.127729	0.245477	0.123833	0.28033	0.066042	0.166393	0.179893	0.383366	0.895318	0.14766	0.200232	0.98776	0.297038	0.736974	0.178705
609.443@0.7	0.1897	0.491592	0.205496	0.13067	0.152777	0.0787878	0.084441	0.121027	0.705588	0.805139	0.0222944	0.271404	0.0806493	0.040036	0.647091	0.0530725	0.179988	0.0866423	0.228198	0.0720302	0.0549823	0.3352	0.872471	1.28699	0.0207025	0.0623291	0.274883	0.299299	1.201	0.0341068
613.768@1.9	0.0284349	0.0693543	0.0478211	0.0947277	0.0306178	0.0665381	0.133923	0.00449151	0.0264719	0.0676784	0.0304926	0.0567936	0.012997	0.0256162	0.0440422	0.0308356	0.084709	0.0516506	0.169287	0.00936952	0.104042	0.117695	0.0308456	0.0935602	0.0203481	0.129712	0.301344	0.0496767	0.0407755	0.0633424
620.295@1.6	0.0233268	0.0178314	0.0231873	0.0221649	0.00837662	0.0104613	0.00985492	0.00914012	0.0240341	0.0168192	0.00381198	0.0094643	0.00901325	0.00998732	0.014872	0.0089463	0.0185551	0.00738499	0.0221856	0.00253655	0.0123499	0.0123337	0.00969192	0.0259491	0.00942394	0.00801605	0.0243577	0.0392141	0.0205751	0.00723812
629.063@6.1	0.00595653	0.0233184	0.0180946	0.0113529	0.00612911	0.0109695	0.00384233	0.00258734	0.00945778	0.01244	0.00367835	0.00555933	0.00270769	0.00329011	0.0100301	0.00262423	0.0123323	0.00798718	0.0252972	0.00302577	0.00843005	0.0121028	0.00981029	0.0343181	0.00984702	0.0168359	0.0156123	0.0102237	0.0324299	0.0058606
630.795@1.9	1.07809	0.628989	2.11563	1.78379	1.04499	1.919	4.02694	0.124122	0.940617	3.05989	0.807578	2.09338	0.4779	0.556543	0.113284	1.24599	2.1892	0.561726	1.12877	0.283079	3.09288	1.20447	1.61944	6.43127	0.64398	0.998451	10.0977	1.8497	1.42513	0.659686
635.751@1.8	0.0215594	0.165685	0.0321783	0.0654614	0.0265878	0.0439225	0.0844545	0.0259594	0.024635	0.0449291	0.021271	0.0378837	0.0107528	0.0295954	0.0636288	0.0271449	0.0512852	0.0542821	0.115538	0.00534087	0.0797977	0.113263	0.0391279	0.123868	0.0177055	0.137084	0.186632	0.0463917	0.186798	0.0673049
641.148@8.2	0.0784585	0.160366	0.288051	0.31618	0.0233867	0.0358435	0.287188	0.0203637	0.065765	0.151194	0.0929464	0.0682008	0.0445184	0.0266869	0.261743	0.138873	0.0162985	0.0318997	0.259395	0.00265618	0.0606789	0.00691344	0.00115773	0.0117866	0.0726984	0.264484	0.00613102	0.44373	0.0475847	0.0737773
644.811@1.8	0.017922	0.162456	0.0243412	0.0498314	0.0160421	0.0313952	0.061616	0.0212557	0.0667819	0.106312	0.0147445	0.025815	0.00699054	0.0199235	0.0518412	0.0204704	0.0345374	0.0364523	0.0853949	0.00369075	0.0600421	0.0904633	0.0254568	0.0947859	0.0159712	0.0907606	0.12779	0.0367945	0.159026	0.0434391
645.605@0.7	0.0616357	0.352341	0.0733183	0.0657272	0.0342757	0.0245352	0.0426141	0.0263512	0.110115	0.339436	0.0145912	0.0689799	0.0424746	0.0208588	0.0815294	0.028253	0.0431349	0.0230435	0.0331735	0.0125852	0.0292878	0.0650235	0.170887	0.605367	0.0191373	0.029767	0.146818	0.125584	0.249533	0.0180101
645.995@6.1	0.0905899	0.131572	0.13177	0.106504	0.0647425	0.0467918	0.0654962	0.0477831	0.119557	0.14026	0.0365967	0.0749451	0.0436814	0.0432187	0.118917	0.0315829	0.0858298	0.0447863	0.100455	0.0219194	0.0413172	0.0673257	0.0680852	0.141414	0.0477847	0.0633888	0.236084	0.00619636	0.212157	0.0624771
649.746@1.9	0.0176052	0.045236	0.0306508	0.0608345	0.019357	0.0445435	0.0815581	0.0137381	0.0158416	0.0397583	0.0187735	0.0367702	0.00702336	0.0143749	0.0337594	0.0206886	0.0514394	0.0332552	0.108188	0.00578492	0.0667398	0.0717519	0.017987	0.0570823	0.0139523	0.0821046	0.184545	0.0322342	0.0207139	0.0399776
663.108@6.7	0.00673568	0.0159941	0.0100541	0.00600702	0.00510507	0.00690046	0.00396979	0.0018109	0.0104932	0.00955308	0.00607972	0.00545736	0.00337208	0.00274544	0.00695286	0.00270597	0.0045706	0.0113483	0.00457736	0.00136934	0.0045544	0.00395495	0.00690382	0.0272721	0.00740948	0.0102743	0.0365418	0.00488993	0.0276553	0.00899009
663.109@6.6	0.0369609	0.26568	0.175777	0.0859023	0.09249	0.11414	0.0276819	0.0351201	0.136097	0.0863176	0.0912933	0.0935212	0.0245671	0.0464302	0.0416417	0.0395006	0.0794554	0.165498	0.0751954	0.0224011	0.0689219	0.0794886	0.0384511	0.40088	0.112531	0.164331	0.140141	0.0884939	0.0655076	0.140009
671.727@1.8	0.00696681	0.0491675	0.011614	0.0205977	0.00513966	0.00900003	0.0183827	0.00439477	0.0166552	0.0136553	0.00714828	0.0149896	0.00234542	0.00714969	0.0139644	0.00770576	0.0106529	0.0141889	0.025297	0.00236305	0.0219303	0.0344656	0.0157032	0.0871099	0.00818412	0.0344049	0.0692546	0.0209269	0.0599298	0.015542
671.822@1.9	0.0309544	0.212003	0.0464197	0.0827473	0.0319675	0.0540304	0.108302	0.033165	0.10267	0.0601828	0.0180847	0.0630876	0.0147657	0.0226131	0.0762693	0.0223592	0.0629733	0.0628118	0.0875269	0.00837185	0.0687966	0.118509	0.0466343	0.147345	0.0167063	0.145354	0.264998	0.0601439	0.228375	0.0487215
674.536@3.6	0.517502	0.639557	0.293552	0.639053	0.204905	0.217112	0.178019	0.191664	0.473304	0.359793	0.0511532	0.429986	0.201396	0.130176	0.423216	0.11793	0.500727	0.276704	0.450943	0.0505287	0.11552	0.305336	0.311606	0.608487	0.0755344	0.209893	0.465618	0.407126	0.451343	0.16096
676.764@1.8	0.00689407	0.0333381	0.00572593	0.011356	0.00399574	0.00798153	0.0150298	0.00362712	0.0139386	0.0113851	0.00543878	0.00797063	0.00127335	0.00441386	0.0132193	0.0040557	0.0166444	0.00946995	0.0225545	0.00148633	0.0150944	0.0320268	0.00729864	0.028315	0.00331208	0.0181977	0.0423401	0.0145251	0.0332304	0.00976432
69.058@5.4	0.05694	0.21554	0.0989372	0.0789778	0.0567994	0.0664732	0.0398081	0.0249834	0.0694034	0.0824469	0.0348273	0.0485774	0.0392737	0.0475396	0.122345	0.0660322	0.0726859	0.0621461	0.0951041	0.0200988	0.0847479	0.0425107	0.0940546	0.346962	0.0790248	0.146572	0.151444	0.0947243	0.137222	0.0476464
691.552@2.9	0.123711	0.100075	0.0746988	0.164854	0.0655482	0.0221954	0.0636589	0.060834	0.22112	0.206212	0.0183001	0.172765	0.0580148	0.0285977	0.149732	0.0191093	0.108797	0.0213613	0.213417	0.034034	0.0118447	0.173683	0.0748083	0.191929	0.0269485	0.018108	0.27107	0.158827	0.299393	0.0382337
694.126@6.3	0.0234774	0.0889904	0.04355	0.0381695	0.0233444	0.027981	0.0146153	0.0128519	0.0492104	0.0606784	0.0244374	0.0204568	0.0094942	0.0194228	0.0390105	0.0230394	0.0424752	0.0443498	0.0222363	0.00576444	0.0381039	0.0333061	0.0211456	0.105779	0.0138309	0.074987	0.083498	0.03204	0.133382	0.0170446
699.519@1.5	0.0318855	0.34089	0.0451479	0.0366994	0.0143817	0.00826251	0.0158043	0.0147221	0.0714447	0.181574	0.00585105	0.0776438	0.00996647	0.0093123	0.0440035	0.00532229	0.0367354	0.00945741	0.0181997	0.00672474	0.0105682	0.0537985	0.0308972	0.128848	0.00598694	0.0167837	0.0922209	0.0779246	0.234232	0.0176745
6alpha-Hydroxy-3-oxo-5beta-cholan-24-oic Acid	0.160174	1.66141	2.12414	1.16349	0.782314	0.144009	1.02816	0.0669061	0.0432428	1.95221	0.396543	1.20782	0.0335113	0.804095	0.164791	0.628749	1.10983	0.668816	2.07059	0.356202	0.887146	0.637174	0.747823	1.76409	0.683522	1.27223	2.86282	0.0632037	1.33452	0.8323
6-Thioxanthine	0.0147975	0.0344924	0.0263012	0.0130436	0.00853991	0.00763235	0.0101181	0.00718404	0.0186224	0.0367633	0.00632302	0.0191507	0.011488	0.0103632	0.0250638	0.0109334	0.00704876	0.00671044	0.0152733	0.00183556	0.0144561	0.00627343	0.0113753	0.0346863	0.00900525	0.0167837	0.0516157	0.0265062	0.0372224	0.0134297
700.552@3.5	1.61428	2.458	1.51995	2.30783	0.826627	0.64351	1.07451	0.657321	1.79382	2.21472	0.145252	1.25463	0.762518	0.345734	1.94656	0.244384	1.74938	0.888538	1.56271	0.134037	0.341856	1.45099	1.36121	2.68056	0.217326	0.681848	1.93763	1.89474	1.53097	0.551526
702.537@1.5	0.0133232	0.0745486	0.0200815	0.010599	0.00551366	0.00224739	0.00444848	0.00625914	0.0271637	0.0438502	0.00260616	0.0160581	0.00387292	0.00347343	0.0147809	0.00109561	0.0152917	0.00461333	0.00653661	0.00261744	0.00314372	0.0261653	0.0160385	0.0527278	0.00216005	0.00582185	0.0340223	0.0273893	0.0620893	0.00334432
702.569@3.5	21.5392	32.5325	17.1765	30.6879	11.513	4.7201	13.9256	6.21788	23.883	30.0279	1.33167	12.6262	5.77009	3.95631	30.2506	1.98657	19.2167	4.62258	9.45011	1.45881	3.38597	21.5299	17.8097	28.5975	1.61333	6.00744	17.444	27.2842	14.1477	3.47739
706.068@1.9	7.09485	17.4002	13.9022	7.94885	4.26463	3.95512	5.9032	4.11432	12.847	18.8905	3.03716	10.5161	4.10019	4.06415	8.20952	4.02669	7.59819	3.73627	8.93489	2.02582	5.0361	5.02098	11.0305	25.8009	4.24393	5.94459	28.6069	8.3579	20.2968	5.12629
71.074@4.9	0.228133	0.241611	0.355753	0.290164	0.187444	0.336773	0.192951	0.116652	0.274511	0.337654	0.139256	0.179513	0.211244	0.221424	0.454429	0.229008	0.264928	0.185793	0.415306	0.0853535	0.319287	0.176585	0.434863	0.313132	0.301108	0.558291	0.535414	0.389752	1.05934	0.225709
714.056@1.9	2.8672	10.7212	5.60329	3.21308	1.72758	1.59729	2.3726	1.67001	5.1747	7.59506	1.22504	4.24534	1.65226	1.6379	3.3387	1.62256	3.05857	1.48789	3.59514	0.816808	2.03294	3.52352	4.40052	10.4174	1.71142	2.39593	11.507	5.78191	13.3107	2.06284
714.296@6.1	0.78551	1.67288	0.377199	0.259972	1.11616	3.40541	0.389729	0.297164	0.238865	0.106365	1.26647	0.185847	0.489572	1.97075	1.33226	3.95188	0.25466	0.713979	2.58916	0.135277	4.55961	0.130687	0.169766	2.59003	1.64723	8.76795	0.657309	1.26515	0.179425	1.28476
715.516@1.5	0.637386	1.22262	0.585092	0.494768	0.188856	0.0957435	0.158595	0.173759	1.0332	1.2841	0.0653287	0.463622	0.173108	0.0684493	0.688659	0.0311407	0.242322	0.128586	0.137675	0.0638169	0.0679075	0.487201	0.516356	1.47693	0.032948	0.102899	1.49714	0.820701	1.17226	0.106089
716.582@3.5	0.213166	0.561848	0.141113	0.29531	0.122125	0.0685116	0.130081	0.109196	0.483591	0.442479	0.0135891	0.206366	0.144947	0.0313883	0.481032	0.0286746	0.155365	0.0761074	0.139268	0.0240898	0.0329592	0.232627	0.218574	0.507233	0.0158968	0.0497231	0.232004	0.266848	0.505005	0.0520679
717.567@2.9	1.22279	1.61313	1.40681	0.933053	0.643303	0.198103	0.547832	0.452666	2.05426	2.26402	0.172504	1.81612	0.410611	0.200136	1.67751	0.176196	0.8386	0.225068	3.03019	0.31558	0.15558	0.881769	1.35008	3.65489	0.115163	0.273158	2.4914	1.97434	2.01392	0.359247
718.532@1.6	0.0328335	0.0860953	0.0373071	0.0205401	0.00992304	0.00536728	0.00725432	0.00988081	0.0481182	0.0725153	0.00489762	0.0174746	0.00915634	0.00585527	0.0331722	0.00460477	0.0164621	0.00997401	0.00981558	0.0034741	0.00550418	0.0302869	0.0494789	0.178923	0.00449679	0.00848146	0.0681727	0.0501223	0.140519	0.00636436
718.535@1.5	0.15581	0.311087	0.1499	0.0922153	0.0490105	0.021413	0.0553066	0.0486088	0.233955	0.306095	0.0166587	0.0903564	0.0446058	0.0180494	0.170091	0.025539	0.0642196	0.0396283	0.0342894	0.014288	0.0193817	0.136916	0.21769	0.756638	0.00986726	0.0280402	0.327195	0.20348	0.584291	0.0253996
719.589@2.9	1.15735	1.26003	1.15639	1.37189	0.496533	0.218257	0.533853	0.504997	1.93145	3.80299	0.176245	1.70059	0.550043	0.174243	1.47023	0.126326	1.48055	0.352274	2.23063	0.261878	0.133755	2.40651	1.42907	3.8278	0.114332	0.259188	2.70569	1.8193	1.92842	0.360398
720.588@2.9	0.25067	0.302802	0.313707	0.362056	0.127861	0.0931318	0.119869	0.122318	0.534658	1.07144	0.0502809	0.336338	0.143654	0.0439629	0.377637	0.0325954	0.391811	0.0948905	0.574921	0.065242	0.0318717	0.657571	0.388592	1.04789	0.0765856	0.0575498	0.744431	0.453667	0.892994	0.0996469
721.503@1.4	0.386208	1.82474	0.559796	0.337643	0.166072	0.0934305	0.230524	0.190934	0.600413	1.65886	0.0488563	0.371812	0.0964609	0.0750274	0.538731	0.0535973	0.305438	0.0634512	0.232151	0.0636649	0.0671886	0.76506	0.684936	1.55001	0.0582596	0.156068	0.686299	0.902175	1.80745	0.0747192
723.519@1.4	0.55796	2.60567	0.808847	0.48635	0.236098	0.133864	0.327172	0.270191	0.843616	2.39094	0.0673519	0.528778	0.131596	0.0973195	0.767099	0.0656796	0.43279	0.090613	0.325235	0.0926363	0.0921443	1.1224	0.939325	1.96781	0.0852661	0.218555	0.773962	1.07889	2.65537	0.106485
723.521@1.4	4.30926	16.1583	4.87285	3.07621	1.83714	0.986765	2.0062	1.90209	6.91403	14.8847	0.365193	3.87704	1.09004	0.627949	6.54451	0.460644	3.24199	0.573383	2.75206	0.621679	0.566119	9.18625	11.4892	21.8022	0.465508	1.16018	5.31073	8.92491	11.3729	0.679464
724.522@1.4	0.228089	1.20839	0.325559	0.207218	0.0958093	0.0563281	0.117373	0.112032	0.430246	0.968756	0.0283121	0.248976	0.0560208	0.0411871	0.31477	0.0273349	0.182111	0.0388103	0.131924	0.0389614	0.0471536	0.450497	0.374641	0.810096	0.0365664	0.0907376	0.344845	0.523511	1.1594	0.0503892
724.524@1.4	1.20476	5.10227	1.49426	1.00029	0.472718	0.230814	0.622263	0.538495	1.94695	4.56574	0.118241	1.30316	0.352158	0.192687	1.81174	0.113403	0.805406	0.177015	0.726051	0.182294	0.155438	0.91184	2.99651	5.55335	0.139556	0.352602	1.74859	2.6013	4.89127	0.218381
724.987@0.7	0.00978791	0.0846212	0.016882	0.0101592	0.00472932	0.0089834	0.0059887	0.00718445	0.0232569	0.0370015	0.00505479	0.00596829	0.00365351	0.00797861	0.0150064	0.00997792	0.00774095	0.00450279	0.00514298	0.00124297	0.00865242	0.0176897	0.00775036	0.0443042	0.0071803	0.00279302	0.0233527	0.0299116	0.126906	0.00464216
725.553@3.5	0.588599	0.953282	0.670401	0.896895	0.330633	0.217362	0.427466	0.308814	0.8305	1.06196	0.0647617	0.463932	0.329181	0.125637	0.917217	0.0746068	0.599519	0.203803	0.477585	0.0613144	0.125569	0.613291	0.672457	1.06151	0.0596907	0.208681	0.717827	0.838299	0.619069	0.136843
727.514@2.8	0.537898	0.392328	0.35973	0.249918	0.192185	0.149351	0.134737	0.212005	0.771655	0.394124	0.0357082	0.340964	0.253962	0.0797422	0.387794	0.056329	0.16079	0.118132	0.182562	0.0828054	0.0656936	0.195832	0.30798	1.12608	0.0783775	0.080258	0.975834	0.350579	0.879899	0.108973
727.548@1.5	0.016737	0.283551	0.0469333	0.0398852	0.0112661	0.00817374	0.0224308	0.0147611	0.0651049	0.144083	0.00374359	0.0507503	0.00948639	0.0075518	0.036285	0.00391817	0.0278838	0.00724456	0.0175841	0.00439105	0.00812276	0.0433078	0.0242266	0.097205	0.00563107	0.0101406	0.0590783	0.0790511	0.174058	0.0136812
727.551@1.4	0.123359	1.15439	0.204645	0.188088	0.0655515	0.0320282	0.0868423	0.0707557	0.307636	0.384156	0.0291849	0.253903	0.0439631	0.0363057	0.214006	0.0387503	0.114416	0.0415217	0.107992	0.0276415	0.0396213	0.209866	0.193206	0.557245	0.0233869	0.0394024	0.28307	0.21478	0.789416	0.0556852
728.583@3.5	0.660094	1.19614	0.35799	0.414721	0.190214	0.153197	0.262547	0.339664	1.52667	1.01193	0.0462254	0.539777	0.283626	0.116126	0.456938	0.08222	0.260552	0.14386	0.288091	0.0725709	0.132148	0.606938	0.592432	1.6151	0.0396097	0.1186	1.2188	0.70035	1.31408	0.17601
730.598@3.5	0.524308	2.96272	0.26374	0.459233	0.219862	0.11646	0.207653	0.278447	1.34606	1.1159	0.0373158	0.396789	0.221506	0.055805	0.896438	0.0675751	0.196161	0.0989621	0.466549	0.0594726	0.051356	0.512367	0.698032	1.32348	0.0298402	0.0917174	0.740052	0.575232	0.765489	0.122715
731.548@2.8	11.054	13.1243	12.1325	7.57582	5.61811	2.3363	3.82782	4.55561	19.2604	22.0799	0.532799	9.34678	4.33749	1.45523	10.8315	0.778953	7.54987	2.42826	6.45779	2.13098	1.3274	13.7449	19.918	44.8189	0.651228	2.06154	18.9792	12.6306	16.8041	1.23863
734.567@2.9	1.62942	2.39681	2.23818	1.82303	1.01045	0.364489	0.73544	0.779006	3.53849	5.11959	0.0552126	1.37767	0.629717	0.264649	1.97524	0.107982	1.63318	0.38848	1.3089	0.392309	0.23456	3.38615	4.86344	11.7026	0.124974	0.373054	2.12913	2.62576	4.04302	0.114104
737.533@1.4	0.0442499	0.216172	0.052805	0.0407447	0.0175921	0.00998147	0.0158088	0.0214141	0.0895051	0.168733	0.00534161	0.0413164	0.0128213	0.0061858	0.0676242	0.00618721	0.0235255	0.00946348	0.018668	0.0063488	0.00787891	0.0738448	0.0580815	0.182427	0.0056795	0.0104737	0.0798258	0.076282	0.197716	0.00875671
737.535@1.4	0.897106	3.9499	1.75079	2.16976	0.481879	0.283639	0.605165	0.551682	1.98146	4.26802	0.200114	1.04956	0.579527	0.134557	2.1042	0.115199	0.790572	0.265292	0.468601	0.1889	0.13836	1.64002	3.0172	7.09884	0.280609	0.262802	3.73117	1.57189	3.71555	0.376413
738.543@3.5	0.0332569	0.0640277	0.0535207	0.0517595	0.0204662	0.019413	0.0280498	0.0190261	0.0448532	0.0673241	0.00859384	0.0345815	0.0171256	0.0152413	0.0397442	0.0121675	0.0443338	0.0205116	0.0418074	0.00495307	0.0178874	0.0294159	0.0271145	0.0670536	0.0121362	0.023554	0.0649323	0.0416037	0.0391547	0.0153571
739.554@2.7	0.383861	2.47797	0.597619	0.383261	0.173019	0.134433	0.289385	0.21323	1.12638	1.02608	0.0831602	1.04278	0.191059	0.0806963	0.626208	0.114412	0.37281	0.134354	0.493968	0.0957041	0.077145	0.475559	0.636052	1.86283	0.065039	0.152564	0.867041	0.813867	1.46828	0.174169
741.53@1.5	1.36876	3.43297	1.2009	1.69686	0.507875	0.347847	0.603378	0.50102	3.6153	4.44258	0.15608	1.26221	0.67688	0.257992	1.80024	0.152443	0.868429	0.439343	0.380439	0.174943	0.246935	1.63429	2.94475	7.69851	0.175227	0.311725	3.52547	2.79785	5.05511	0.306044
745.6@2.8	2.87086	5.79022	4.04969	3.03718	1.47428	0.518764	2.19416	1.434	5.01049	7.70983	0.451835	4.09418	1.62243	0.571074	5.68244	0.574085	5.05397	0.778102	4.2562	0.698062	0.454939	5.30335	3.87375	9.69238	0.346171	0.834633	3.69977	5.99933	5.31842	0.324869
746.604@2.8	1.23245	2.41194	1.74847	1.32954	0.640513	0.222124	0.91478	0.641601	2.03212	3.78961	0.193163	1.71802	0.707561	0.24078	2.52526	0.252169	2.07033	0.332226	1.71932	0.297242	0.198773	2.22333	1.78821	4.72634	0.1525	0.354097	1.52329	2.6025	2.4053	0.134474
748.159@6.1	0.513612	0.290559	0.495886	0.363674	0.259231	0.134871	0.265447	0.205374	0.46011	0.447317	0.143439	0.327871	0.251343	0.114276	0.623604	0.120594	0.312728	0.18808	0.402613	0.0838052	0.126773	0.248522	0.396017	0.39262	0.172634	0.201071	0.893497	0.507165	0.643156	0.253281
748.572@3.5	0.0121994	0.0293438	0.014485	0.021102	0.00753982	0.00580851	0.00890747	0.00626914	0.0171063	0.0243008	0.00153191	0.0102544	0.00575355	0.00305421	0.0147344	0.00218303	0.0159496	0.00606623	0.0099468	0.00133718	0.00339196	0.0131262	0.00874985	0.0247651	0.00181034	0.00532738	0.0170808	0.0181185	0.0146332	0.00358684
749.536@1.4	2.4464	13.5666	3.20065	2.64704	1.30385	0.824933	1.18974	1.28881	5.03315	6.36486	0.449082	2.39787	0.902917	0.541275	4.56154	0.660728	1.9723	0.518758	1.89793	0.409759	0.630029	6.35308	7.36892	11.0834	0.404534	0.824152	3.46343	6.02375	8.34411	0.519999
752.243@6.1	0.344352	0.0439938	0.234795	0.168317	0.33343	0.481618	0.19204	0.15035	0.173684	0.0954369	0.238728	0.131509	0.198104	0.358787	0.536468	0.50201	0.152632	0.202304	0.568293	0.0632767	0.533927	0.0891124	0.135596	0.901941	0.276247	0.822491	0.426122	0.420249	0.166752	0.339115
752.553@1.4	0.111854	0.958123	0.221116	0.19511	0.0710218	0.0554095	0.0826217	0.0761035	0.274468	0.691996	0.0267068	0.143021	0.0478942	0.0358899	0.241346	0.0390811	0.11709	0.036642	0.0919748	0.0241185	0.0495222	0.27405	0.231364	1.0946	0.032589	0.0616196	0.206588	0.36551	1.04528	0.0330888
752.555@1.4	0.598012	4.08709	0.983978	0.997431	0.389646	0.249454	0.344771	0.37142	1.564	3.38141	0.101008	0.714288	0.281371	0.175134	1.3921	0.172296	0.507733	0.171081	0.477429	0.115135	0.195944	1.67148	2.04435	7.84152	0.125285	0.23304	1.0614	1.79407	2.57493	0.136007
753.533@2.8	2.01988	1.95065	1.57193	0.999947	0.75502	0.632104	0.569792	0.764251	2.38324	2.49492	0.143739	1.4009	0.728849	0.259739	1.57671	0.199494	0.979011	0.374878	0.790399	0.28326	0.299209	0.976144	1.59631	4.53989	0.115191	0.390553	2.76588	1.65462	3.44466	0.35358
753.711@6.1	0.0353566	0.1297	0.0195152	0.0446291	0.0284173	0.0314992	0.0174277	0.013329	0.0695856	0.0986871	0.0185674	0.0418531	0.0201539	0.0280468	0.0506246	0.0315461	0.0144464	0.0167426	0.0461559	0.00613379	0.0305997	0.0396661	0.0654514	0.206626	0.0217231	0.0249835	0.0418264	0.066388	0.152086	0.0282736
755.546@2.8	2.0453	1.94887	1.57982	1.01584	0.764267	0.632251	0.571812	0.770559	2.41433	2.49632	0.143028	1.41013	0.734631	0.258345	1.59719	0.200402	0.979596	0.374732	0.790959	0.286202	0.298436	1.13571	1.68116	3.00279	0.112051	0.388256	2.76263	1.67016	1.5994	0.349361
758.257@6.1	0.00785637	0.022902	0.0120004	0.00415954	0.00779135	0.0175926	0.00439631	0.00332967	0.0106133	0.0114336	0.00816924	0.00516869	0.00413528	0.0113229	0.0164987	0.0184734	0.00430247	0.00631144	0.0158923	0.00152448	0.0211061	0.00817313	0.00774798	0.0320757	0.0109314	0.0366802	0.0106144	0.0229357	0.0387069	0.010707
758.259@6.1	0.101294	0.241712	0.0946619	0.0685583	0.0781639	0.0943893	0.0640445	0.0483171	0.0759688	0.0452154	0.0564941	0.0637744	0.0626928	0.0850305	0.170804	0.0909739	0.0539593	0.0610857	0.150459	0.0214221	0.102049	0.0371906	0.0605298	0.369517	0.0635087	0.152489	0.193061	0.157347	0.0923715	0.0928313
758.63@3.5	0.05774	0.445028	0.040599	0.0896268	0.0301941	0.0219404	0.0330087	0.0286339	0.341154	0.169469	0.00795012	0.0729901	0.0162854	0.017295	0.167838	0.0122049	0.0372323	0.021227	0.0876854	0.0138615	0.0158702	0.139403	0.255101	0.490003	0.00671587	0.0318453	0.219827	0.0723414	0.259851	0.0178551
759.521@1.4	0.656471	2.21493	0.947579	1.13632	0.423085	0.264943	0.426174	0.317411	2.24935	2.49416	0.0742565	0.78979	0.313584	0.214062	1.16784	0.123499	0.713776	0.289014	0.409879	0.156519	0.263853	1.05249	2.26404	8.03149	0.0865586	0.377097	2.05334	1.15995	3.81252	0.126519
759.579@2.8	84.9727	105.017	74.2435	50.9068	28.3811	12.0968	26.6036	27.3314	93.9039	116.435	4.64358	47.9872	24.9985	7.19566	72.0628	4.68522	32.5578	17.5035	21.3495	8.96957	6.08767	39.8594	85.8305	162.44	3.84802	12.1457	96.2436	88.4489	85.7038	8.7939
760.118@6.9	0.0101792	0.0597906	0.0327178	0.095116	0.00578459	0.00484252	0.0900851	0.00301207	0.025659	0.0185615	0.0132691	0.00912538	0.00924399	0.00302278	0.0223896	0.0064645	0.00591636	0.0183367	0.0420255	0.001809	0.0198941	0.00385466	0.0040355	0.0436927	0.00739821	0.043753	0.018099	0.0552774	0.0241149	0.0125484
760.582@2.8	25.2325	29.6058	13.8067	9.98921	7.6143	3.01678	5.77729	7.20347	29.2801	24.5977	1.73819	12.9735	6.88692	2.06883	10.9238	1.03627	7.93932	5.55838	5.34423	1.98486	1.52767	8.53298	23.8374	41.7589	0.942821	2.97483	28.57	13.9803	25.1816	2.44829
762.588@3.5	0.165946	0.360821	0.208186	0.286378	0.103925	0.0807348	0.132467	0.0829374	0.231116	0.326483	0.0202891	0.122852	0.0784407	0.0426532	0.219243	0.027307	0.195203	0.0778467	0.143716	0.0188288	0.0444456	0.195724	0.125435	0.279733	0.0251245	0.0758798	0.236654	0.262029	0.196998	0.043822
764.125@6.1	0.146091	0.107989	0.168224	0.11644	0.0777564	0.0396832	0.0857133	0.0652008	0.162375	0.164634	0.0207244	0.109258	0.0714995	0.0317013	0.18003	0.032278	0.100027	0.0518344	0.0796716	0.0265809	0.0377248	0.0852125	0.136966	0.16524	0.0296212	0.0519484	0.291175	0.151328	0.254484	0.0371743
765.532@1.4	3.08934	10.6314	4.48131	9.07334	1.36631	1.02608	1.74123	1.05232	6.85991	10.2408	0.28833	3.33753	1.88724	0.364317	3.01702	0.591108	1.43126	0.698315	1.1135	0.436211	0.425952	2.60036	9.79813	28.0691	0.786632	1.3051	6.33249	4.21522	16.1689	0.495819
765.569@3.5	0.0219425	0.0456434	0.0291101	0.033429	0.0126568	0.00994703	0.0157697	0.00972557	0.030269	0.0441281	0.00314286	0.0172464	0.0091345	0.00601835	0.0287505	0.00440269	0.0253012	0.00952276	0.0188297	0.00398884	0.00611403	0.0217263	0.0255653	0.0668287	0.00377461	0.0103462	0.0377777	0.0331303	0.0454483	0.00680481
766.556@0.6	0.260548	0.310271	0.272602	0.12411	0.0984657	0.025373	0.112801	0.0838843	0.176461	0.463238	0.0163235	0.118773	0.0548382	0.0238919	0.334054	0.0218225	0.0615695	0.034926	0.0860184	0.0244096	0.0320634	0.0836262	0.162842	0.335871	0.0287831	0.0310129	0.113097	0.216783	0.354688	0.0180562
767.52@2.9	0.0245365	0.0453262	0.0650513	0.0300494	0.0182907	0.0127006	0.0168356	0.0153512	0.0509059	0.07078	0.00668674	0.0370483	0.0131427	0.0140443	0.0238944	0.0106018	0.0352422	0.0143655	0.0428618	0.0094885	0.017339	0.0310734	0.0622686	0.142171	0.0121291	0.0191968	0.120192	0.0281426	0.0701243	0.0114623
767.583@2.7	6.23533	11.9838	7.77032	11.2513	3.69727	1.9023	7.54598	2.87291	8.70693	12.7126	0.42222	8.10222	4.18149	1.33036	6.14486	2.65532	7.08063	1.89927	18.1443	1.1155	1.24322	5.11658	5.92678	15.2252	1.06049	2.90446	5.31809	13.5875	7.35422	0.775062
768.548@1.4	0.145324	1.09035	0.302	0.287538	0.0808959	0.0463614	0.140936	0.0744362	0.469297	0.738247	0.0255415	0.222635	0.103589	0.025427	0.242029	0.0543013	0.100245	0.0419879	0.0714055	0.0337347	0.0361962	0.262784	0.450956	1.85598	0.0424588	0.0619559	0.429968	0.552554	1.22847	0.0377026
768.55@1.4	0.719815	4.1036	1.25196	3.04688	0.380807	0.180704	0.569538	0.32144	2.1873	2.97999	0.0889431	1.02751	0.562724	0.108123	1.18867	0.211124	0.409942	0.171374	0.339985	0.14504	0.134179	1.09505	3.07211	4.01695	0.141357	0.209669	1.85834	2.3452	5.91261	0.13996
770.141@6.1	0.282353	0.190606	0.287425	0.210476	0.139437	0.0770578	0.153835	0.120075	0.276542	0.271215	0.0471209	0.19389	0.142386	0.0660239	0.352347	0.0667425	0.18485	0.105371	0.221956	0.0485256	0.0710394	0.15023	0.234432	0.255183	0.0563124	0.113677	0.550723	0.290968	0.425709	0.134795
770.509@0.6	0.229373	0.438377	0.496212	0.295726	0.0965368	0.0787383	0.251196	0.0998722	0.347248	0.447994	0.0266422	0.146451	0.15161	0.103044	0.450331	0.0290747	0.229017	0.10825	0.275982	0.0438803	0.0948501	0.343019	0.0774092	0.312568	0.0452452	0.187449	0.121293	0.563742	0.223239	0.0808996
771.071@2.8	0.143046	0.150618	0.102055	0.05329	0.046482	0.0145356	0.0398067	0.0354072	0.168294	0.175394	0.00647331	0.0609637	0.0373022	0.00986401	0.110447	0.0173046	0.0578623	0.0347692	0.045787	0.0116594	0.00731684	0.0617139	0.139272	0.219799	0.0175021	0.0300959	0.137416	0.12451	0.132436	0.0245482
771.569@1.5	0.00530863	0.0608144	0.0140768	0.0128963	0.00384199	0.0029201	0.00556791	0.00442455	0.0300338	0.0348547	0.00161667	0.00818094	0.00537233	0.00217771	0.0104929	0.00228278	0.00590908	0.00339563	0.00438987	0.00170107	0.00255909	0.0109319	0.0169521	0.0816848	0.00237418	0.00350771	0.028758	0.0254238	0.0540982	0.00268849
771.607@2.8	1.02497	4.02729	1.02163	1.22172	0.545891	0.403426	0.84526	0.572513	4.02335	3.58679	0.198756	2.54813	0.894156	0.270895	2.68053	0.279483	0.95	0.427054	0.861377	0.269051	0.182262	1.47148	1.72731	3.30651	0.125104	0.334825	2.4523	2.20976	2.51103	0.274284
772.524@0.6	0.238646	0.572978	0.444376	0.313831	0.0962703	0.0733503	0.254545	0.115278	0.401111	0.511453	0.0239137	0.172343	0.130837	0.0966364	0.501515	0.034604	0.241524	0.113907	0.255303	0.046865	0.082064	0.370113	0.0742536	0.298134	0.0397911	0.171094	0.112372	0.584896	0.225933	0.0780582
773.536@1.3	0.700198	3.27676	0.970778	0.922549	0.558925	0.467636	0.387067	0.47644	2.15415	2.87978	0.109156	0.509819	0.201072	0.197606	1.6231	0.277953	1.06862	0.168826	0.749172	0.126689	0.227399	2.72342	2.48837	9.97489	0.153613	0.283023	1.13716	1.71123	4.92154	0.152029
775.549@1.4	0.141426	0.533343	0.148958	0.294732	0.0776095	0.085929	0.096424	0.0615813	0.297639	0.437399	0.0200846	0.108972	0.0527277	0.0325161	0.255179	0.0535895	0.183349	0.0528246	0.107671	0.0243319	0.0491847	0.420134	0.221166	1.39442	0.0275398	0.0828853	0.172702	0.408916	0.913486	0.0324362
775.551@1.3	0.424159	2.15231	0.567956	0.48238	0.338311	0.311241	0.22988	0.300468	1.40292	1.90937	0.0701227	0.253543	0.236714	0.121111	1.0689	0.195455	0.690932	0.122281	0.496915	0.0738715	0.156763	1.85472	1.62371	8.09602	0.0931988	0.164034	0.741744	1.10725	3.46472	0.0964681
776,5539@0,6	0.0814669	0.285931	0.0936922	0.105798	0.0283053	0.0252582	0.0768451	0.054735	0.132486	0.190734	0.0114309	0.0823702	0.0265075	0.0175208	0.155254	0.0214747	0.0462816	0.0285813	0.0716561	0.0135673	0.023782	0.08015	0.137005	0.494129	0.0145493	0.0258881	0.181584	0.129826	0.264887	0.0187554
777.563@1.4	0.30682	1.79757	0.480505	0.409687	0.184804	0.163575	0.166382	0.19553	0.775616	1.11342	0.0541516	0.177403	0.167751	0.109756	0.608641	0.12954	0.384392	0.139267	0.311205	0.0470737	0.16249	0.942896	0.986276	5.55234	0.0735486	0.134731	0.52463	0.828152	2.2985	0.0732205
779.579@1.4	0.130833	0.71919	0.214441	0.229643	0.0690658	0.0415753	0.0650106	0.0825957	0.305172	0.378625	0.0255518	0.168643	0.0760469	0.0510081	0.233648	0.0497205	0.129575	0.0721305	0.0936754	0.0334475	0.0817621	0.231119	0.259827	2.40878	0.0259181	0.0610444	0.531829	0.379272	0.935495	0.067322
779.58@1.4	0.0266105	0.171959	0.0432201	0.0450628	0.0133135	0.0095913	0.014994	0.0134644	0.0603779	0.0886424	0.00628159	0.0220023	0.00910642	0.00840296	0.0413607	0.0116165	0.0244118	0.0159488	0.0159884	0.00388415	0.0197052	0.0443676	0.039823	0.342388	0.00669294	0.0162984	0.0623912	0.0760061	0.204892	0.00629461
780.381@0.7	0.153536	0.536503	0.233741	0.0952062	0.152173	0.0879739	0.0821406	0.121146	0.539396	0.705434	0.0251309	0.262922	0.0725623	0.0424015	0.417155	0.0183566	0.191493	0.0832283	0.177665	0.064646	0.0557766	0.268348	0.625596	1.11945	0.0238218	0.0593373	0.343626	0.0596805	1.19086	0.0401417
781.476@1.4	0.108405	0.621748	0.191787	0.123385	0.060442	0.0338143	0.0740225	0.0658242	0.216553	0.576439	0.0165778	0.13349	0.0331364	0.0226734	0.179657	0.0226285	0.113431	0.0221134	0.086273	0.0220865	0.0309836	0.272712	0.24023	0.810148	0.0206335	0.0469133	0.282246	0.269022	0.647174	0.0314037
781.563@2.7	52.8291	98.1116	61.0266	50.8616	21.9876	13.9839	26.919	24.1068	71.9416	99.303	3.79062	44.0714	21.3435	7.29636	55.7975	4.74972	25.5089	12.4349	18.1357	8.04523	6.58307	33.3025	66.4898	99.372	3.79077	12.3438	69.7017	81.7272	60.2609	9.25203
782.629@3.4	0.154625	0.981201	0.18086	0.278222	0.0851464	0.0544385	0.0739306	0.109154	0.479494	0.681823	0.0185089	0.201091	0.0387601	0.025302	0.483255	0.0311207	0.131561	0.0500729	0.196568	0.0274859	0.0490567	0.470312	0.508808	1.64173	0.0220708	0.0591948	0.429242	0.350902	0.989539	0.0367532
783.502@1.2	0.0317219	0.0599405	0.0177313	0.0492903	0.0129741	0.0151825	0.0204992	0.00497732	0.0504487	0.0437769	0.000903616	0.0169629	0.00933875	0.00296974	0.0402214	0.00240916	0.0346844	0.0042643	0.0319166	0.00432409	0.00622163	0.0397409	0.0150112	0.053474	0.00180992	0.00978615	0.0728979	0.0474518	0.0407913	0.00595355
783.579@2.7	24.1874	100.211	39.7994	29.953	18.7769	13.5686	22.1061	21.9807	77.506	70.0284	3.63822	29.3491	20.132	7.62726	30.349	3.73244	27.8398	13.2536	14.8539	5.55097	6.10013	33.0944	57.4629	120.92	3.09043	13.7545	68.3631	40.6051	51.6842	10.7912
786.661@3.4	0.308284	1.61997	0.391675	0.557839	0.160178	0.0934813	0.16804	0.146859	0.775445	1.07348	0.0248122	0.288584	0.0815695	0.0535263	0.745343	0.0487651	0.26005	0.08653	0.327096	0.0493796	0.0857789	1.1269	0.760273	2.76517	0.0351394	0.118979	0.6091	0.745116	1.56288	0.0518939
787.536@1.2	1.12407	5.26111	1.24309	3.18561	0.873297	0.552924	0.986054	0.729486	2.90227	4.49381	0.122101	1.75537	0.785023	0.25417	2.86773	0.181238	1.39696	0.41218	1.0958	0.252567	0.283713	1.2982	4.25928	8.33442	0.155578	0.442596	1.8095	2.87946	5.23416	0.209335
791.566@2.8	0.212948	0.449049	0.342765	0.167799	0.108965	0.0810624	0.102436	0.107018	0.333951	0.458849	0.0597243	0.197451	0.0838271	0.0682199	0.195419	0.0537779	0.196931	0.102211	0.143672	0.0424766	0.0809487	0.152203	0.219674	0.593588	0.0650164	0.0995007	0.685238	0.234039	0.429885	0.0830226
791.584@2.6	7.35751	13.3816	13.9901	9.86224	5.5959	2.23607	3.85412	3.58948	11.4443	22.4742	0.473997	6.07198	2.82952	1.56498	16.5427	1.67214	10.2829	1.19602	4.68855	1.5552	1.64868	6.13905	8.79539	21.6914	1.64022	3.0114	6.22223	16.6295	9.66572	0.99884
793.582@0.6	0.125075	0.290737	0.104514	0.127696	0.040136	0.0328186	0.0979362	0.0629916	0.146782	0.22727	0.0178188	0.110276	0.0424804	0.0156817	0.1911	0.0090459	0.0556189	0.031545	0.0645525	0.0165465	0.0271424	0.093035	0.0806792	0.303662	0.0237186	0.034492	0.241501	0.131299	0.284611	0.0221782
793.6@2.6	7.10435	13.2165	14.0356	9.99451	3.56918	2.21219	8.22042	3.57769	10.7703	22.7725	0.473085	5.76795	5.06314	1.59765	16.819	2.91983	11.0182	1.19744	21.1855	1.55876	1.66377	15.5252	8.25025	22.5636	1.0366	3.09345	6.26353	9.76892	9.93658	0.924549
793.904@2.3	0.121844	0.477507	0.179437	0.125988	0.0592945	0.0494814	0.0711213	0.0643441	0.229952	0.3744	0.0312093	0.152896	0.0577282	0.039562	0.155433	0.0371692	0.103013	0.0482291	0.0854138	0.0263812	0.0449787	0.0558456	0.180754	0.356061	0.0343014	0.066694	0.45747	0.210913	0.605019	0.0503653
794.509@0.6	0.0868947	0.229935	0.191767	0.135446	0.0355935	0.0389342	0.15311	0.0314127	0.0858408	0.0906876	0.0100457	0.0648644	0.0447604	0.0205976	0.133203	0.0188862	0.0719467	0.0367667	0.172798	0.0185037	0.0415938	0.0808918	0.0366636	0.12573	0.0266058	0.091127	0.0934342	0.158166	0.082699	0.0441555
794.603@2.6	3.12306	6.49727	6.12915	5.29912	2.32921	0.837322	3.56778	1.5961	5.27169	11.7546	0.215827	3.00096	2.44472	0.671644	7.70623	1.15792	3.93848	1.24517	7.64428	0.696276	0.690273	5.93626	5.04159	10.0785	0.448147	1.31111	8.99293	5.13373	4.51878	1.25266
795.07@2.7	0.235662	0.621469	0.220839	0.204693	0.099117	0.070438	0.109937	0.0994527	0.40182	0.455968	0.021648	0.190251	0.106649	0.0420195	0.241335	0.047385	0.127341	0.0846147	0.124362	0.0362867	0.0295345	0.132949	0.382209	0.604438	0.048525	0.061086	0.354793	0.366969	0.386202	0.0484179
795.55@2.8	0.140393	0.248967	0.236247	0.095751	0.066948	0.0498036	0.0695396	0.0627141	0.203639	0.28256	0.0543769	0.143096	0.0555788	0.0569563	0.121748	0.0467571	0.128921	0.0805744	0.105483	0.0292511	0.0633032	0.0779877	0.127404	0.304323	0.0513038	0.0800487	0.511575	0.133281	0.257693	0.073071
795.61@2.6	3.03124	7.59366	5.32006	3.64954	2.32438	1.04018	3.48982	1.75164	6.96837	13.7505	0.213555	3.2301	2.26503	0.701846	8.92301	1.26479	5.34913	0.614657	7.21617	0.712618	0.649749	6.19517	4.90476	12.1365	0.46482	1.24935	3.00199	7.20829	4.94361	1.11324
796.078@2.7	0.622027	0.741697	0.340092	0.259755	0.19529	0.0795861	0.221717	0.210979	0.510219	0.721311	0.0149411	0.317583	0.222373	0.0322744	0.474497	0.013555	0.151837	0.101709	0.156344	0.0672292	0.0217707	0.194072	0.756558	0.602069	0.0534585	0.0581527	0.290749	0.74614	0.695954	0.0395073
796.524@0.6	0.0790229	0.284556	0.16043	0.122757	0.0318868	0.0324307	0.15757	0.0298998	0.0803806	0.0957729	0.010854	0.0605677	0.0481426	0.026476	0.129777	0.0144251	0.0618673	0.0362527	0.139298	0.0163204	0.0364442	0.0783093	0.0589584	0.182496	0.0245962	0.0901143	0.111483	0.141983	0.0792489	0.042184
796.617@2.7	0.865458	2.65975	1.47294	1.09703	0.564508	0.361743	0.987937	0.518659	2.00729	4.8867	0.0669889	1.29751	0.791936	0.174436	2.65693	0.283312	1.03443	0.183467	1.2406	0.212298	0.156285	1.2375	1.50099	3.25649	0.123973	0.330432	2.62412	2.13459	1.44471	0.357825
797.527@0.6	0.0400001	0.11756	0.087206	0.0707944	0.0200658	0.0152083	0.0724778	0.0170654	0.0442657	0.051714	0.00548606	0.0362133	0.0234483	0.00999299	0.0698779	0.010963	0.03493	0.0191259	0.0707601	0.00843129	0.0150601	0.034927	0.0551829	0.174907	0.0102817	0.0409771	0.0847889	0.0708076	0.0684146	0.0203466
807.07@2.7	0.120557	0.285042	0.162015	0.183807	0.0623989	0.0290939	0.0796799	0.0583268	0.14494	0.262217	0.0220064	0.112545	0.0638395	0.0317788	0.117254	0.0308561	0.055233	0.0401784	0.0734112	0.0249254	0.0367467	0.0704191	0.229923	0.352572	0.0321321	0.0529652	0.292343	0.177289	0.233846	0.0261699
807.579@2.6	36.6036	72.1399	47.4055	46.7864	16.4607	8.53982	21.2066	17.6425	38.1971	66.4525	2.20237	32.3831	17.7993	3.42322	36.6679	3.11524	15.5246	8.44462	15.2801	6.29141	3.34408	19.4356	64.2607	98.3474	2.64315	7.69128	37.0743	56.0474	59.1808	5.38495
809.426@2.2	0.0495814	0.235133	0.123388	0.0838826	0.0339829	0.0301117	0.0480887	0.0325704	0.113187	0.189147	0.0201545	0.0731987	0.0233435	0.0212561	0.0720372	0.018746	0.0725253	0.0284759	0.0452668	0.0140202	0.02945	0.0566696	0.0501443	0.232617	0.0249996	0.0482248	0.236291	0.0938231	0.306041	0.033518
809.529@3.5	0.0708184	0.223793	0.124678	0.128944	0.0411311	0.0337339	0.0659717	0.0443145	0.13968	0.206515	0.0134069	0.0858778	0.0371198	0.0230156	0.124979	0.0164148	0.0981984	0.0317548	0.0740711	0.0165921	0.0251727	0.0944635	0.127998	0.270813	0.0150132	0.0403141	0.237083	0.145196	0.181414	0.0294472
809.595@2.6	29.1254	73.8846	38.3383	50.4392	15.5622	7.53589	23.066	15.0363	36.4728	71.3353	1.77048	27.5647	15.3322	6.20365	40.3491	4.2961	19.0709	6.59087	27.3119	4.68411	3.41908	27.2032	60.0577	101.929	2.61763	8.02871	27.8093	52.2087	66.6204	3.77285
810.598@2.6	8.83005	28.6037	9.39275	17.2046	4.04209	2.13806	6.26077	4.95167	10.9809	22.6113	0.596158	9.60924	4.32822	0.83226	10.2352	0.604763	3.75342	2.20773	2.52684	1.87959	1.88371	5.30471	20.5979	37.7812	0.681876	3.19565	9.08196	15.041	24.5295	1.17697
810.662@3.4	0.75123	2.56725	1.22127	0.905054	0.479403	0.217666	0.524457	0.345033	2.50171	3.38743	0.0680873	0.81854	0.357253	0.185368	0.944753	0.237363	0.797534	0.234384	0.589847	0.14265	0.24548	0.866229	2.79791	4.19224	0.0992216	0.407547	2.54599	2.65381	5.34629	0.3206
811.537@0.6	0.139169	0.29687	0.201254	0.171455	0.0453834	0.0407328	0.182921	0.0408292	0.114327	0.110788	0.0114289	0.0981834	0.0502069	0.0254632	0.179489	0.0150063	0.088361	0.0435102	0.20915	0.0217238	0.0388247	0.0969755	0.141304	0.393811	0.0309828	0.0893356	0.086641	0.183789	0.330105	0.0512204
811.606@2.7	2.35908	15.081	3.93071	6.34577	1.32751	0.911526	2.72005	2.32281	5.82155	11.5626	0.280883	4.36337	2.08724	0.401922	4.74532	0.251566	1.8559	1.12122	1.84676	0.840149	0.339403	2.51119	4.04128	16.5462	0.293726	0.995283	4.36203	6.57461	8.56222	0.548905
812.537@1.2	0.154187	0.591136	0.107476	0.430992	0.0767482	0.0452582	0.107974	0.0535543	0.261657	0.42925	0.0103052	0.183926	0.0585682	0.0134713	0.288138	0.0208854	0.126829	0.0278933	0.107401	0.0265904	0.0226132	0.266799	0.23454	0.820654	0.0182882	0.0466062	0.18293	0.283708	0.523805	0.0183134
812.538@1.2	0.6382	2.10647	0.995473	1.43441	0.353123	0.206858	0.424291	0.270751	1.19196	1.70535	0.144292	0.772819	0.305305	0.211581	1.1786	0.200293	0.49885	0.26551	0.467509	0.118002	0.244015	0.918566	1.40476	4.59281	0.0710749	0.184113	2.09898	1.14226	2.36115	0.273785
812.611@2.7	1.56139	6.46409	1.24366	2.18092	0.660346	0.398361	1.08699	0.950007	3.15394	4.95732	0.125986	1.75987	1.00738	0.198437	2.09809	0.112018	0.946931	0.444938	0.384984	0.335632	0.157456	1.16822	3.03543	6.9184	0.124932	0.423334	2.26693	2.81962	3.67847	0.280878
812.677@3.4	0.505203	4.08752	0.916209	1.22563	0.356634	0.15158	0.339626	0.263744	1.98155	2.76767	0.0554164	0.604205	0.288322	0.145057	1.73194	0.0990163	0.574431	0.16324	0.535658	0.104593	0.184596	3.16462	2.31879	7.84075	0.0732706	0.275629	1.47879	2.10997	4.37308	0.112831
813.548@1.2	0.104647	0.509811	0.0679799	0.259297	0.0496085	0.0367444	0.0867564	0.0503395	0.230466	0.342046	0.00801007	0.137114	0.0433409	0.00764446	0.209279	0.0128108	0.0917834	0.0202676	0.0642566	0.020982	0.0116736	0.142983	0.145432	0.613954	0.0112215	0.0367617	0.125592	0.193012	0.427701	0.0133143
813.621@2.7	0.833384	2.99932	0.590818	0.843563	0.32189	0.196906	0.498745	0.415442	2.05818	2.33518	0.0660892	0.791085	0.599136	0.115995	1.10051	0.173358	0.570781	0.435084	0.488882	0.150927	0.088324	0.660157	1.63953	3.48646	0.0633831	0.204456	1.4704	1.4561	1.89446	0.181741
815.116@8.2	0.0160866	0.0328341	0.048646	0.0503951	0.00421464	0.00588301	0.0429056	0.00394641	0.0184469	0.0282471	0.0133772	0.0116842	0.00681911	0.0042936	0.0389522	0.0199439	0.00409935	0.00548345	0.0388388	0.000649157	0.0089278	0.00507449	0.012614	0.0914841	0.0102125	0.0357106	0.0639759	0.0674451	0.0616227	0.0481533
815.559@1.2	0.0309047	0.110775	0.0226246	0.0392341	0.0118917	0.00798716	0.0179529	0.010281	0.0759808	0.0717275	0.00202001	0.0233624	0.0112015	0.00288447	0.0381028	0.0032183	0.0184726	0.00754547	0.0102941	0.00336956	0.00282021	0.0449867	0.0330974	0.14645	0.00159056	0.00583732	0.0387732	0.0429459	0.0520907	0.00380685
817.599@2.6	1.35905	4.19483	1.57998	1.29324	0.758973	0.567779	1.1624	0.607741	2.77912	3.30622	0.2859	1.54981	0.649121	0.282247	2.92801	0.59084	3.22955	0.549468	3.87814	0.232876	0.259977	3.07538	2.17294	4.65386	0.179602	0.461452	4.2297	2.22587	5.11871	0.616585
819.616@2.6	0.76036	1.77606	1.23942	1.01683	0.541658	0.312386	0.77175	0.403464	1.95066	2.36271	0.168931	0.853865	0.396416	0.203802	1.91377	0.325768	0.72576	0.30445	0.641721	0.151152	0.183542	0.79004	1.2547	3.34082	0.110386	0.312496	2.41054	1.44863	2.81615	0.337523
820.524@0.6	0.0890106	0.235398	0.25843	0.2181	0.0891596	0.105805	0.209666	0.0519739	0.259959	0.190849	0.0153742	0.134663	0.215574	0.0262365	0.351791	0.0222354	0.187664	0.0513464	0.122998	0.042698	0.0297164	0.197135	0.0707282	0.130964	0.0433417	0.117061	0.0987872	0.466259	0.123673	0.0785038
821.527@0.6	0.0491063	0.12988	0.146646	0.119195	0.0440935	0.0482332	0.103218	0.0255267	0.125414	0.105086	0.00782386	0.0637112	0.100011	0.0144048	0.172085	0.0127435	0.0877104	0.0296445	0.0642693	0.0206328	0.016843	0.0986584	0.0323597	0.0852245	0.0217521	0.0664032	0.0735901	0.227039	0.0624313	0.0367912
822.568@2.8	0.0767314	0.206799	0.105065	0.0610851	0.0352849	0.0318248	0.040456	0.0365383	0.126463	0.178909	0.0259355	0.0778314	0.0315895	0.029285	0.0771056	0.0230239	0.0732007	0.0435692	0.0456658	0.0156099	0.0311811	0.0471691	0.0755321	0.231575	0.0274859	0.0433367	0.252559	0.0972499	0.232425	0.0443382
823.574@2.8	0.104612	0.204842	0.143736	0.10579	0.0556832	0.0439307	0.0689668	0.0548599	0.165915	0.250639	0.0244476	0.114162	0.054959	0.0357657	0.168152	0.0330171	0.140553	0.0424116	0.119866	0.0230987	0.0409388	0.141527	0.147608	0.260555	0.0353101	0.0600098	0.330733	0.202244	0.376987	0.047772
824.554@0.6	0.0188888	0.0565029	0.057922	0.0468751	0.00962543	0.00799882	0.0333211	0.00471709	0.0272486	0.0314203	0.00161873	0.00997419	0.0163732	0.00561999	0.0349808	0.00405411	0.0192683	0.0141233	0.0286441	0.00479683	0.00787976	0.0237186	0.0227848	0.0798931	0.00538144	0.025259	0.0240375	0.0485328	0.0275458	0.00675392
825.557@0.6	0.00927419	0.0288015	0.0247608	0.0233513	0.00418733	0.00376158	0.0150557	0.0022611	0.0133984	0.0147256	0.00167873	0.0041581	0.00711413	0.00233316	0.0163671	0.00244188	0.00849838	0.00688388	0.0129494	0.00234999	0.00367827	0.0108175	0.0128054	0.0509351	0.00338318	0.0119685	0.0147897	0.0197423	0.0200329	0.00319085
829.562@2.6	4.67567	9.5619	5.36117	4.4582	2.21758	1.76328	2.91854	1.68094	7.72862	9.23998	0.29418	4.46898	2.38117	0.594052	5.50606	0.827514	2.60021	1.24822	1.77261	0.984814	0.480652	2.83428	4.9762	14.2121	0.407241	1.10122	6.18806	4.86266	8.09339	1.19767
83.037@6.9	0.115536	0.197928	0.257037	0.218523	0.130723	0.10022	0.167269	0.0399578	0.330569	0.543685	0.0847137	0.2309	0.121865	0.146136	0.211305	0.144136	0.184249	0.143161	0.328545	0.0545795	0.211891	0.211871	0.328973	0.33104	0.221419	0.518505	0.391557	0.159809	0.39992	0.0773771
831.577@2.6	7.33094	15.4437	8.12642	5.60587	3.25026	2.45513	4.73488	3.65837	11.695	14.8009	0.40108	6.82605	3.69911	0.877395	8.16565	0.587767	4.19716	2.21541	2.67672	1.56441	0.679719	3.59877	13.9966	23.8735	0.573893	1.6441	14.5632	7.55078	13.2257	1.9175
833.515@1.1	0.235658	0.95058	0.159333	0.317851	0.104604	0.124804	0.170536	0.0808499	0.562393	0.553672	0.0131097	0.194796	0.0443205	0.020805	0.577182	0.0310278	0.315566	0.0348467	0.195356	0.0418676	0.0271996	0.38633	0.43436	1.29472	0.0239601	0.0664509	0.277776	0.367821	1.16274	0.0390641
833.518@1.1	0.744592	2.09203	0.564028	1.18813	0.420536	0.420891	0.573109	0.271588	1.95834	1.77841	0.0443713	0.727278	0.301167	0.0652118	2.04571	0.0898757	0.945194	0.122495	0.723552	0.136532	0.0769708	0.9676	2.29203	6.81674	0.162461	0.21789	1.16317	1.21833	2.22892	0.111928
835.607@2.6	1.99935	4.47821	2.06715	1.97064	0.761883	0.429583	1.25483	0.818636	2.51741	3.36149	0.092584	1.22011	1.14348	0.187009	1.90044	0.123652	0.960036	0.929032	0.610066	0.311563	0.187966	1.13769	3.68621	6.57433	0.120208	0.42351	2.35547	2.98333	3.97416	0.287889
836.349@1.9	0.0287405	0.0834829	0.0775245	0.0376993	0.0201437	0.0228169	0.0298417	0.0200557	0.0554836	0.0924314	0.0197599	0.0488297	0.017679	0.0232378	0.0334208	0.0231503	0.0409616	0.0196198	0.0427536	0.0103317	0.0314267	0.0247348	0.0341064	0.0942064	0.0286194	0.0387833	0.160768	0.0376086	0.0986136	0.0305155
836.612@2.6	1.12455	2.91794	1.20619	1.29774	0.439208	0.238602	0.761422	0.464227	1.45517	2.09796	0.0663108	0.734908	0.674208	0.149161	1.09694	0.218023	0.573449	0.552268	0.352451	0.183613	0.13369	0.652997	1.98999	4.22246	0.220576	0.285266	1.49317	1.80797	1.96247	0.20838
837.547@1.1	0.133002	0.535152	0.0943812	0.21127	0.0455867	0.0442263	0.0956826	0.0318957	0.286761	0.260599	0.00883064	0.0911524	0.0227095	0.0127883	0.232525	0.0150806	0.14389	0.02602	0.121687	0.0161017	0.0192	0.199159	0.203421	0.759375	0.0110664	0.0360662	0.152894	0.182347	0.550029	0.0227191
837.552@0.6	0.18183	0.484332	0.314095	0.326964	0.105601	0.157186	0.305045	0.100179	0.326287	0.235991	0.0186364	0.18423	0.362219	0.0328967	0.219699	0.0310858	0.181002	0.0755282	0.232208	0.0600635	0.0417151	0.245012	0.289109	0.775588	0.0575497	0.165754	0.537305	0.305839	0.168057	0.090174
837.555@2.8	1.01843	1.47091	0.778526	0.49701	0.353258	0.237379	0.287006	0.330373	1.32843	1.56684	0.132507	0.587188	0.311837	0.183932	0.92446	0.176369	0.520482	0.25673	0.288932	0.115981	0.210013	0.549992	1.09292	1.83942	0.18256	0.314542	1.80487	1.06898	1.05537	0.24971
838.552@1.1	0.0631885	0.302041	0.0432997	0.112721	0.0201075	0.0177658	0.0447854	0.018062	0.118897	0.110007	0.00362178	0.0363723	0.0126079	0.00540504	0.0998234	0.00654374	0.0574464	0.0149943	0.052999	0.00755893	0.00994806	0.0833401	0.0862351	0.377506	0.00434692	0.0171881	0.0694334	0.090762	0.182985	0.0100243
838.625@2.6	0.651904	1.98881	1.09466	1.08869	0.365327	0.270347	0.630464	0.35497	1.44238	1.96746	0.135514	0.456916	0.395924	0.147235	1.32945	0.203676	1.07989	0.26023	0.549676	0.130029	0.139823	1.13908	1.025	3.29626	0.213796	0.242432	1.98861	1.32842	2.46903	0.104737
839.564@1.2	0.046727	0.190859	0.03288	0.096908	0.0143063	0.00897109	0.0336781	0.00792308	0.0714148	0.0746796	0.0029878	0.0205693	0.0118011	0.00461602	0.066066	0.00331822	0.0336399	0.0156236	0.0268868	0.00491845	0.00597905	0.042143	0.0551339	0.302029	0.00394894	0.0136916	0.0466003	0.0747974	0.203073	0.00575367
840.491@0.6	0.112257	0.233167	0.24347	0.207139	0.0854332	0.101113	0.186173	0.0531063	0.264492	0.155704	0.0137352	0.108059	0.0643139	0.0245078	0.287267	0.021172	0.163001	0.0465007	0.154608	0.0368333	0.0295867	0.127743	0.172757	0.200125	0.0428308	0.103888	0.37231	0.379004	0.422877	0.0563141
840.493@0.6	0.0226691	0.0489702	0.0621954	0.0774016	0.0240672	0.0511992	0.0682283	0.0126142	0.0303621	0.0244471	0.00291414	0.0277229	0.0248788	0.00336288	0.0434985	0.00639409	0.0473495	0.0142867	0.0453955	0.0154459	0.00767353	0.0280034	0.0314291	0.0535141	0.0174387	0.0312905	0.0467855	0.0584493	0.0340196	0.0184517
840.568@1.2	0.025605	0.0635863	0.0109217	0.0477641	0.00518028	0.00301476	0.0111912	0.00325475	0.0287843	0.0393662	0.00146336	0.0115352	0.00718154	0.00197912	0.0218225	0.00238319	0.0108533	0.00574241	0.00843641	0.00173152	0.00258291	0.0143689	0.0212682	0.0920229	0.00184015	0.00516676	0.0215774	0.0275519	0.0700055	0.00200567
842,5079@0,6	0.0328507	0.0712619	0.083632	0.104799	0.0295172	0.0594925	0.0862498	0.015313	0.0406386	0.0350093	0.00396151	0.0327686	0.034111	0.00485519	0.0582994	0.00799499	0.0561204	0.0211208	0.0596044	0.0186032	0.0110333	0.0367185	0.0330667	0.0601055	0.0208022	0.0431781	0.0517202	0.0756082	0.0408058	0.0220048
844.522@0.6	0.0248551	0.061389	0.0707829	0.0901507	0.0194806	0.0326732	0.0612453	0.0121698	0.0318723	0.026458	0.00423189	0.0165407	0.0262411	0.00394802	0.0469376	0.0042935	0.0346984	0.0193694	0.0413491	0.011435	0.00929672	0.0225631	0.0205646	0.0447014	0.0138347	0.0364325	0.0363043	0.0513416	0.0250356	0.0133773
85.017@1.6	0.0504384	0.172242	0.0735248	0.0523848	0.0288451	0.0225726	0.0391852	0.0245497	0.099559	0.130964	0.0134843	0.0584329	0.0250443	0.0138919	0.0614656	0.013949	0.0572371	0.022645	0.0386949	0.00672302	0.0213392	0.0491517	0.0310233	0.121188	0.0144996	0.0329534	0.1228	0.0794449	0.142426	0.0235879
85.089@4	0.233076	0.658078	0.207865	0.283506	0.242965	0.449608	0.19057	0.138762	0.136456	0.0439696	0.186675	0.163933	0.177559	0.206786	0.534147	0.315083	0.22217	0.175946	0.513291	0.0876948	0.422361	0.108731	0.316042	1.06879	0.285298	0.89059	0.543531	0.215878	0.376468	0.273247
851.497@2.8	0.0171	0.0649946	0.0532784	0.0154225	0.0114213	0.0122481	0.0132558	0.0096792	0.0293169	0.0363803	0.0220155	0.0284622	0.0089049	0.0217628	0.0142111	0.023069	0.020291	0.0178754	0.0317197	0.0055769	0.0280991	0.0131526	0.0396738	0.179393	0.0240084	0.0291393	0.14069	0.0344902	0.116909	0.0297531
851.546@2.5	1.47833	3.29212	1.74509	1.54032	0.503312	0.458765	0.953002	0.61801	2.2642	3.17204	0.0780062	1.07583	0.888253	0.238955	1.31323	0.0998482	0.548509	0.224622	0.49372	0.419231	0.116331	0.343792	2.31759	4.38363	0.128176	0.310423	1.7104	1.91519	2.65858	0.301529
853.562@2.5	0.993075	4.37343	2.33824	2.06815	0.708283	0.634819	1.27516	0.589117	3.13198	4.27882	0.104584	2.72552	0.577755	0.308315	1.79279	0.135633	0.822289	0.409783	0.686816	0.549804	0.156694	0.487817	1.76302	5.90787	0.155411	0.420758	2.32739	2.54851	3.59105	0.395539
855.5@1.1	0.148587	0.386154	0.133681	0.174813	0.0860416	0.0824184	0.111783	0.0532958	0.427581	0.325678	0.00781003	0.11645	0.0348458	0.0315477	0.364013	0.0193912	0.18746	0.0222435	0.149937	0.0308002	0.0152272	0.175805	0.402114	1.07908	0.0135993	0.0387332	0.250893	0.228436	0.725128	0.0254059
855.577@2.5	1.49837	3.19204	1.71567	1.55518	0.53935	0.478489	0.947299	0.6418	2.33725	3.21059	0.0761936	1.94121	0.813294	0.207395	1.38224	0.0981586	0.656786	0.377373	0.506103	0.39197	0.116071	0.400644	2.49132	4.59098	0.116998	0.306648	1.76969	1.87239	2.72208	0.285736
857.518@1.1	0.153558	0.439459	0.214728	0.174848	0.0911925	0.0815869	0.125688	0.0571108	0.435423	0.3376	0.0288168	0.122375	0.0379163	0.0434431	0.417668	0.0450466	0.199936	0.0224103	0.158045	0.0299206	0.0517878	0.179995	0.419576	1.14096	0.0146132	0.0414606	0.266294	0.241829	0.76671	0.0261509
859.533@1.1	0.130626	0.428427	0.160222	0.169019	0.0518324	0.0443999	0.0755842	0.0357976	0.280049	0.24065	0.0223152	0.0974663	0.0508968	0.0163408	0.128814	0.0337546	0.12361	0.0314413	0.123124	0.024492	0.0209361	0.142571	0.244802	0.83407	0.037133	0.0590708	0.217617	0.185341	0.4777	0.0449552
859.539@2.7	0.960409	2.36059	1.30479	1.10847	0.441656	0.326221	0.53188	0.457048	1.41491	1.97705	0.183196	0.84433	0.4074	0.252297	1.03212	0.244696	0.708149	0.238993	0.387893	0.165102	0.291501	0.649175	1.38027	2.1344	0.260467	0.439051	2.54168	1.53331	2.8448	0.348665
859.604@2.6	0.443018	0.829988	0.523514	0.485335	0.173452	0.124979	0.29767	0.165022	0.589907	0.678558	0.0228183	0.263061	0.251354	0.0486584	0.413796	0.047729	0.272118	0.227714	0.193535	0.0725423	0.0501527	0.253982	0.698215	1.45129	0.0401629	0.114404	0.577035	0.671707	0.940616	0.0559617
861.553@2.7	0.844874	2.07005	0.815048	0.723226	0.358837	0.266167	0.400355	0.397428	1.3967	1.82176	0.141942	0.776186	0.374298	0.204907	0.964737	0.194714	0.514109	0.242966	0.504393	0.141844	0.228787	0.641855	1.12981	1.57862	0.200801	0.351917	1.13544	1.48869	0.95313	0.269184
866.508@0.6	0.198488	0.117559	0.100451	0.185254	0.0927664	0.187349	0.171874	0.0410873	0.138972	0.0788572	0.0111266	0.139922	0.234141	0.0180296	0.183296	0.0196137	0.125045	0.0360936	0.0342894	0.0503737	0.00649508	0.0751072	0.0811039	0.0517981	0.0327501	0.0837055	0.116959	0.231794	0.0905405	0.0485432
867.088@5.4	0.0141953	0.0506375	0.0374524	0.0285037	0.0200717	0.0218758	0.0135174	0.0101992	0.0303137	0.0364454	0.00984727	0.0166898	0.00811644	0.0128844	0.0251907	0.0180857	0.0253538	0.0192611	0.0264127	0.00590741	0.0239141	0.0141799	0.0229917	0.0899331	0.02183	0.0395821	0.0545273	0.0261803	0.0793877	0.0149757
869.485@1.2	0.0197815	0.0399214	0.00873045	0.0502769	0.0100694	0.00789735	0.0114282	0.00519536	0.0392383	0.0573404	0.000936657	0.0238123	0.00942358	0.00171215	0.0284766	0.00197847	0.0289797	0.00434939	0.0141345	0.00236985	0.0028293	0.0334261	0.0259959	0.0457832	0.00173708	0.00545105	0.0160924	0.0441509	0.0410216	0.00281176
871.573@2.6	0.144279	0.281239	0.275104	0.206116	0.105459	0.0397751	0.152852	0.0889526	0.31358	0.406669	0.0412255	0.11566	0.0984772	0.0595768	0.295064	0.0583843	0.167497	0.0719022	0.317488	0.0395686	0.0694679	0.253581	0.274048	0.822087	0.0600783	0.0983587	0.550441	0.311919	0.657914	0.079867
875.495@2.6	0.0105946	0.0266477	0.0564324	0.0177395	0.00891356	0.0148268	0.0137087	0.00824987	0.0193513	0.0275912	0.0158225	0.0242829	0.00678383	0.0170108	0.008993	0.0221999	0.0191304	0.00962271	0.0235247	0.0054209	0.0283265	0.00507997	0.0115885	0.0316794	0.0260931	0.0300356	0.102233	0.00907084	0.0336293	0.0224222
876.529@3.5	0.0511629	0.124264	0.0731603	0.0895533	0.027769	0.0256461	0.043301	0.0276075	0.0822426	0.112326	0.00739506	0.0437538	0.0245636	0.0146716	0.0691736	0.0102037	0.0633606	0.0244696	0.0455708	0.00676361	0.017189	0.0606269	0.0419627	0.102933	0.0093869	0.0258424	0.0842209	0.0859797	0.078604	0.0159984
888.492@0.6	0.0690289	0.157375	0.0993607	0.101223	0.0601567	0.0972011	0.087481	0.0385894	0.0888928	0.0556047	0.00467897	0.0786099	0.175254	0.0242415	0.117858	0.0208155	0.0671693	0.0189475	0.0584718	0.0242557	0.0233192	0.0496249	0.100749	0.270283	0.0187923	0.0416526	0.114463	0.134791	0.057579	0.0299894
889.478@1.6	0.0443778	0.11906	0.0399643	0.0383308	0.0138439	0.0091828	0.0121582	0.0142267	0.0745974	0.109549	0.00437576	0.0315512	0.0108897	0.00511541	0.0520707	0.00251389	0.0224961	0.0107446	0.0104021	0.00498708	0.00627683	0.0453554	0.0443228	0.140525	0.00306162	0.0106527	0.105182	0.070491	0.142453	0.0087965
89.049@6.3	0.0116003	0.0332671	0.0318474	0.0161474	0.0120736	0.0182466	0.00881881	0.00886454	0.0239572	0.0310947	0.0117144	0.0143553	0.00826749	0.00996857	0.0176957	0.00980678	0.0207164	0.0102534	0.018899	0.00462846	0.0159721	0.0145313	0.0152174	0.0320754	0.017431	0.0269299	0.056193	0.0351529	0.0425369	0.00992898
892.496@1.6	0.0169985	0.0500664	0.018553	0.017868	0.00521949	0.00466731	0.00765862	0.00499375	0.0276737	0.0436011	0.0024617	0.0104335	0.00387132	0.00250898	0.0214601	0.00220258	0.0123726	0.00460046	0.00722092	0.00236716	0.00259019	0.0179498	0.0193838	0.0583591	0.00255088	0.00593152	0.0415323	0.025753	0.0735635	0.00385367
897.483@1.4	0.197312	0.908535	0.284256	0.176864	0.0843773	0.0471921	0.1154	0.0967279	0.309772	0.8411	0.0236141	0.18816	0.047013	0.0334174	0.282403	0.0216739	0.155017	0.0308406	0.11487	0.0323981	0.0306563	0.396254	0.317048	0.665085	0.0293819	0.0725136	0.263964	0.463463	0.933868	0.0372831
898.485@1.4	0.104964	0.519395	0.148723	0.0969586	0.0432637	0.0248302	0.0596225	0.0515875	0.167345	0.438614	0.012524	0.108278	0.0258053	0.0178515	0.145968	0.0119347	0.0845193	0.0173351	0.0610064	0.0175854	0.0163792	0.203211	0.16325	0.351238	0.0157198	0.0385448	0.14595	0.240883	0.475793	0.0215185
90.978@1.9	0.0737621	0.194768	0.176636	0.0968666	0.046035	0.0523316	0.0690091	0.0471109	0.135904	0.192719	0.038326	0.118005	0.0476962	0.0505971	0.0844994	0.0516247	0.0997638	0.0471624	0.0961189	0.0235255	0.0662743	0.0541845	0.0836827	0.227792	0.0576803	0.0817365	0.351228	0.105677	0.241448	0.0725103
901.509@2.5	0.0313139	0.0868545	0.122334	0.0484915	0.0231678	0.0217238	0.0332978	0.0229054	0.0444142	0.084313	0.0254186	0.0630497	0.0212484	0.0246074	0.0297242	0.0254929	0.0336296	0.0279244	0.0353358	0.0124019	0.0309933	0.0143384	0.0409966	0.126891	0.0339794	0.0481173	0.171286	0.0315707	0.11777	0.0374688
910.555@1.1	0.110104	0.475545	0.0772958	0.09664	0.0395758	0.0301784	0.0800123	0.0383266	0.335579	0.252491	0.00998954	0.14263	0.0459284	0.0180732	0.173217	0.0162957	0.0792406	0.0337026	0.0673626	0.0163704	0.0227942	0.16145	0.17828	0.696759	0.0138762	0.0369808	0.205523	0.170511	0.312658	0.0183675
911.498@1.4	0.0160967	0.0720664	0.0174696	0.0126609	0.00598598	0.0040995	0.0063965	0.00734839	0.0324211	0.062945	0.0014443	0.0172597	0.00542198	0.00238804	0.024841	0.00240479	0.00982905	0.00266671	0.00702524	0.00249326	0.00272691	0.0259418	0.0225091	0.0583684	0.00199422	0.00379978	0.0268216	0.0285797	0.067787	0.00315734
912.57@1.1	0.10798	0.49872	0.0779773	0.111479	0.0354887	0.0249327	0.081521	0.0316495	0.309883	0.234294	0.0100277	0.131711	0.0466689	0.0158325	0.156455	0.017205	0.0699052	0.0342372	0.0400179	0.015858	0.020811	0.141518	0.153887	0.696545	0.0136389	0.0354806	0.189485	0.172815	0.31313	0.0167686
915.492@1.5	0.12415	0.555683	0.132488	0.18378	0.0496704	0.0404625	0.0659313	0.0518195	0.346456	0.469026	0.0190219	0.122385	0.0546519	0.0268089	0.165736	0.0165012	0.0950538	0.0462562	0.0567184	0.0185177	0.0307008	0.174546	0.180959	0.619811	0.021656	0.0392198	0.355581	0.292497	0.604108	0.0365283
917.507@1.5	0.084153	0.410614	0.0949025	0.123112	0.0359188	0.0289419	0.0475238	0.0357489	0.252853	0.338762	0.0142757	0.0818273	0.039433	0.0195483	0.114846	0.0127927	0.0702173	0.034789	0.0241547	0.0129153	0.0217886	0.123431	0.137294	0.460159	0.0163855	0.0290378	0.244671	0.208176	0.459671	0.026776
925.513@1.4	0.0963805	0.783157	0.180227	0.163223	0.0627538	0.0458413	0.0661904	0.066104	0.233978	0.613682	0.0206699	0.116204	0.0392327	0.0291221	0.213045	0.030833	0.0927768	0.0286713	0.0770908	0.0209481	0.0401493	0.289283	0.197638	0.889089	0.0270343	0.0486959	0.166042	0.308713	0.863047	0.0290878
926.515@1.4	0.0510092	0.406877	0.098259	0.0920731	0.0338912	0.0230163	0.0333863	0.0351479	0.121217	0.327029	0.0108231	0.0597092	0.0250897	0.015307	0.112384	0.0163615	0.048247	0.015538	0.0388097	0.0107804	0.0206974	0.141677	0.099918	0.480139	0.0139832	0.0261415	0.0863161	0.167948	0.464968	0.0147973
926.665@0.7	0.0696903	0.11671	0.447551	0.252013	0.152402	0.0406947	0.194904	0.0373109	0.270731	0.415452	0.0795971	0.238105	0.0313846	0.140054	0.0804243	0.120344	0.229722	0.121394	0.320486	0.0701486	0.175782	0.14554	0.192549	0.499221	0.124892	0.23232	0.666289	0.0841686	0.437635	0.169559
936.497@3.5	0.0572551	0.147304	0.0833915	0.105558	0.038462	0.0307528	0.0514305	0.0332344	0.100459	0.144919	0.00865133	0.05206	0.0298052	0.0181249	0.0812518	0.00987755	0.070414	0.0289932	0.0526534	0.00851781	0.0195739	0.0734362	0.0508184	0.129505	0.0113955	0.029805	0.103165	0.102762	0.0974013	0.0190802
939.494@1.4	0.245304	1.15094	0.416022	0.352866	0.112203	0.0550912	0.163868	0.0973901	0.523303	0.944347	0.0283116	0.266552	0.121593	0.0282162	0.321314	0.0369533	0.126445	0.058319	0.105229	0.043453	0.0395577	0.291683	0.424417	1.59449	0.0370622	0.0720232	0.518933	0.674876	1.10362	0.0446256
941.509@1.4	0.139758	0.809777	0.267205	0.639084	0.0691291	0.0371617	0.117497	0.0597174	0.386463	0.617828	0.019262	0.182502	0.0823599	0.0212384	0.216894	0.0425769	0.0866466	0.0330915	0.0585192	0.0284051	0.0295894	0.229036	0.359879	1.40282	0.0298656	0.0446077	0.343371	0.472553	1.25833	0.0300104
942.512@1.4	0.0673513	0.447438	0.132567	0.33177	0.0343696	0.0202103	0.0611823	0.0315858	0.207659	0.328346	0.0110394	0.0980685	0.0444779	0.0108899	0.112635	0.0231687	0.0456415	0.0177191	0.0296385	0.0151614	0.0159166	0.117766	0.188938	0.771983	0.0173231	0.0253843	0.177928	0.247256	0.676473	0.0166724
947.499@1.4	0.0440921	0.25281	0.0657868	0.0982422	0.0331435	0.0360116	0.0290907	0.032778	0.131612	0.208163	0.00826317	0.0485897	0.0143374	0.0105311	0.104551	0.0212745	0.0839858	0.0132053	0.0458993	0.00758082	0.0202553	0.192075	0.076286	0.531792	0.011712	0.0221731	0.0930516	0.122606	0.41848	0.0109438
963.501@1.4	0.0407552	0.129551	0.0605849	0.0568283	0.0282915	0.0212959	0.0257786	0.0216411	0.13339	0.160015	0.00554015	0.041214	0.0114354	0.00729211	0.0680489	0.00844547	0.0587223	0.0130084	0.0204378	0.00673126	0.0101565	0.0741025	0.0894012	0.385369	0.00681932	0.0145058	0.111394	0.0963525	0.272352	0.00818916
964.275@6.1	0.161579	0.285559	0.112294	0.0814501	0.103268	0.113852	0.0737558	0.0583638	0.0875388	0.0641714	0.0633037	0.0614251	0.0745668	0.0910855	0.193083	0.114603	0.0711083	0.0662526	0.170265	0.0248293	0.113593	0.0519899	0.0675797	0.435662	0.077662	0.179871	0.194168	0.18663	0.0902124	0.0952288
971.495@0.6	0.109995	0.101189	0.141559	0.057337	0.0492928	0.0144121	0.0593021	0.0415846	0.0809546	0.213128	0.0100916	0.0690721	0.0360797	0.0159875	0.143486	0.0119909	0.0352535	0.0207582	0.045674	0.0132304	0.0097784	0.0462183	0.0548156	0.200587	0.00654121	0.0192912	0.0640325	0.113099	0.0985176	0.0126235
973.502@1.4	0.182968	0.687303	0.25566	0.127817	0.0793545	0.0549479	0.107838	0.094761	0.267386	0.607828	0.0266304	0.209284	0.0574516	0.0478044	0.226304	0.0319086	0.14709	0.0378845	0.141718	0.0331776	0.0437891	0.238386	0.33144	0.765967	0.0354895	0.0772676	0.340685	0.332365	0.724189	0.0445465
974.53@3.5	0.423747	0.903985	0.532637	0.578246	0.243866	0.187531	0.309073	0.216998	0.656943	0.915891	0.0551693	0.390251	0.237957	0.122595	0.617871	0.0795035	0.407416	0.172386	0.365915	0.0538225	0.114354	0.466919	0.531674	1.10458	0.0685219	0.192816	0.709664	0.681583	0.634534	0.120073
975.46@1.4	0.0348332	0.161029	0.0533356	0.0342379	0.016388	0.00971228	0.0223282	0.0184035	0.0578018	0.153273	0.00502461	0.0372931	0.00941582	0.00622379	0.0526636	0.00451268	0.0291799	0.00641991	0.0213078	0.00654802	0.00645553	0.0678654	0.0497246	0.112924	0.00586369	0.0137582	0.0549733	0.0822837	0.177421	0.00794301
985.495@1.2	0.080906	0.280288	0.0659171	0.121192	0.0362645	0.0274814	0.0403274	0.0347212	0.113215	0.209147	0.00825487	0.0737968	0.0269506	0.013419	0.104021	0.00916325	0.0662407	0.0207148	0.0409655	0.0121776	0.0152171	0.155231	0.103759	0.226529	0.00801237	0.023575	0.0767427	0.126633	0.266178	0.0111523
986.259@6.1	0.263172	0.454359	0.185178	0.132481	0.170478	0.173291	0.128181	0.0991318	0.147257	0.0964744	0.104927	0.115571	0.134101	0.147538	0.341902	0.165101	0.118945	0.116356	0.2779	0.0411625	0.163157	0.0812803	0.121236	0.707924	0.122167	0.142253	0.336257	0.303459	0.166054	0.164265
989.293@2.2	0.0162584	0.0771238	0.0370868	0.0271599	0.0106163	0.0085893	0.0154482	0.00960607	0.0397847	0.059022	0.00575003	0.0234013	0.00742376	0.00611742	0.0234233	0.00539892	0.0249031	0.00908594	0.0125893	0.00419588	0.00847617	0.0188595	0.0193708	0.0696748	0.00705392	0.0132223	0.067641	0.0318306	0.0946301	0.0104002
990.343@6.1	0.28876	0.938847	0.131408	0.110541	0.3097	0.495048	0.137476	0.107113	0.412979	0.618193	0.231011	0.0736239	0.158752	0.333143	0.426068	0.560705	0.0886203	0.164164	0.529529	0.0481867	0.570354	0.0495675	0.0567269	1.42804	0.268435	0.869743	0.254566	0.497843	1.0698	0.313819
990.514@1.4	0.0812469	0.360721	0.140469	0.225321	0.0368889	0.037388	0.0614684	0.0458568	0.17925	0.279448	0.0123402	0.110373	0.0510249	0.015237	0.107038	0.0280261	0.0844984	0.0358509	0.0671246	0.0148254	0.0201167	0.0864858	0.243592	0.751592	0.0195349	0.047754	0.242377	0.196602	0.543945	0.0203938
991.496@2.8	0.0968334	0.333304	0.151683	0.10732	0.0524344	0.0379411	0.0591081	0.0507248	0.210324	0.288887	0.0204685	0.102822	0.0372668	0.0215009	0.128749	0.021328	0.0923827	0.0411891	0.0539709	0.0203795	0.0310328	0.104462	0.114635	0.328224	0.0248915	0.0486979	0.29082	0.178561	0.360615	0.033092
Acetoacetic acid	0.0315567	0.0273461	0.0291448	0.0132589	0.0144878	0.018452	0.0191243	0.0125669	0.0344086	0.030455	0.0145472	0.0245313	0.0161575	0.0209387	0.0402852	0.025347	0.0125921	0.0103769	0.0236027	0.0029355	0.0220839	0.00939501	0.0149449	0.0338077	0.016761	0.0321349	0.0577728	0.0229562	0.0633781	0.0234632
Alanine	0.0567335	0.0412577	0.305788	0.150614	0.0744396	0.0781537	0.0395242	0.0312072	0.0558934	0.00942628	0.0708493	0.0357863	0.053443	0.0444358	0.134587	0.0664456	0.209779	0.100145	0.1414	0.0407625	0.0797616	0.0305514	0.0633114	0.0240821	0.0929972	0.132923	0.121309	0.330781	0.0454225	0.0685162
Allantoin	0.0296677	0.0553753	0.0421387	0.0365137	0.0260242	0.0325772	0.0187767	0.0158092	0.0369178	0.0424621	0.0206971	0.0241225	0.0135181	0.0250043	0.037036	0.0369421	0.0204962	0.0171975	0.0428499	0.00646378	0.043254	0.0229588	0.0333993	0.100196	0.0250271	0.068314	0.0823241	0.0372764	0.0813583	0.0257869
Allose	0.094181	0.0629682	0.134023	0.211727	0.149072	0.143606	0.120082	0.000389204	0.00839778	0.0297097	0.210939	0.0560639	0.0912018	0.264776	0.0928132	0.457064	0.0372231	0.13198	0.282376	0.0186208	0.390937	0.0140219	0.0555137	0.331005	0.227015	0.37555	0.222303	0.140981	0.150035	0.227211
alpha-Tocopherol	0.00284545	0.0180786	0.00977822	0.0112003	0.00918206	0.00182037	0.00274191	0.00295815	0.00664525	0.00952747	0.000653921	0.00186848	0.00521398	0.00132673	0.0145171	0.000832773	0.0102241	0.00444783	0.00714875	0.00206714	0.00137893	0.0195557	0.00386663	0.00994514	0.00109713	0.00234889	0.0114171	0.031028	0.0111727	0.00161896
AMP	0.351517	0	0.488868	0.424733	0.486406	0.468278	0.0887996	0.131035	0	0	0.415049	0	0.109824	0.416175	0.0232495	0.490602	0.642645	0.993468	0.194556	0.0497264	0.836139	0.337409	0.143491	0	0.130086	1.25721	0	0.372151	0	0.231561
Arabinose	0.00127734	0.00433762	0.00291713	0.00248015	0.00123338	0.000838226	0.00131284	0.00113226	0.00277345	0.00475562	0.000415681	0.00318333	0.000742907	0.000729966	0.00198109	0.000714276	0.00203047	0.00105526	0.00232943	0.000435517	0.00139843	0.0016036	0.00176833	0.0100097	0.0011406	0.00161883	0.00635242	0.00249485	0.00700148	0.00133753
Arginine	4.11096	2.0375	5.13443	3.78779	3.90392	4.9987	2.97019	1.74312	3.904	2.52754	3.03073	2.30309	2.43749	3.91474	6.36612	5.11421	3.77204	3.29721	7.21366	1.26414	7.56616	2.68403	5.10897	0.640053	4.47767	13.2607	8.64302	0.109056	3.95518	4.26276
Asparagine	0.00399817	0.0057598	0.00408398	0.00536785	0.00309693	0.00182621	0.00326855	0.00154708	0.00395246	0.0054441	0.00146543	0.00452895	0.00318907	0.00179561	0.00388074	0.00417868	0.00373808	0.00169987	0.00717846	0.000710971	0.00312062	0.00124497	0.00249596	0.00736517	0.00303927	0.00476127	0.00618054	0.00402024	0.0114979	0.00400958
Asparangine	0.458799	0	0.70935	0.537443	0.604305	1.313	0.403882	0.198156	0.305371	0.105829	0.325919	0.003888	0.181438	0.406826	0.771741	0.66544	0.76173	0.636542	1.06188	0.234855	1.17611	0.149149	0.697158	0	1.17297	2.63838	0.843176	0.285372	0.0782708	0.566882
Aspartate	0.367513	0	0.589441	0.778913	0.644931	1.44009	0.294483	0.160142	0.0467209	0.0286348	0.806931	0.12769	0.329682	0.531826	0.594893	0.503355	0.96749	0.405555	0.962605	0.262917	1.00174	0.0389566	0.403788	0	1.49779	2.05	0.270244	0.697198	0.144463	0.580667
Aspartic acid	0.000758094	0.00129016	0.00831965	0.00968784	0.0059174	0.0184449	0.00242843	0.00157768	0.00137834	0.00246708	0.00305742	0.00068434	0.00125462	0.00106742	0.00417322	0.00259048	0.0148088	0.00734143	0.00934151	0.00443182	0.00857977	0.00199297	0.0037651	0.00141871	0.0270196	0.031464	0.00425691	0.00610767	0.00186497	0.00242996
C18-OH Sulfatide	0.0266373	0.0750302	0.082119	0.0659807	0.0166804	0.0136327	0.0463864	0.008841	0.0440736	0.0472391	0.00285397	0.0189141	0.0284906	0.00750287	0.0605835	0.00312436	0.0300925	0.0178837	0.0359949	0.00779068	0.0103825	0.0376698	0.00965931	0.0311666	0.00920667	0.0365623	0.0227898	0.0802821	0.023759	0.0116144
CDP-ethanolamine	0.0396794	0.162231	0.0458244	0.0424667	0.0234477	0.0810917	0.0217061	0.0228986	0.0853682	0.120567	0.0129828	0.0529475	0.00724445	0.0153943	0.0180448	0.0131201	0.0485269	0.024759	0.0616818	0.0155486	0.0263218	0.0422145	0.0708701	0.254377	0.0463675	0.0838498	0.153349	0.0327901	0.174046	0.0145277
Ceramide (d18:1/24:1(15Z))	0.0482552	0.223437	0.0582122	0.0457786	0.0238682	0.0181989	0.0329366	0.0206867	0.0807783	0.280476	0.0113457	0.0539804	0.0404618	0.0183222	0.0627262	0.0199954	0.0304038	0.0166026	0.0255207	0.00961984	0.0223647	0.0988687	0.12958	0.402995	0.0153027	0.0237256	0.105019	0.0917774	0.251687	0.0127923
Cholesterol	0.349715	1.19477	0.374338	0.601555	0.128509	0.0501672	0.218508	0.166387	0.741137	0.766758	0.0208845	0.41501	0.15393	0.043473	0.466915	0.0163855	0.324876	0.0588317	0.147479	0.0447833	0.0252946	0.631332	0.582313	2.05196	0.0228276	0.0746857	0.73625	0.823002	1.30291	0.0637659
Citric acid	0.0107691	0.01946	0.0764988	0.12437	0.0547662	0.0685031	0.0439165	0.0266845	0.01853	0.0325103	0.0492439	0.043544	0.0231113	0.0168247	0.0495008	0.037539	0.259872	0.130092	0.171487	0.0425799	0.0987483	0.105054	0.0907262	0.0470457	0.0812622	0.139217	0.229784	0.0572884	0.0586685	0.0287903
Creatine	0.883244	0.816555	1.57451	3.11938	0.888319	1.69064	0.856096	0.372333	1.15491	0.898811	0.530247	0.62874	0.454749	0.779133	1.65035	1.22172	4.02235	0.554423	2.29504	0.226242	1.04785	0.901806	0.570457	1.44536	0.9317	2.47534	3.20653	1.01931	2.87627	0.720979
Creatinine	0.647137	0.515292	0.815108	0.641112	0.59996	0.563171	0.464472	0.291332	0.58179	0.819679	0.309747	0.470859	0.335499	0.445912	0.895759	0.589059	0.535997	0.413813	0.893607	0.117936	0.62859	0.419011	0.290702	0.842525	0.234405	1.34054	1.24463	0.689436	1.22958	0.416677
Cysteine	0.0960457	0.0493758	0.214196	0.175103	0.142991	0.160813	0.164196	0.0469004	0.0819049	0.10916	0.0809398	0.0549524	0.0857713	0.159576	0.111993	0.145177	0.138109	0.0981301	0.245859	0.026156	0.260054	0.0787312	0.0552271	0	0.148684	0.208479	0.0468941	0.120518	0	0.0951261
Diaminopimelic acid	0.0493683	0.174367	0.0831641	0.0676867	0.026668	0.0345881	0.0246503	0.0307168	0.0566111	0.0945138	0.0226358	0.0411271	0.0408347	0.0386888	0.0515697	0.0504626	0.0511933	0.0585061	0.0534244	0.0117342	0.0493195	0.0153989	0.0616849	0.280549	0.0346511	0.0312181	0.195104	0.0764865	0.220069	0.033946
Dihydroxyacetone (glycerone)	0.560378	0.588034	0.481176	0.197623	0.189691	0.247191	0.301829	0.135975	0.429546	0.248747	0.221832	0.292603	0.210465	0.237776	0.544365	0.2067	0.179424	0.0925065	0.381028	0.042211	0.380665	0.0831876	0.0989569	0.0387814	0.28168	0.57261	0.518763	0.253846	0.763981	0.405162
Erythronic acid	0.00528589	0.00855452	0.0120886	0.00932207	0.00621249	0.00712006	0.00573878	0.00439642	0.00756718	0.00949501	0.00275218	0.00472118	0.0037201	0.00427323	0.0103296	0.00736329	0.0148088	0.00509483	0.0133883	0.00186512	0.00728861	0.00584059	0.00423891	0.010817	0.00762078	0.0136199	0.0122186	0.0107335	0.00858654	0.00738973
Etn-1-P-Cer(d14:1/18:0)	0.330552	0.602382	0.36536	0.44348	0.155374	0.0988778	0.151723	0.11671	0.373276	0.614593	0.0254888	0.346403	0.154805	0.0734467	0.408693	0.0636073	0.423162	0.170929	0.195824	0.0520149	0.0656912	0.248	0.370461	1.05867	0.0332102	0.106129	0.379906	0.38409	0.814099	0.0936443
Famotidine	0.442912	1.12753	0.884787	0.524427	0.286865	0.259932	0.385874	0.276116	0.869255	1.31122	0.20161	0.741097	0.291176	0.280334	0.571503	0.237989	0.488306	0.237503	0.574662	0.12892	0.317638	0.349412	0.728108	1.82341	0.274965	0.395477	1.99924	0.617197	1.3947	0.349259
Flavin adenine dinucleotide (FAD)	0.052297	0.1341	0.0854268	0.044021	0.0238937	0.0351245	0.0313818	0.029268	0.0453255	0.0424396	0.0206479	0.0255533	0.0368249	0.0414516	0.0456487	0.0415496	0.0337874	0.0264412	0.0792937	0.00907457	0.0391777	0.018047	0.0302004	0.208998	0.032434	0.0473539	0.0486272	0.0610529	0.167576	0.0271892
Fructose	0.0737947	0.0692835	0.0973854	0.0661145	0.0880528	0.0495487	0.0669218	0.0289083	0.0860596	0.0911359	0.0587053	0.0734089	0.059755	0.0876386	0.095128	0.144504	0.0757947	0.0582205	0.141537	0.0190005	0.111233	0.0362476	0.0365172	0.101195	0.0750272	0.113786	0.196281	0.122115	0.158059	0.0959636
Fructose/Mannose/myo-Inositol	0.20523	0.00137147	0.0688036	0.010925	0.0626474	0.0645486	0.0761242	0.0445143	0.0762193	0	0.060916	0.0630921	0.0888089	0.103518	0.192544	0.136925	0.0239848	0.0383879	0.12556	0.00756014	0.104044	0	0.118575	0.0886396	0.0642898	0.159108	0.335013	0.0405873	0.0445719	0.0906743
Fumaric acid	0.0127572	0.0113905	0.0429059	0.0243764	0.00935865	0.0361933	0.009852	0.00894935	0.00176206	0.0145102	0.0258778	0.00212262	0.00828579	0.00927158	0.0257148	0.0149438	0.0114957	0.0235406	0.0293426	0.00580917	0.0186465	0.00700876	0.0150827	0.0272399	0.0235131	0.0249168	0.0215617	0.00646288	0.0255632	0.00630099
Galabiosylceramide (d18:1/16:0)	0.509559	1.0656	0.105731	1.59162	0.127902	0.0965736	0.132809	0.116182	0.810169	0.624904	0.0444746	0.284495	0.170246	0.0281465	0.293936	0.0304911	0.617867	0.239586	0.187746	0.0513589	0.0281315	0.533504	0.367302	0.411444	0.0698581	0.0500397	0.239873	0.56592	1.19447	0.0685783
Ganglioside GM3 (d18:1/16:0)	0.0254315	0.059587	0.0147578	0.0552151	0.025949	0.0929837	0.0680725	0.0270451	0.074274	0.0616194	0.00595685	0.0553823	0.0500492	0.0227804	0.0205494	0.0261761	0.0519493	0.0292028	0.0734075	0.0226284	0.0119559	0.0645632	0.154797	0.187613	0.0143279	0.0226307	0.0603348	0.123347	0.129878	0.0187227
Glucose	1.14841	0.501509	0.715894	0.305884	0.333073	0.321883	0.396728	0.22804	0.625367	0.478679	0.26274	0.397654	0.349947	0.425223	0.798932	0.785646	0.312761	0.294866	0.819668	0.0606369	0.498751	0.155129	0.257463	0.479315	0.340327	0.651092	1.0622	0.346565	0.688442	0.461527
Glutamate	2.85275	0	13.8568	10.0992	7.46276	22.3119	3.42987	1.52403	0.555624	0	4.67075	0.760234	2.07707	3.69712	3.94457	4.9528	16.8421	4.97558	13.9851	2.70337	10.3922	6.34956	4.2974	0	20.1402	32.3905	5.19056	5.81304	0.687691	4.03785
Glutamic acid	0.000806423	0.000673189	0.0130971	0.0130008	0.00856625	0.159065	0.00282265	0.00101657	0.00080079	0.000462689	0.00280928	0.000613606	0.00130296	0.000719114	0.00537645	0.00336758	0.0332263	0.0133563	0.0144138	0.00700777	0.0173487	0.00271728	0.00431054	0.00044087	0.0757785	0.187154	0.000961578	0.0163733	0.000786384	0.00281413
Glutamine	9.9926	10.2934	23.7708	17.1596	13.2316	10.0942	13.3376	1.84803	10.8064	13.1714	9.66853	9.58276	10.2787	17.12	18.4905	17.4447	17.8134	16.6333	36.1543	5.3052	28.8991	10.8862	19.0776	14.8555	23.2654	53.402	34.1907	9.47422	20.1616	7.28213
Gly Gly Phe	0.0131161	0.180971	0.0681511	0.0826317	0.0358257	0.0589	0.044959	0.0124927	0.0592438	0.133157	0.0230549	0.0655398	0.0471742	0.0899663	0.0731626	0.0239082	0.0264986	0.107706	0.0952689	0.0153549	0.0921245	0.0627744	0.10748	0.348854	0.0280968	0.0515887	0.211448	0.0381967	0.255125	0.055215
Glyceric acid	0.00203781	0.00208437	0.00148608	0.00169565	0.00135053	0.00245978	0.00102988	0.000444687	0.00291095	0.00288165	0.00156789	0.00111206	0.00137438	0.000608348	0.000932838	0.00328068	0.000145927	0.00117502	0.00472839	0.000425509	0.00296994	0.00022269	0.00146472	0.00401612	0.00111432	0.00417021	0.00692312	0.00322341	0.00284723	0.00137076
Glycerylphosphorylethanolamine	0.0162974	0.0326717	0.0368281	0.0201369	0.0078821	0.0157669	0.0110198	0.00668728	0.0246503	0.0277745	0.00949248	0.013892	0.0160446	0.0138114	0.0150174	0.00719842	0.0109186	0.0336105	0.0130833	0.00544119	0.0117954	0.00750848	0.0129586	0.0437609	0.0117767	0.018772	0.0616956	0.0270518	0.0409598	0.0157008
Glycine	0.0166322	0.0505881	0.309165	0.218964	0.0873797	0.0883505	0.0536996	0.0253015	0.0651853	0.0480549	0.0343679	0.0353395	0.0301444	0.0435118	0.0617699	0.0952097	0.309269	0.0902562	0.25876	0.03932	0.0966871	0.0543756	0.0508548	0.0496891	0.138758	0.147677	0.128047	0.121572	0.0196713	0.0568422
GPEtn(13:0/20:0)[U]	1.69096	1.09641	0.959342	0.870139	0.583124	0.259148	0.35763	0.668902	2.91045	1.63647	0.0706329	1.1115	0.744744	0.233326	1.21972	0.206444	0.494753	0.308339	0.491747	0.28383	0.131672	0.723835	1.68745	2.6161	0.208314	0.1688	1.74283	1.35661	1.43127	0.158256
GPEtn(16:0/20:4(5Z,8Z,11Z,14Z))	0.296669	1.01358	0.3305	0.278964	0.102074	0.0711779	0.138413	0.102331	0.555237	0.971108	0.0304457	0.261052	0.0960755	0.0402703	0.327444	0.0273108	0.166436	0.0758574	0.100719	0.038093	0.0447962	0.289408	0.350081	1.01448	0.0284441	0.0661189	0.725584	0.413816	0.959103	0.0660118
GPEtn(16:0/22:4(7Z,10Z,13Z,16Z))	2.7005	12.1332	4.19196	9.40379	1.45712	0.749129	1.87194	1.31147	7.41682	10.0951	0.316349	3.22381	1.7113	0.424247	4.38869	0.680543	1.75385	0.648834	1.30022	0.478764	0.515311	2.66154	10.4234	13.3343	0.464774	0.727256	6.17588	7.59829	19.2782	0.502854
GPEtn(18:0/0:0)	0.0157334	0.0298527	0.0242166	0.0468298	0.00544357	0.0109044	0.0196487	0.00612245	0.0284089	0.0305048	0.0029003	0.0177708	0.0260362	0.00889453	0.0164208	0.00461741	0.0119048	0.00561203	0.0103368	0.00316751	0.0055806	0.0103613	0.0161786	0.0445023	0.00734467	0.00750765	0.0396204	0.0378564	0.0323904	0.00527466
GPEtn(18:0/18:1(11Z))	0.376018	0.745802	0.353494	0.219097	0.118025	0.10884	0.169211	0.102479	0.565206	0.758354	0.0614894	0.21627	0.103072	0.0842512	0.412547	0.0845354	0.151227	0.091414	0.209871	0.0568857	0.104095	0.312513	0.596596	1.66195	0.0899555	0.149437	0.798159	0.489681	1.3594	0.11822
GPEtn(18:0/22:6(4Z,7Z,10Z,13Z,16Z,19Z))	0.378474	1.38012	0.465955	0.634819	0.26613	0.158519	0.256432	0.177322	0.782436	1.32509	0.0863678	0.430403	0.147422	0.124972	0.718564	0.0777314	0.474355	0.159225	0.206156	0.0897362	0.145053	0.444907	1.56809	5.82722	0.0597529	0.0956618	1.04711	0.872601	2.55717	0.0805201
GPEtn(18:1(11Z)/18:1(9Z))[U]	1.00702	3.8538	0.947817	1.33546	0.406495	0.273133	0.484035	0.368323	2.82875	3.33501	0.131785	0.934332	0.536969	0.221037	1.35454	0.133292	0.689758	0.36549	0.63847	0.137359	0.210549	1.30951	2.44486	6.76474	0.152649	0.256312	2.73974	2.08503	4.391	0.242843
GPEtn(19:0/16:0)[U]	4.57817	10.4088	9.56578	7.39006	4.37824	1.91273	3.18757	3.52744	10.061	19.9619	0.347193	6.78685	2.34409	1.18961	8.62551	0.635548	6.83268	1.76129	6.21963	1.67454	1.11662	12.9652	18.0005	42.3014	0.558601	1.70844	10.5859	10.8261	15.2573	0.777919
GPEtn(O-16:0/22:5(4Z,7Z,10Z,13Z,16Z))	1.72244	10.7766	2.61931	2.41071	1.16936	0.847975	0.971781	1.13068	4.71701	9.40791	0.285511	1.72168	0.680049	0.494907	4.08325	0.563489	1.78534	0.451612	1.56215	0.314861	0.582906	5.68235	6.06169	25.3307	0.369704	0.686139	2.90583	4.97963	13.4969	0.377657
GPGro(18:0/18:0)[U]	0.158298	0.872185	0.251635	0.234926	0.0921464	0.0732118	0.0849389	0.0926462	0.391231	0.522922	0.0261857	0.201554	0.0923787	0.0611715	0.299709	0.0628577	0.183335	0.0784868	0.139768	0.042276	0.0916382	0.407724	0.440069	2.82459	0.0375482	0.0715273	0.605251	0.439667	1.15844	0.0363752
GPGro(18:0/18:1(11Z))	0.446452	1.01303	0.696396	0.289639	0.223688	0.0577341	0.275662	0.205096	0.318709	1.04968	0.0411991	0.271313	0.118155	0.0560661	0.750671	0.0498767	0.153053	0.0772925	0.180908	0.0578883	0.0588709	0.181545	0.504298	1.30641	0.0282551	0.0724254	0.769114	0.469088	0.820516	0.0875392
GPGro(18:0/20:4(5Z,8Z,11Z,14Z))	0.0396502	0.128127	0.077742	0.0776947	0.0188349	0.0136862	0.0702728	0.0223162	0.0517056	0.0607994	0.00648283	0.0369814	0.0269702	0.00983371	0.0773367	0.0101614	0.0346679	0.0211075	0.0568129	0.0081948	0.0121253	0.0354769	0.0615536	0.196476	0.00849336	0.0387463	0.0940062	0.0743277	0.0775225	0.0179065
GPGro(18:0/22:6(4Z,7Z,10Z,13Z,16Z,19Z))	0.0556166	0.151291	0.174571	0.135256	0.0379851	0.033574	0.0980241	0.0210339	0.102845	0.107803	0.00677617	0.0467841	0.0705456	0.0157981	0.142703	0.0074815	0.0672925	0.0363775	0.0719865	0.0179968	0.0209506	0.0869128	0.0338456	0.0665439	0.0203305	0.0786799	0.0609201	0.190703	0.0539455	0.027912
GPGro(18:1(9E)/0:0)[U]	0.0126949	0.0344158	0.0436025	0.0167612	0.0068414	0.012738	0.0145835	0.00887579	0.01538	0.0199823	0.0112964	0.00974118	0.00934857	0.0265502	0.0269514	0.0227563	0.0129417	0.0146496	0.0408665	0.00263992	0.0280323	0.0165076	0.0238904	0.0838228	0.0193348	0.030578	0.0550885	0.0217176	0.0481526	0.0184122
GPGro(18:1(9E)/18:1(9E))[U]	0.183668	0.483021	0.319326	0.251029	0.074342	0.0652601	0.201658	0.0931868	0.320267	0.427079	0.0170227	0.146927	0.0954932	0.0672457	0.40975	0.0207114	0.176524	0.0826383	0.166559	0.0371179	0.0479624	0.226006	0.0572569	0.241593	0.026795	0.11509	0.0853435	0.433245	0.173795	0.0593849
GPIns(16:0/18:1(9Z))	0.135707	0.666184	0.0978882	0.167267	0.0515201	0.0400383	0.094559	0.041693	0.325406	0.304058	0.00723309	0.111974	0.038047	0.00965519	0.294846	0.0180307	0.162253	0.0177857	0.125009	0.0242117	0.0147985	0.276757	0.226721	0.693198	0.0126499	0.0339925	0.155464	0.238403	0.580173	0.0252859
GPnEtn(16:0/18:1(9Z))	0.0452477	0.206186	0.0605811	0.0387086	0.0200255	0.0114614	0.0131075	0.0190464	0.066915	0.135797	0.00622576	0.066421	0.0128162	0.00793131	0.0568164	0.00337918	0.0454947	0.013365	0.0165091	0.006983	0.00851351	0.0701059	0.0506947	0.122841	0.00478471	0.0140772	0.110521	0.074354	0.262774	0.0133971
GPSer(18:0/18:1(9Z))[U]	0.653292	1.90115	0.397749	0.815894	0.270283	0.172457	0.255703	0.243221	0.835914	1.59226	0.0474907	0.484484	0.191018	0.0851531	0.849284	0.0544658	0.462472	0.127332	0.21076	0.0776018	0.0880055	1.58088	1.11559	1.82901	0.0505301	0.136894	0.680023	0.910225	1.80133	0.0657716
GPSer(18:0/20:4(5Z,8Z,11Z,14Z))	0.314386	1.10279	0.23655	0.944091	0.160891	0.110748	0.211139	0.118728	0.490586	0.785	0.0219373	0.361397	0.104481	0.0298713	0.573285	0.0463142	0.258543	0.0613157	0.235882	0.053325	0.0525455	0.566119	0.460679	1.67545	0.0361759	0.0943848	0.377454	0.57752	1.34954	0.0367465
GPSer(18:0/22:6(4Z,7Z,10Z,13Z,16Z,19Z))	0.80543	2.38139	0.58172	1.11383	0.41079	0.256287	0.624353	0.34172	2.1642	1.87708	0.114184	0.688094	0.305341	0.0757601	2.10462	0.0887979	1.02111	0.135543	0.763892	0.140661	0.0862392	0.987288	2.47627	3.05766	0.0713153	0.22522	1.22444	1.29706	4.18587	0.118433
GPSer(18:1(9Z)/18:1(9Z))	0.157367	0.369125	0.0654137	0.336056	0.0616531	0.0755345	0.106025	0.0372008	0.311216	0.252471	0.00557747	0.117831	0.0523031	0.0140598	0.23853	0.0103411	0.193932	0.033663	0.0776477	0.0187108	0.0208961	0.21547	0.145101	0.376276	0.0138381	0.040706	0.120654	0.218021	0.320372	0.0208511
Guanosine	0.0635603	0.0831891	0.0793949	0.10529	0.0342607	0.160862	0.0491946	0.011782	0.0611643	0.149237	0.00844359	0.0478603	0.0302359	0.0249196	0.0988507	0.0595339	0.0271852	0.036751	0.136718	0.0685488	0.0439589	0.0248017	0.0690345	0.339352	0.234256	0.146354	0.193973	0.0285262	0.252362	0.0165282
Histidine	0.124718	0	0.335571	0.356918	0.370785	0.608021	0.287956	0.123199	0.529142	0	0.300514	0.132611	0.315455	0.461562	0.603919	0.544194	0.355948	0.734748	0.718362	0.104637	0.711235	0.0109167	0.392325	0	0.623241	1.05336	0.423619	0.209343	0	0.615579
Hypoxanthine	0.233005	0.680059	0.971013	1.75211	0.770467	1.27106	0.309054	0.295658	0.632127	0.264292	0.345879	0.323805	0.595587	0.460929	1.30139	0.919208	0.625448	0.653546	1.27936	0.31855	0.711807	0.49039	0.489645	2.68846	1.39274	4.92066	0.75946	0.772446	0.511267	0.339656
Indoleacrylic acid	0.578064	0.481961	0.756207	0.652634	0.475743	0.584892	0.413927	0.249053	0.515254	0.584648	0.275268	0.413072	0.35132	0.4352	0.767886	0.494675	0.638396	0.435939	0.974515	0.173526	0.552686	0.349338	0.992851	0.893792	0.607393	1.14588	0.973659	0.761605	0.66657	0.460976
Inosine	0.0263721	0.223274	0.655388	0.509797	0.166964	0.786047	0.18001	0.0641909	0.218946	0.534717	0.136264	0.119251	0.163111	0.141324	0.274076	0.358474	0.101735	0.268644	0.433942	0.061401	0.284123	0.0941757	0.307313	0.18519	1.37765	1.29837	0.429156	0.0776827	0.196126	0.161543
Isocitric acid	0.000675015	0.00198591	0.00226369	0.00219459	0.00119901	0.00107355	0.00101986	0.000544027	0.00136921	0.00217469	0.000720927	0.00177621	0.000536862	0.000460003	0.00156228	0.000608945	0.0040179	0.00194816	0.00257902	0.000725065	0.00109222	0.00216717	0.00172602	0.00316436	0.00132838	0.00271128	0.00429253	0.00155913	0.00313428	0.000659689
Isoleucine	0.0390215	0.0182093	0.0735377	0.0800336	0.0425385	0.0638644	0.0353681	0.0220379	0.0249309	0.0147388	0.0193244	0.00906203	0.0278965	0.0184298	0.0628809	0.0373515	0.0813674	0.0488202	0.0925819	0.0247468	0.0538345	0.0243088	0.0426602	0.011734	0.0516487	0.100145	0.0261879	0.0373376	0.0219303	0.0270377
Isoleucine/Leucine	13.5883	7.5729	17.73	14.8885	11.8841	22.4342	9.59878	6.57356	13.8102	10.9871	8.27106	7.52986	9.08739	12.3311	21.3186	15.3081	14.6055	10.7713	24.4227	4.20424	21.8581	8.74985	21.0213	8.73443	17.6989	38.7131	28.69	12.2437	17.5555	12.2253
L-2-Aminoadipic acid	0.0309452	0.617564	0.520596	0.345684	0.432464	0.47419	0.176062	0.138725	0.242859	0.283609	0.0913351	0.0339173	0.0614996	0.446213	0.165044	0.648462	0.251938	0.126359	1.1834	0.0774583	2.24176	0.357897	0.0729981	1.36093	0.111201	0.629794	0.113565	0.110685	0.825073	0.0266297
Lactic acid	0.00362924	0.0110983	0.0250116	0.0544766	0.0359894	0.0479532	0.00728155	0.0172662	0.0121976	0.0129129	0.0256234	0.00464748	0.018207	0.0217489	0.0300971	0.0571719	0.0283146	0.0448446	0.0890622	0.00939567	0.0581427	0.0118203	0.00972694	0.0113571	0.0277377	0.134419	0.0358762	0.0211225	0.0153709	0.0217297
Leucine	0.0370297	0.022335	0.0624014	0.0581695	0.0474611	0.0932435	0.0338738	0.0264163	0.0328465	0.030652	0.0304321	0.0191976	0.0307395	0.0422459	0.0744725	0.0431148	0.0565894	0.0479919	0.0733185	0.0159846	0.0789256	0.0384701	0.051343	0.00656323	0.0734557	0.155138	0.0884338	0.0583162	0.0372046	0.0404301
Lysine	0.291403	0	0.419044	0.445044	0.366919	0.62492	0.31604	0.11466	0.333992	0	0.253492	0.124984	0.277852	0.38555	0.539447	0.416022	0.406516	0.688432	0.638902	0.136073	0.736603	0.156791	0.760717	0	0.497261	1.22433	0.25534	0.0960372	0	0.427958
Mannitol	0.047149	0.00358152	0.0537995	0.0640917	0.0546473	0.0871045	0.0299829	0.0203287	0.0401948	0.043013	0.0492935	0.0162392	0.0329959	0.0533191	0.0642692	0.0894749	0.0477067	0.0356692	0.0740774	0.0108554	0.100495	0.0130138	0.0303244	0.0427101	0.07087	0.185022	0.0950892	0.0701529	0.0297231	0.0510667
Mannose	0.00731613	0.0131077	0.00912478	0.0132071	0.00404123	0.00369909	0.00505748	0.00240732	0.00565941	0.0076447	0.00152003	0.00685878	0.00383681	0.00350064	0.0102725	0.0110729	0.0150384	0.00250444	0.018481	0.000826856	0.00551375	0.00268975	0.00318976	0.00820151	0.00824323	0.00907815	0.00821103	0.00886514	0.0166571	0.00782851
Methionine	1.55615	0.966307	1.99111	1.68939	1.35479	1.35546	0.703309	0.250577	1.82446	1.27361	0.781378	0.752306	1.25566	1.56993	2.09681	1.6799	1.83694	1.46114	1.35081	0.400686	1.38821	1.03203	1.65602	0.864092	2.19281	4.04414	2.47907	2.17861	1.48592	1.35589
Methionine sulfoxide	0.148022	0.791581	0.153295	0.53125	0.053021	0.396413	0.672505	0.177824	0.207413	0.486759	0.0700351	0.168045	0.0641463	0.0386174	0.27558	0.0777808	0.0806427	0.139107	0.45969	0.0550445	0.388585	0.0956305	0.290814	1.00489	0.123397	0.229494	0.566685	0.156967	0.3704	0.201303
myo-Inositol	0.520024	0.343586	4.8402	1.64825	1.29586	2.23787	0.506088	0.526655	1.28864	0.860678	1.27981	0.269229	0.599016	0.992685	0.712607	1.01307	0.760609	3.32003	1.02668	1.35626	1.47214	1.39192	0.576276	0.337147	3.9997	5.78326	1.52947	1.26766	1.62191	0.948718
myo-Inositol-1-phosphate	0.00538366	0.187169	0.0272474	0.0426371	0.0091343	0.00349576	0.00899206	0.0111594	0.00830856	0.0678729	0.000449789	0.00959298	0.00915257	0.00181871	0.0348365	0.00186138	0.0271859	0.00568079	0.0161026	0.00379058	0.00215945	0.0411512	0.0430478	0.122053	0.00182377	0.00088521	0.00973246	0.0513969	0.0793677	0.0013034
n-9,12-(Z,Z)-Octadecadienoic acid methyl ester	0.0056182	0.00426651	0.0542469	0.0198996	0.0137545	0.0251623	0.00661652	0.00550828	0.0149518	0.00917039	0.0139098	0.00330636	0.00713968	0.0109939	0.00973751	0.011486	0.00957838	0.0363633	0.0134893	0.0137684	0.0162058	0.0156108	0.00591417	0.00636487	0.0422472	0.0601586	0.0203406	0.0176916	0.0180207	0.0116263
N-Acetyl-a-neuraminic acid	0.0122105	0.015719	0.0477189	0.0331049	0.0188586	0.167334	0.0228994	0.0080532	0.0183833	0.0189749	0.0124809	0.0101188	0.00741405	0.0217278	0.0216331	0.0309282	0.0162682	0.011001	0.0305782	0.00612853	0.0264411	0.018203	0.0137996	0.0244972	0.0351894	0.0502442	0.0472285	0.0528628	0.0337978	0.0241125
N-Acetylgalactosamine 4-sulphate	0.0378989	0.0589851	0.130311	0.275464	0.0216579	0.0361597	0.161756	0.0085264	0.0736792	0.0628414	0.060114	0.023842	0.0200803	0.0121949	0.0722764	0.0178656	0.0248831	0.0674604	0.197225	0.00409583	0.0352094	0.0148867	0.0111836	0.0304085	0.0348112	0.17548	0.0293083	0.157044	0.0229771	0.0460319
N-Acetyl-L-Histidine	0.112538	0.605695	0.17693	0.127184	0.104557	0.12138	0.0706098	0.0603083	0.320825	0.499641	0.0748739	0.194189	0.0641978	0.117375	0.146474	0.140148	0.174051	0.0818177	0.192463	0.0248657	0.168721	0.198607	0.286051	0.966543	0.0958183	0.220406	0.294345	0.30031	0.721724	0.122859
NAD	0.00842085	0	0.0468312	0.01902	0.0217455	0.0261135	0.00736532	0.00955824	0.00326726	0.0212738	0.0231664	0.00422727	0.00664868	0.00998422	0.00960043	0.00864591	0.0199294	0.0454665	0.0191942	0.00649773	0.017061	0.0161901	0.0100389	0	0.0272426	0.0372058	0.0387413	0.0272702	0.019334	0.0393305
NADH	0	0	0	0.00833137	0.00476199	0.0402327	0	0	0	0	0.00799656	0	0	0.00282718	0	0.00680279	0.00923534	0.0157071	0.0119441	0.000883184	0.0243202	0.00357166	0	0	0.0246763	0.0621016	0	0	0	0.00545181
Nervonic acid	0.0105628	0.0200258	0.0109747	0.0134755	0.00446701	0.00446571	0.00661288	0.00429429	0.0165245	0.0167148	0.00194648	0.0073161	0.00903289	0.00422833	0.0090317	0.00260117	0.0106866	0.0146375	0.00708897	0.00181416	0.00377402	0.00538242	0.0116925	0.0357911	0.00270752	0.00560386	0.0293214	0.013809	0.0145299	0.00350912
N-Palmitoylsphingosine	0.0685083	0.149335	0.0758579	0.0813193	0.0309203	0.0131059	0.0623466	0.0222342	0.0990064	0.196629	0.0041912	0.0631054	0.0237449	0.00620513	0.0637187	0.00764105	0.0557584	0.0133899	0.0127445	0.0166162	0.00893605	0.0707319	0.041506	0.145715	0.00824248	0.0100195	0.110396	0.052603	0.12535	0.0135509
Panthenol	0.00141863	0.00206423	0.00193697	0.00153226	0.000972255	0.00090824	0.00104075	0.000658615	0.00134183	0.00186654	0.000707277	0.00146095	0.000519355	0.00131429	0.00152661	0.00207041	0.00104752	0.000716237	0.00260873	0.000341391	0.00160712	0.000583002	0.000769941	0.00305579	0.00108148	0.00141251	0.00436378	0.00206166	0.00333979	0.00139312
Pantothenic Acid	0.0623243	0.085186	0.0993361	0.0411608	0.031936	0.131342	0.0314069	0.0373293	0.0641867	0.0593832	0.025061	0.0331302	0.0327726	0.0293018	0.0811935	0.0447098	0.0409651	0.0316209	0.0581937	0.0105237	0.0504728	0.0437438	0.0483781	0.10764	0.040894	0.120796	0.0976981	0.0689359	0.130184	0.033583
Phenylalanine	1.83775	0	2.28338	2.14736	1.93161	3.57002	1.34555	0.810739	1.37133	0.843461	1.29208	0.61514	1.61212	1.97166	2.91548	2.48037	2.71103	2.36648	3.85047	0.679826	3.71387	1.12399	4.41668	0	2.75959	6.43782	3.09767	2.74399	0.551858	2.07123
Phosphatidyl glycerol	0.0364812	0.0512273	0.0916992	0.0737634	0.0235231	0.0933852	0.037023	0.0213378	0.0355127	0.0398906	0.0263349	0.0201078	0.0279937	0.0334951	0.0443393	0.038498	0.0354807	0.0314467	0.0868522	0.0125581	0.0518434	0.0351165	0.0299251	0.0328498	0.0615824	0.112137	0.0603523	0.0545349	0.0676871	0.0281395
Phosphoenolpyruvate	0	0	0	0	0.00114952	0.00307023	0	0.00051375	0	0	0.000891598	0	0.000647215	0.000975886	0	0.00341903	0.00032511	0.000749354	0.00275863	0.000171762	0.0019196	0	0.00216633	0	0.00117212	0.00430352	0	3.6676e-05	0	0
Phosphoric acid	1.62773	3.19584	4.1428	4.99601	1.20232	0.989021	1.39042	0.990762	0.605894	1.34517	0.449532	0.606163	0.96129	0.512495	1.86566	0.873604	2.79044	1.24349	3.10089	0.541796	0.831749	1.99116	0.609867	0.688439	0.688845	1.49229	0.574533	2.63688	1.53233	1.15156
Proline	2.919	0.185003	5.23169	4.6287	3.43842	4.36006	2.15352	1.36232	3.33338	1.73196	2.09552	1.50999	1.88027	2.88488	5.0604	4.94024	4.03774	4.03026	5.57116	1.20174	6.21224	1.80507	5.48955	0.129949	5.31998	9.27527	6.95486	3.85195	3.58338	2.92981
Purine	7.48711	31.8226	23.9941	10.3024	7.80569	4.46676	5.96088	4.6514	19.7012	22.0739	4.24272	11.7752	8.12047	5.01219	22.5683	4.12701	6.97958	4.74272	6.90594	1.84504	3.79062	7.44252	17.602	50.8296	4.58721	8.16121	26.7351	21.8354	42.273	6.74945
Pyroglutamic acid	0.149347	0.0484054	0.402955	0.30303	0.147579	0.442722	0.0696892	0.122971	0.110334	0.0303024	0.0467115	0.0908845	0.0680729	0.0571543	0.171826	0.237297	0.487794	0.168987	0.29086	0.0664795	0.195644	0.128412	0.0624663	0.0455258	0.346386	0.560837	0.213801	0.0582434	0.205417	0.176682
Resolvin D1	0.103485	0.311595	0.164319	0.126444	0.0605172	0.0519302	0.0734706	0.044606	0.168037	0.239886	0.0149757	0.129219	0.0535023	0.0283043	0.312051	0.0315622	0.0634751	0.042484	0.0883171	0.0400036	0.0321374	0.129542	0.293287	0.499938	0.0187416	0.060371	0.324297	0.173633	0.393643	0.0463999
Ribose	0.00135003	0.00484844	0.00345388	0.0032128	0.00509735	0.00133416	0.00147545	0.00144847	0.00280269	0.00445214	0.000558377	0.00175327	0.00285354	0.00130897	0.00296762	0.00151249	0.00310669	0.00323262	0.00336342	0.00157384	0.00261937	0.00111176	0.00274979	0.00597478	0.00278716	0.00230128	0.00602934	0.00391715	0.00465204	0.00133148
S-Adenosylhomocysteine	0.0773768	0.219265	0.111726	0.0564596	0.060497	0.070494	0.0546877	0.0388885	0.0758278	0.0562818	0.0328833	0.0295833	0.109226	0.0820401	0.0802834	0.0972275	0.0462704	0.0497857	0.119811	0.0120394	0.0816738	0.0288927	0.0653945	0.393826	0.0781519	0.105936	0.260707	0.0797344	0.310671	0.0620295
Serine	0.00608573	0.00669778	0.0161987	0.0224146	0.0170398	0.0263667	0.00315255	0.00201178	0.0055723	0.00764528	0.00444836	0.00389399	0.00545559	0.00197237	0.00881126	0.0103459	0.0160774	0.0161039	0.0219296	0.00587251	0.0183756	0.00169491	0.00796973	0.00933628	0.0198816	0.0450942	0.0167886	0.0105689	0.00680249	0.0020249
SM(d18:1/18:0)	0.321479	1.47499	0.255319	0.261538	0.156491	0.0873409	0.164022	0.182584	0.750838	0.737613	0.0312521	0.262757	0.142906	0.047029	0.560797	0.0669552	0.212677	0.0766235	0.282982	0.0428428	0.0511344	0.31731	0.500775	0.874236	0.0264306	0.0884105	0.496812	0.419956	0.552205	0.0857708
SM(d18:1/22:0)	0.0488821	0.253592	0.072756	0.0904737	0.0292604	0.0205419	0.0238589	0.0387769	0.17276	0.258724	0.0094338	0.0593058	0.0270346	0.0107121	0.168728	0.0100104	0.0408696	0.0226205	0.0664089	0.0100476	0.0191008	0.164606	0.170921	0.578038	0.00812423	0.0209087	0.123203	0.133856	0.350782	0.0112049
SM(d18:1/24:1(15Z))	0.264289	1.99377	0.498622	0.650481	0.179993	0.0795333	0.168853	0.159282	1.00394	1.63285	0.0403722	0.347328	0.159369	0.0798718	0.935938	0.0504917	0.272827	0.0778235	0.275101	0.0536318	0.106172	1.50579	1.1749	4.04154	0.0438466	0.143168	0.816405	1.06898	2.32581	0.0591739
Sorbitol	0.0324953	0.022876	0.037204	0.0297092	0.0321384	0.0410796	0.0214924	0.0170375	0.036541	0.0286913	0.0214733	0.0202388	0.025514	0.0270495	0.0500916	0.0450823	0.0266856	0.0196574	0.048553	0.00701282	0.0499566	0.0176161	0.0145156	0.0226546	0.0286552	0.0697465	0.0695943	0.0525363	0.0318384	0.0245275
Taurine	0.100839	0.0578585	0.610965	0.701741	0.305222	0.626577	0.214171	0.0657488	0.156357	0.0706824	0.157039	0.0208428	0.0600382	0.356406	0.265926	0.103883	1.23152	0.457605	1.09349	0.107108	0.341896	0.695648	0.240257	0.0415913	0.729391	1.2674	0.529182	0.270959	0.497669	0.212359
Threitol	0.0193325	0.0123748	0.0284127	0.0170574	0.0220889	0.0165993	0.0145159	0.010743	0.0118531	0.00928782	0.0106231	0.00881267	0.00836416	0.0160207	0.0255727	0.0400822	0.0220596	0.0185336	0.0304508	0.00606764	0.0321223	0.00403082	0.00805044	0.0117675	0.0218098	0.0531102	0.0289493	0.0147234	0.018757	0.0212601
Threonic acid	0.0044551	0.00717245	0.0412249	0.0390183	0.0121889	0.013964	0.00465623	0.00408701	0.00402549	0.00863478	0.00754057	0.00726631	0.000910331	0.00548629	0.00880299	0.00244401	0.0246383	0.0190949	0.0252256	0.0074511	0.00736272	0.0256576	0.00803785	0.015176	0.023111	0.0481364	0.0193431	0.014947	0.0308821	0.00828243
Threonine	0.00411759	0.0119091	0.0159159	0.0130588	0.00613173	0.0119705	0.00609824	0.00330837	0.00838608	0.0118159	0.00338625	0.00594437	0.00592007	0.00233199	0.0131617	0.00627213	0.0139622	0.00989123	0.0111718	0.00414054	0.00920779	0.00485692	0.00527114	0.0158211	0.0109365	0.0135855	0.0199938	0.016867	0.0137657	0.00488412
Threonine/Homoserine	0.484351	0	1.56861	1.29862	0.962401	2.21638	0.648101	0.342032	0.3305	0	0.770312	0	0.968271	1.02179	1.57808	1.46223	1.06134	1.0616	1.86641	0.409222	1.88444	0.139856	0.866123	0	1.83717	2.96313	0	0.557283	0	1.054
Trans-4-Hydroxy-L-proline	0.700611	0.496508	0.832265	0.586235	0.58709	1.00019	0.441997	0.357163	0.665892	0.758775	0.402431	0.468123	0.409443	0.542482	1.07643	0.688063	0.570424	0.512725	1.0296	0.164749	0.859921	0.456967	0.54218	0.709168	0.74308	1.90893	1.51686	0.344044	1.17664	0.536759
Tryptophan	0.613409	0.254269	0.792603	0.881557	0.571555	0.80317	0.482753	0.257058	0.394759	0.630522	0.372766	0.413052	0.443266	0.554823	0.858057	0.737422	0.782852	0.555455	1.22565	0.198062	0.847349	0.389448	1.02286	0.322564	0.856334	1.65588	1.05687	0.872999	0.314415	0.651247
Tyrosine	1.53385	1.12135	2.2429	1.87676	1.44998	2.32655	1.07892	0.711831	1.72248	1.02875	1.00358	0.741551	1.24347	1.61739	2.30289	1.97382	1.81039	1.38013	2.71096	0.538392	2.68819	1.02354	2.77452	0.553053	2.18451	4.44657	2.71805	2.21588	1.52692	1.71356
UDP-glucose	0.00664902	0.0280382	0.0184157	0.00839366	0.00353582	0.00931727	0.00659539	0.00302479	0.00937627	0.0115779	0.00603354	0.00589695	0.00273942	0.0019941	0.0107515	0.00140963	0.00503807	0.00730423	0.0190701	0.00260647	0.00767438	0.00635477	0.00839182	0.0345355	0.00743296	0.0152535	0.0224131	0.00794882	0.0317373	0.00343406
UDP-N-acetyl-D-galactosamine	0.0178646	0.169725	0.154227	0.0877631	0.0582293	0.0858062	0.0298898	0.0171683	0.0998564	0.0352742	0.0249884	0.069456	0.0156783	0.0256779	0.0432107	0.0169337	0.0904438	0.0493422	0.240147	0.0263322	0.0582932	0.111975	0.0438457	0.298408	0.0688724	0.0989512	0.115787	0.0901693	0.0741744	0.0398011
Valine	0.0458766	0.0468167	0.109513	0.120024	0.0532103	0.0716026	0.0516868	0.0250375	0.0316657	0.0338547	0.0281406	0.0248044	0.0450809	0.0340863	0.0828651	0.0483893	0.114622	0.0623957	0.121999	0.0327767	0.0670111	0.0316673	0.0694886	0.00838933	0.0666129	0.102298	0.0920172	0.135531	0.0536731	0.0482951
Xanthine	0.0377496	0.0892692	0.0509183	0.0457805	0.0237817	0.0413679	0.0224144	0.0167681	0.0466603	0.0566212	0.0203156	0.022273	0.015582	0.02159	0.0455895	0.0330728	0.0278136	0.0211655	0.0462898	0.00518225	0.0392725	0.0335482	0.0466299	0.181464	0.0279075	0.0915348	0.0927721	0.0399834	0.163447	0.0238813

## Sheet: Means
Metabolite	Non-responder	Non-responder.sd	Responder	Responder.sd
1,2-di-(9Z-octadecenoyl)-sn-glycero-3-phospho-(1'-myo-inositol)	0.156711	0.14023	0.161495	0.150079
739.554@2.7	0.520253	0.541029	0.58861	0.633756
773.536@1.3	1.74426	2.64463	1.029	0.998763
1-Aminocyclopropane-1-carboxylic acid	0.0681463	0.0674656	0.0444865	0.0317077
1-heneicosanoyl-2-(4Z,7Z,10Z,13Z,16Z,19Z-docosahexaenoyl)-sn-glycero-3-phosphoethanolamine	4.31749	4.434	4.34562	3.071
753.533@2.8	1.25087	1.33949	1.21678	0.755847
815.559@1.2	0.0276866	0.0375258	0.0317954	0.0313959
1-octadecanoyl-2-(9Z-octadecenoyl)-sn-glycero-3-phosphoserine	1.10195	1.37897	1.03933	0.884327
1003.489@1.4	0.0503072	0.0663255	0.0458855	0.0531728
1005.525@2.9	0.182109	0.242362	0.121692	0.0980792
1007.481@1.2	0.0510816	0.0627229	0.055733	0.0485963
1008.239@6.1	0.153741	0.131218	0.143815	0.0784713
1014.524@3.5	0.0725396	0.0539082	0.0880994	0.0588114
1019.483@1.4	0.0663149	0.0954206	0.0580838	0.0577497
102.047@3.7	0.38157	0.374257	0.293249	0.219077
1029.525@2.8	0.810878	0.863796	0.686968	0.514843
1030.361@0.7	0.0707946	0.085406	0.0547175	0.0487673
1031.48@1.2	0.0591222	0.0705447	0.0593175	0.0564476
1031.541@2.8	0.790684	0.851429	0.68134	0.516729
1032.544@2.8	0.160904	0.186297	0.134144	0.102339
1039.509@1.4	0.269812	0.365161	0.202773	0.173829
1051.507@2.7	0.451952	0.48376	0.422942	0.307397
1051.511@2.8	0.0888493	0.0977838	0.0817532	0.0713414
1053.524@2.7	0.676187	0.736783	0.594281	0.466591
1053.523@2.8	0.0844146	0.09171	0.0806022	0.0712443
1055.539@2.7	0.338575	0.32682	0.317963	0.25612
1056.9@2.1	0.0477482	0.0461353	0.0410667	0.0329347
1056.9@1.9	0.0235308	0.0427212	0.017851	0.0400765
1057.554@2.7	0.407425	0.410215	0.365303	0.306181
1061.514@1.2	0.180994	0.210099	0.184248	0.143729
1066.789@0.7	0.580905	0.769897	0.493785	0.477567
1069.512@2.8	0.172632	0.178997	0.160188	0.13832
1071.53@2.8	0.142038	0.154738	0.146344	0.128777
1079.54@2.6	0.608011	0.70868	0.548563	0.433067
1104.099@1.9	0.382952	0.359794	0.338643	0.205927
1109.525@1.1	0.269669	0.336184	0.245233	0.206606
113.995@2.6	0.0182027	0.0224718	0.00889997	0.00773108
1138.491@1.1	0.0134503	0.0136675	0.0213947	0.0200109
115.065@5.4	0.0178615	0.00798853	0.0125925	0.00569183
1159.097@6.1	0.0350879	0.0221116	0.0289846	0.0131677
118.027@2.6	0.144848	0.123113	0.125089	0.0864317
1180.501@0.8	0.0818051	0.0982013	0.0659088	0.0490234
1187.091@1.9	1.33314	1.12506	1.15488	0.695331
1197.075@1.9	0.563477	0.566478	0.419097	0.314768
1199.072@2	0.274891	0.275067	0.202739	0.147549
1212.475@6.1	0.480026	0.419328	0.240203	0.211747
122.038@1.1	0.027802	0.0414377	0.0170866	0.0253744
1224.509@3.5	0.147134	0.132561	0.159586	0.10736
1228.442@6.1	0.332364	0.298303	0.188278	0.151687
1256.439@6.1	0.0721443	0.0696583	0.0530686	0.0411964
132.024@4.5	1.30455	1.22774	0.972103	0.582819
133.019@3.2	0.240903	0.173571	0.139445	0.0901345
135.067@5.1	0.174266	0.172441	0.137235	0.115887
135.903@1.9	0.0292962	0.0290265	0.0305956	0.0343856
147.035@1.7	0.224013	0.179656	0.127016	0.0443593
1478.42@6.1	0.13956	0.119082	0.121104	0.0675596
148.016@0.7	0.0688532	0.0388479	0.0696712	0.0471374
1489.058@1.4	0.205169	0.28039	0.163161	0.187245
1489.107@2.8	0.110619	0.101186	0.129593	0.121623
149.999@3.8	0.00736107	0.00511606	0.00453916	0.00283012
149.999@5	0.0520236	0.0330852	0.0493055	0.0184808
1517.141@2.8	0.310703	0.355571	0.630236	0.624704
1518.144@2.8	0.223052	0.251541	0.445393	0.462292
1525.145@2.8	0.0823695	0.0857994	0.124034	0.0907459
1530.175@2.8	0.0607044	0.0636083	0.0699437	0.0575318
1543.154@2.8	0.396248	0.479236	0.795637	0.693335
1544.159@2.8	0.29872	0.362541	0.599824	0.552903
1546.174@2.8	0.194911	0.216226	0.304549	0.279932
1550.156@2.7	0.114655	0.117527	0.0998292	0.0630198
1553.17@2.7	0.112678	0.113016	0.138525	0.0992517
1567.156@2.7	0.274495	0.364803	0.536542	0.395986
1568.159@2.7	0.253335	0.316172	0.487478	0.352471
1570.173@2.7	0.225244	0.27268	0.432003	0.335868
1571.183@2.7	0.201019	0.239338	0.38251	0.312873
1572.188@2.7	0.100591	0.113541	0.147187	0.126015
1575.17@2.7	0.154374	0.15446	0.194899	0.12671
158.069@7.5	0.222805	0.195374	0.165933	0.110532
1589.139@2.7	0.217774	0.306257	0.416348	0.281862
1591.154@2.7	0.405949	0.462076	0.569789	0.381622
1592.158@2.7	0.129811	0.178614	0.24467	0.168418
1595.184@2.7	0.621289	0.626493	0.930443	0.73162
1597.196@2.7	0.165734	0.179066	0.203341	0.133078
161.051@1.3	0.489582	0.388359	0.289854	0.103103
162.027@9.5	0.111276	0.0898692	0.0547154	0.0449462
164.006@9.5	0.855459	0.755393	0.575529	0.278529
1674.031@1.9	0.104198	0.0881467	0.0882723	0.0543922
168.978@5.9	0.174843	0.125841	0.10479	0.0796699
1700.55@6.1	0.173717	0.158084	0.135904	0.0956459
175.066@1.1	0.203638	0.141564	0.146919	0.045479
180.009@5	0.0282633	0.0171112	0.0279994	0.0126899
185.988@9.5	0.829822	0.723099	0.566356	0.267674
1888.036@2	0.108384	0.100079	0.0827597	0.0476004
1889.035@1.9	0.0555341	0.0472269	0.0443617	0.0259782
1890.036@1.9	0.0964916	0.0814912	0.0819418	0.0482757
1892.03@1.9	0.0845625	0.07118	0.0730008	0.0436852
1933.022@1.4	0.0570812	0.084064	0.0380506	0.0366835
564.14@0.6	0.0214466	0.0246923	0.011267	0.00698778
1alpha,25-dihydroxy-20,26,27-trimethyl-23-oxavitamin D3	0.143197	0.102372	0.0933718	0.0340765
216.041@3.8	0.182227	0.149927	0.128138	0.0703705
2-amino-4'-hydroxy-Propiophenone	0.0353417	0.0189062	0.021108	0.0118102
2036.949@1.4	0.090686	0.13963	0.0740268	0.0730734
204.092@4.1	0.00930732	0.00596764	0.00603459	0.0029668
2100.045@2	0.080323	0.0749502	0.061793	0.0439013
213.069@4.9	0.0130845	0.008957	0.00902615	0.00544745
215.188@2.3	0.10928	0.136564	0.082862	0.068593
217.929@9.5	0.0473711	0.0409396	0.0365111	0.0189909
222.02@5	0.0231384	0.01541	0.021786	0.00904499
222.038@1.2	0.0810654	0.117537	0.0452914	0.033088
227.084@3.9	0.0247364	0.0121907	0.017806	0.00728161
234.023@1.1	0.126958	0.108748	0.113316	0.0633528
238.013@9.5	0.0834111	0.0833541	0.0742353	0.062302
240.031@3.8	0.0152594	0.00833082	0.0107616	0.00454361
249.98@2.3	29.1357	29.2261	23.0273	16.4201
2507.048@1.9	0.0470688	0.0396331	0.0392561	0.0227106
251.161@0.8	0.0400298	0.0422716	0.0312206	0.0219457
251.998@6.8	0.0512275	0.0468596	0.110834	0.165827
2511.045@1.9	0.107463	0.0895534	0.091713	0.0547895
2517.037@1.9	0.091233	0.0754605	0.0792677	0.0500279
253.892@1.3	0.0218254	0.0160878	0.0233071	0.0145091
253.949@2.2	0.102506	0.0989811	0.0903426	0.0695007
254@1.1	0.0689482	0.0666474	0.0503406	0.033922
257.068@3.4	0.0273721	0.0178823	0.0167847	0.00797231
260.082@6.1	0.0949251	0.0648112	0.0889612	0.0314601
260.123@1.1	0.104743	0.169699	0.0711602	0.0730073
261.031@4.9	0.0146402	0.00940754	0.0104342	0.00819377
261.068@3.7	0.0158607	0.0121326	0.0105069	0.00573218
261.974@9.5	0.0858962	0.0781898	0.061075	0.0567343
266.01@1.1	0.0162386	0.012433	0.0141667	0.00886876
271.962@1.7	7.73464	8.1399	6.46906	4.67166
274.046@6.1	0.021339	0.0135407	0.0147509	0.00952638
277.062@5.1	0.0115696	0.00534811	0.00830593	0.00346654
280.047@1.8	0.0555469	0.0451644	0.0468298	0.0346624
284.022@1.1	0.00897475	0.00801317	0.00374619	0.00207319
284.038@1.9	0.328197	0.307134	0.273484	0.172282
289.976@6.2	0.00757216	0.00331828	0.00769561	0.00613033
2912.2@1.9	0.541832	0.445094	0.47232	0.265217
2914.197@1.9	0.460413	0.389544	0.408984	0.229831
2924.184@1.9	0.397317	0.363343	0.325073	0.17888
2926.179@1.9	0.598874	0.577497	0.446789	0.260989
2928.176@1.9	0.351913	0.279549	0.302193	0.171618
296.058@6.1	0.0217404	0.0174985	0.0209021	0.0103464
298.981@5.9	0.248304	0.187329	0.119624	0.110439
299.998@4.6	0.0621664	0.0426756	0.052742	0.0261432
299.998@6.6	0.0463423	0.0389951	0.0248212	0.017604
3,9,15-Docosatriynoic acid	0.058316	0.0452665	0.03664	0.0174855
3-Dehydroquinic acid	0.0328011	0.0230481	0.0225135	0.0138237
3-oxo-4-pentenoic acid	0.0136448	0.00843327	0.0127824	0.00598009
305.061@3.9	0.0422931	0.0220103	0.0293407	0.0151424
306.032@9.5	0.0230055	0.0261206	0.00837979	0.00528641
3159.062@2	0.0676607	0.0578489	0.0554712	0.0338821
318.008@6.6	0.0481131	0.0304538	0.0351495	0.0254635
318.009@4.6	0.0584945	0.0362364	0.0577508	0.0238732
318.009@5	0.0660897	0.0409366	0.0649179	0.0254458
320.035@6.9	0.263232	0.158943	0.200159	0.0840311
321.02@6.6	0.102575	0.0809419	0.0668618	0.061162
322.144@6.1	0.00812843	0.00460614	0.00685888	0.00301833
323.017@4.5	0.0331221	0.0215666	0.025189	0.0111409
327.994@1.1	0.551555	0.49522	0.463971	0.283275
330.099@2.9	0.0274841	0.0262795	0.0273067	0.01692
331.927@2.3	0.206084	0.210359	0.178556	0.140562
333.924@2.3	0.06876	0.0708894	0.0587696	0.0469924
334.068@6.7	0.0297138	0.0172921	0.0269058	0.0149574
335.018@1.3	0.023159	0.0188437	0.015397	0.00639723
335.046@1.9	0.834327	0.738925	0.716847	0.443861
339.04@1.9	0.422288	0.378561	0.361114	0.223057
343.002@6.6	0.0150326	0.011336	0.0101229	0.00641391
343.977@9.5	0.0686314	0.0564139	0.0514483	0.0252127
348.052@6.9	0.0213723	0.0106033	0.0202771	0.00975537
355.04@5.1	0.0247077	0.0205078	0.014626	0.00922888
361.137@5.1	0.00968151	0.0073109	0.00627889	0.00336112
365.043@5.4	0.0848911	0.0348168	0.065359	0.0248765
370.135@2.2	0.099349	0.0978043	0.0870051	0.06948
370.136@1.8	0.0238219	0.0252312	0.0212442	0.0187279
372.027@1	0.120726	0.119607	0.109153	0.0695114
376.958@5.9	0.15982	0.112984	0.0816951	0.0663998
377.974@5	0.0448762	0.030393	0.043539	0.0222364
378.056@4.1	0.00970921	0.00507769	0.0067135	0.00296289
384.151@2.2	0.0977474	0.0944342	0.0855099	0.0651372
387.309@2.1	0.302149	0.312125	0.222353	0.169003
388.049@1.9	0.722704	0.645194	0.609275	0.374787
389.022@7.7	0.00906746	0.00577014	0.00877442	0.00488001
390.046@1.9	0.609334	0.544961	0.514686	0.315113
392.13@6.1	0.132025	0.0916165	0.116553	0.0509565
395.985@5	0.0291224	0.0178703	0.0287895	0.0130806
397.035@6.8	0.10268	0.097386	0.0833057	0.0532606
397.034@6.8	0.0582641	0.0590232	0.0453047	0.0361132
398.012@6.9	0.112926	0.0524807	0.0831463	0.0350122
238,1001@6,1	7.46209	4.77967	6.45092	1.9563
4,7,10,13,16-docosapentaenoic acid	0.0349056	0.0237515	0.0205177	0.00902028
4,7,10,13-Eicosatetraenoic acid	0.0587854	0.040693	0.0297453	0.0189214
4,7,10,13-docosatetraenoic acid	0.0392603	0.0454035	0.0159244	0.00829728
145.11@1	0.230088	0.233651	0.161939	0.134201
400.229@0.7	0.0362792	0.0201119	0.0360176	0.0210664
411.03@1.3	0.0885729	0.086482	0.0590325	0.0484945
412.065@6.1	4.59883	2.85573	4.18521	1.37689
415.058@3.7	0.143993	0.100209	0.0889059	0.0307804
416.06@6.1	0.0320419	0.0185872	0.0272311	0.00949768
424.23@0.7	0.0149641	0.0130191	0.00473439	0.00338677
424.95@6.6	0.011505	0.0107972	0.00669851	0.00461912
425.35@3.4	0.155095	0.127754	0.109565	0.105394
426.247@0.7	0.0464142	0.0320063	0.0307853	0.0147818
427.367@3.4	0.13199	0.126294	0.149509	0.128039
429.373@0.8	0.152931	0.124336	0.162677	0.122545
433.016@5.1	0.0188078	0.0113303	0.0116465	0.00485007
435.034@1.1	0.0130849	0.0133506	0.00766315	0.00487372
436.062@1.6	0.0193651	0.0132666	0.0148172	0.00682106
437.291@2.9	0.0529691	0.0512286	0.0371685	0.0190952
441.052@1.9	1.669	1.49627	1.39492	0.854373
441.868@1.9	0.0298814	0.0236185	0.0185616	0.0125315
443.049@1.9	1.66867	1.49603	1.39497	0.854383
449.04@1.9	0.276358	0.283134	0.196881	0.127775
449.187@6.1	0.120924	0.0603587	0.100996	0.0331303
454.205@0.7	0.0160957	0.0157386	0.0102166	0.00630975
454.935@5.9	0.0538112	0.0361175	0.0280574	0.0222498
457.831@6.9	0.0243881	0.025016	0.0217159	0.0181734
472.031@6.1	0.0351935	0.0218556	0.0332563	0.0132626
476.001@6.1	0.0193731	0.0113083	0.0157534	0.0043494
476.197@6.1	0.0773087	0.100821	0.0371443	0.0310699
476.974@6.6	0.0305509	0.0191395	0.0197653	0.0162898
488.078@6.1	0.41094	0.294801	0.388534	0.178765
488.107@7.9	0.0713177	0.0680438	0.0477756	0.0404233
489.169@6.6	0.0158171	0.0105822	0.0114409	0.00709724
490.042@6.1	1.23209	0.852347	1.1844	0.439025
495.332@3.9	0.40431	0.251544	0.381818	0.148266
496.052@1.9	1.7297	1.5432	1.4575	0.892657
498.18@6.1	0.100252	0.0740223	0.078	0.0352198
499.96@2.4	0.0760203	0.0689457	0.076155	0.0695429
5'-Methylthioadenosine	0.427852	0.284605	0.447126	0.184408
308,2709@0,7	0.0334311	0.0281162	0.0212947	0.0116124
5-Amino-6-(5'-phosphoribosylamino)uracil	0.0440962	0.0294559	0.0392754	0.012299
5-Hepten-3-ynoic acid, 7-[[(3,4-dihydro-3,4-dihydroxy-1-naphthalenyl)methyl]amino]-2,2-dimethyl-	0.114632	0.1112	0.0839297	0.0706
502.208@0.7	0.0343643	0.031746	0.0176927	0.0104971
502.37@0.7	0.226226	0.264346	0.17123	0.136062
503.03@6.4	0.0197241	0.0171363	0.0116882	0.00895075
507.369@4	0.0561137	0.0443888	0.039628	0.0256559
510.06@6.1	0.649829	0.516198	0.614653	0.323484
514.145@6.1	0.495898	0.260742	0.404981	0.160973
519.328@3.8	0.0644134	0.0652385	0.0479482	0.0372687
520.161@6.1	0.227277	0.168683	0.205666	0.0945835
521.348@3.8	0.222465	0.131901	0.227854	0.0886387
521.942@1.7	1.80317	1.794	1.53471	1.1819
523.364@3.8	0.381997	0.254366	0.384147	0.145592
527.77@1.9	0.0225975	0.019777	0.0135552	0.0135425
532.042@6.1	0.34266	0.310607	0.32618	0.19393
532.911@5.9	0.0239066	0.0164481	0.0167891	0.0139292
547.07@1.1	0.056016	0.0538051	0.0341724	0.0241638
548.275@0.5	0.0134753	0.0101362	0.0139505	0.00872204
550.008@6.1	0.0385966	0.0279191	0.0369862	0.0155041
551.053@1.9	0.616554	0.534083	0.521779	0.309229
552.386@0.7	3.69165	4.46785	2.96163	2.73941
553.05@1.9	0.299153	0.259855	0.250872	0.148841
553.98@6.1	0.0110191	0.00594816	0.00921155	0.00296551
555.047@1.9	0.134165	0.116444	0.112725	0.0678414
556.282@0.8	0.0258706	0.0221246	0.022403	0.0107302
568.018@6.1	0.326623	0.263175	0.336718	0.136457
569.78@1.9	0.0728732	0.0416378	0.0540157	0.0375581
573.489@0.7	0.0224978	0.0227028	0.0309322	0.0260576
576.512@0.6	0.0541307	0.0563538	0.0929377	0.0716024
580.215@6.1	0.131616	0.126413	0.111677	0.0581286
588.036@6.4	0.0805369	0.0836665	0.0735002	0.0558577
597.533@0.7	0.0179183	0.0177427	0.0229148	0.0215325
6-Thioxanthine	0.0175437	0.0139142	0.0166589	0.00987635
600.327@1.8	0.0407613	0.0285087	0.0692508	0.0422539
600.508@0.7	0.0184849	0.0169377	0.0279696	0.0249709
602.059@1.9	0.41448	0.366561	0.352673	0.219855
602.197@6.1	0.293335	0.174001	0.265952	0.0992228
604.056@1.9	0.33445	0.293559	0.285449	0.178884
609.443@0.7	0.33746	0.425755	0.268446	0.2611
620.295@1.6	0.0152505	0.00971222	0.0141564	0.00661193
629.063@6.1	0.0137825	0.00974224	0.0086276	0.0060104
630.795@1.9	2.22877	2.64262	1.38472	1.11142
635.751@1.8	0.0834376	0.0578464	0.0465669	0.0384574
641.148@8.2	0.095871	0.129212	0.128059	0.108638
644.811@1.8	0.0616717	0.044697	0.0451513	0.0418159
645.605@0.7	0.10664	0.154872	0.0905855	0.106918
645.995@6.1	0.0820536	0.066447	0.0841617	0.0375789
649.746@1.9	0.053763	0.04614	0.0319883	0.0203169
663.108@6.7	0.0108678	0.0106948	0.00674873	0.00361793
663.109@6.6	0.112054	0.091559	0.0902413	0.0650304
671.727@1.8	0.0285106	0.0248544	0.0134114	0.0112855
671.822@1.9	0.0926417	0.0755191	0.0638175	0.0504283
674.536@3.6	0.300551	0.174848	0.330026	0.183767
676.764@1.8	0.017221	0.0122462	0.00970586	0.00774245
69.058@5.4	0.102732	0.0772759	0.0721915	0.0473308
691.552@2.9	0.110771	0.0996088	0.102021	0.0669206
699.519@1.5	0.0496916	0.0629278	0.0605059	0.0897192
6alpha-Hydroxy-3-oxo-5beta-cholan-24-oic Acid	1.06127	0.718018	0.782188	0.720745
700.552@3.5	1.14851	0.772219	1.30435	0.739505
702.537@1.5	0.0175371	0.0193411	0.0165884	0.0196183
702.569@3.5	11.8688	9.57181	16.4106	11.0331
706.068@1.9	9.71913	8.33519	8.41653	5.17569
71.074@4.9	0.366258	0.232855	0.251168	0.0908021
714.056@1.9	4.51501	3.98559	3.64275	2.67717
714.296@6.1	1.92646	2.36183	0.926277	0.904106
716.582@3.5	0.169096	0.162038	0.22965	0.179565
717.567@2.9	1.19034	1.17027	1.04086	0.724618
718.532@1.6	0.039112	0.0534529	0.0266927	0.0253769
718.535@1.5	0.165791	0.227694	0.117544	0.100419
719.589@2.9	1.29574	1.17276	1.10034	0.94227
720.588@2.9	0.374017	0.344246	0.283359	0.260311
721.503@1.4	0.498031	0.565953	0.478634	0.544705
723.519@1.4	0.66981	0.778631	0.683524	0.782163
723.521@1.4	5.24048	6.20104	4.63015	4.87135
724.522@1.4	0.287132	0.334745	0.295938	0.346045
724.524@1.4	1.4382	1.78969	1.3971	1.51624
724.987@0.7	0.0201194	0.0318174	0.0164171	0.0208153
725.553@3.5	0.431338	0.325751	0.545776	0.324916
727.548@1.5	0.0383683	0.0473789	0.0507162	0.0736106
727.551@1.4	0.1824	0.220032	0.212987	0.282727
728.583@3.5	0.490757	0.511699	0.503724	0.427238
730.598@3.5	0.3866	0.380324	0.606816	0.758945
734.567@2.9	2.22851	3.0504	1.59583	1.35843
737.533@1.4	0.0510106	0.0630807	0.0540197	0.0618038
737.535@1.4	1.57743	2.00594	1.40049	1.30405
738.543@3.5	0.0307989	0.0187328	0.0344656	0.0185062
746.604@2.8	1.38534	1.31696	1.35653	1.02406
748.159@6.1	0.329504	0.220494	0.326441	0.153749
748.572@3.5	0.00973819	0.00720393	0.0121594	0.00804742
749.536@1.4	3.365	3.53996	3.11458	3.39061
752.243@6.1	0.373338	0.257901	0.245441	0.139464
752.553@1.4	0.246874	0.350049	0.215512	0.264401
752.555@1.4	1.27478	1.99548	1.04207	1.18488
753.711@6.1	0.0528432	0.055056	0.0431595	0.0329697
758.257@6.1	0.0164122	0.0117466	0.00982467	0.00569856
758.259@6.1	0.113253	0.0862279	0.0900747	0.0517609
758.63@3.5	0.112068	0.138564	0.10265	0.129709
759.521@1.4	1.3947	2.11616	0.912665	0.800936
759.579@2.8	44.9645	47.5454	51.7853	36.9387
760.118@6.9	0.0204813	0.0175608	0.0268533	0.0304947
760.582@2.8	11.4412	12.5718	12.7143	9.76826
762.588@3.5	0.129916	0.0921158	0.164165	0.104241
764.125@6.1	0.102084	0.0830752	0.103155	0.0526662
765.532@1.4	4.96454	7.77958	3.8971	3.58746
765.569@3.5	0.0213041	0.0183219	0.0211276	0.0135054
766.556@0.6	0.107038	0.112338	0.165042	0.133806
767.52@2.9	0.0417773	0.0409413	0.0296429	0.0199732
767.583@2.7	5.96045	5.54307	6.32399	3.89423
768.548@1.4	0.350713	0.527852	0.266307	0.29756
768.55@1.4	1.34686	1.7719	1.24787	1.25145
770.141@6.1	0.194034	0.143365	0.187386	0.0919459
771.071@2.8	0.0707995	0.0639255	0.0769319	0.0593819
771.569@1.5	0.0164438	0.02319	0.0135053	0.0163863
771.607@2.8	1.15879	1.0473	1.59102	1.38826
772.524@0.6	0.181928	0.152189	0.263139	0.182451
775.549@1.4	0.276309	0.389019	0.176301	0.154669
775.551@1.3	1.26521	2.10855	0.657959	0.661424
777.563@1.4	0.839218	1.43199	0.447441	0.473153
779.579@1.4	0.357394	0.618696	0.18607	0.181235
779.58@1.4	0.0593806	0.0931732	0.0382926	0.0437099
780.381@0.7	0.288135	0.387251	0.235161	0.213364
781.476@1.4	0.194533	0.241722	0.163864	0.187717
781.563@2.7	34.1132	32.3323	43.558	30.3182
782.629@3.4	0.332961	0.452526	0.256387	0.281528
783.502@1.2	0.0247158	0.022628	0.0251293	0.0192327
783.579@2.7	31.4065	32.4978	33.9476	27.3871
786.661@3.4	0.575537	0.76095	0.432606	0.45226
791.584@2.6	6.38915	6.16307	8.08459	6.36456
793.582@0.6	0.0946417	0.100419	0.108888	0.0801987
793.6@2.6	7.79374	7.25731	8.34627	6.2922
793.904@2.3	0.157507	0.177834	0.146013	0.12894
794.509@0.6	0.0733311	0.0488418	0.0902061	0.0658829
794.603@2.6	3.87241	3.23194	4.02965	3.11993
795.07@2.7	0.189007	0.180208	0.208087	0.168418
795.55@2.8	0.138065	0.128325	0.125888	0.08044
795.61@2.6	3.80165	3.43264	4.28353	3.66775
796.078@2.7	0.263274	0.28401	0.330956	0.234926
796.524@0.6	0.0742654	0.0506419	0.090035	0.0724574
796.617@2.7	1.07474	0.98699	1.36065	1.26587
797.527@0.6	0.0479936	0.0434247	0.0454251	0.0324826
807.07@2.7	0.115267	0.110813	0.1157	0.0807377
809.529@3.5	0.0935964	0.0834428	0.090932	0.0652618
809.595@2.6	27.708	29.8192	30.1344	22.1046
810.598@2.6	8.68311	11.0329	9.37447	7.99782
810.662@3.4	1.43181	1.66829	1.0183	1.00162
811.537@0.6	0.121383	0.113679	0.1139	0.0811295
812.537@1.2	0.181857	0.227534	0.187509	0.177055
812.538@1.2	0.989446	1.23279	0.795965	0.614383
812.611@2.7	1.53988	1.91164	1.85645	1.78485
812.677@3.4	1.56062	2.18585	1.02802	1.16023
813.548@1.2	0.128783	0.173426	0.142872	0.142706
813.621@2.7	0.86427	0.957665	0.91775	0.869474
815.116@8.2	0.0316157	0.0289477	0.0217821	0.0170519
817.599@2.6	2.09833	1.80688	1.55363	1.2023
820.524@0.6	0.118874	0.11001	0.163466	0.0985492
821.527@0.6	0.0624062	0.0536496	0.083629	0.050974
822.568@2.8	0.0855948	0.0822073	0.0760602	0.0563207
823.574@2.8	0.133509	0.113734	0.106431	0.0677139
824.554@0.6	0.0228449	0.0198811	0.0242058	0.018817
825.557@0.6	0.0122978	0.0122295	0.0114152	0.00895693
829.562@2.6	3.45246	3.77576	4.19002	2.92089
83.037@6.9	0.247135	0.130999	0.193091	0.122476
831.577@2.6	6.19101	7.00786	6.47138	4.61097
833.515@1.1	0.313273	0.40138	0.274033	0.269626
833.518@1.1	1.15158	1.73456	0.879693	0.737647
836.349@1.9	0.0477467	0.0398342	0.0407432	0.0252304
836.612@2.6	0.990452	1.13014	0.981636	0.767766
837.547@1.1	0.163937	0.215921	0.140438	0.143742
837.552@0.6	0.217066	0.204674	0.223679	0.130564
837.555@2.8	0.648458	0.584967	0.667206	0.486743
838.552@1.1	0.0714208	0.0977859	0.067247	0.0768806
838.625@2.6	0.944712	0.977278	0.821336	0.626746
839.564@1.2	0.0558358	0.0848037	0.0456258	0.0499811
840.491@0.6	0.155303	0.135389	0.142662	0.0895192
840.568@1.2	0.0191691	0.0267422	0.0188434	0.01888
844.522@0.6	0.0256398	0.0143232	0.0352651	0.0255373
85.017@1.6	0.0518442	0.0441247	0.0577723	0.0455401
85.089@4	0.387675	0.27539	0.25693	0.164621
851.497@2.8	0.0489227	0.0521532	0.0238969	0.0164962
851.546@2.5	1.06477	1.26376	1.30796	0.980394
853.562@2.5	1.35723	1.63542	1.72667	1.39424
855.5@1.1	0.224284	0.305359	0.165647	0.140102
855.577@2.5	1.11353	1.31172	1.36909	0.98811
857.518@1.1	0.240316	0.320143	0.184094	0.150286
859.533@1.1	0.173375	0.21965	0.128829	0.114435
859.539@2.7	0.944543	0.912891	0.906824	0.645662
859.604@2.6	0.377811	0.412077	0.354075	0.237651
861.553@2.7	0.638417	0.493202	0.770434	0.585879
866.508@0.6	0.0722808	0.0558406	0.126612	0.0687033
867.088@5.4	0.0321682	0.0241568	0.0223961	0.0122894
869.485@1.2	0.0180741	0.0168964	0.0209494	0.0181764
871.573@2.6	0.255507	0.243867	0.174935	0.114056
875.495@2.6	0.0253372	0.0233319	0.0184632	0.0124085
876.529@3.5	0.0448742	0.0323352	0.0544393	0.0358532
888.492@0.6	0.0687269	0.0666781	0.0837037	0.0456322
889.478@1.6	0.041884	0.0498429	0.0386195	0.0367439
89.049@6.3	0.0220182	0.0141273	0.0171946	0.00878919
892.496@1.6	0.0186821	0.0223099	0.015869	0.0148274
897.483@1.4	0.237621	0.274857	0.24241	0.273794
898.485@1.4	0.124325	0.141232	0.131049	0.150704
90.978@1.9	0.110694	0.0906914	0.0949511	0.055769
901.509@2.5	0.0525464	0.0467315	0.0455243	0.030519
910.555@1.1	0.135345	0.179786	0.128372	0.132553
911.498@1.4	0.0177403	0.0210406	0.0192563	0.0214958
912.57@1.1	0.128753	0.18016	0.124975	0.133474
915.492@1.5	0.172577	0.206478	0.160538	0.166177
917.507@1.5	0.125484	0.154341	0.114831	0.122019
925.513@1.4	0.207273	0.287705	0.181987	0.222455
926.515@1.4	0.109755	0.155319	0.0963479	0.116461
926.665@0.7	0.239337	0.171056	0.171135	0.131811
936.497@3.5	0.0538265	0.040075	0.0655107	0.043565
939.494@1.4	0.344779	0.463763	0.321822	0.331358
941.509@1.4	0.29662	0.445135	0.244392	0.253791
942.512@1.4	0.159131	0.242253	0.129306	0.137157
947.499@1.4	0.111421	0.157914	0.0745335	0.0732676
963.501@1.4	0.0783992	0.110274	0.0541108	0.0491012
964.275@6.1	0.12931	0.0998097	0.108353	0.0620841
971.495@0.6	0.0501607	0.0527665	0.0762314	0.0569305
973.502@1.4	0.221727	0.242506	0.202223	0.197545
974.53@3.5	0.380251	0.308327	0.426184	0.268164
975.46@1.4	0.0431454	0.0499404	0.0447975	0.0488502
985.495@1.2	0.0774861	0.0830645	0.0823934	0.0760697
986.259@6.1	0.201834	0.161856	0.179603	0.100371
989.293@2.2	0.0264888	0.027924	0.0244541	0.0209782
990.343@6.1	0.45134	0.408017	0.318178	0.235483
990.514@1.4	0.160181	0.216718	0.116271	0.103484
991.496@2.8	0.116285	0.117873	0.113291	0.0963019
Lactic acid	0.0384061	0.0348463	0.021876	0.0151212
Alanine	0.103212	0.0799126	0.0788093	0.0729926
Valine	0.0703444	0.0363018	0.0536177	0.0298161
Serine	0.0139244	0.0106765	0.00918445	0.00763769
Phosphoric acid	1.38319	0.864705	1.65874	1.37495
Isoleucine	0.0454462	0.0267766	0.0367916	0.0229192
Glycine	0.110466	0.0808599	0.0778969	0.0801407
Glyceric acid	0.00253854	0.00192954	0.00159846	0.000755425
Threonine	0.0107085	0.00494418	0.00823044	0.00435899
Threitol	0.0221183	0.0132796	0.0154439	0.00618083
Aspartic acid	0.00849425	0.00919298	0.0041671	0.00482838
Pyroglutamic acid	0.216322	0.152989	0.150799	0.129962
Erythronic acid	0.00872496	0.00376975	0.00677182	0.00272458
Threonic acid	0.0186527	0.0117388	0.0112956	0.0121601
Asparagine	0.00434943	0.00278908	0.00354699	0.00142208
Glutamic acid	0.0253371	0.0487666	0.0140755	0.0403503
Arabinose	0.00275272	0.00276274	0.0020074	0.00135002
Ribose	0.00308422	0.00153588	0.00259448	0.00142364
Isocitric acid	0.00211428	0.00118163	0.00130372	0.000654111
Citric acid	0.10521	0.0700101	0.0438822	0.0295822
Panthenol	0.0017635	0.0011519	0.00128459	0.00047469
Mannose	0.00842677	0.00522566	0.00648358	0.00364678
Fructose	0.099032	0.0498327	0.0727894	0.0188921
Glucose	0.480959	0.274075	0.485997	0.245882
Sorbitol	0.0352422	0.0195333	0.0295755	0.0089402
myo-Inositol	1.76032	1.47626	1.19475	1.14349
n-9,12-(Z,Z)-Octadecadienoic acid methyl ester	0.0199244	0.0149645	0.0136188	0.012766
myo-Inositol-1-phosphate	0.0271694	0.0353202	0.0284834	0.0476758
alpha-Tocopherol	0.00787665	0.0083461	0.0065572	0.00530146
Cholesterol	0.460446	0.587297	0.37947	0.331633
AMP	0.378603	0.392252	0.226929	0.208653
Acetoacetic acid	0.0247701	0.016816	0.0231507	0.00866353
317,1407@6,1	0.19673	0.154935	0.150619	0.088481
Allantoin	0.042923	0.0275417	0.0304427	0.0114985
Allose	0.204122	0.142549	0.11133	0.0768138
Arginine	4.75792	3.38808	3.54469	1.2898
Asparangine	0.731194	0.651349	0.42173	0.341313
Aspartate	0.652451	0.566651	0.449459	0.385175
257,1025@8,0	0.512802	0.230252	0.595577	0.266465
C18-OH Sulfatide	0.0245319	0.0193488	0.036331	0.0259245
CDP-ethanolamine	0.0708233	0.0699118	0.0501263	0.0444323
381.074@3.9	0.241323	0.10354	0.187034	0.0777445
776,5539@0,6	0.103475	0.130735	0.0912224	0.0755189
161.105@7.5	0.622502	0.307948	0.677403	0.387179
383,038@3,9	0.011006	0.00540023	0.00890175	0.00382855
Ceramide (d18:1/24:1(15Z))	0.0837503	0.110312	0.0679643	0.0779219
334.087@6.1	0.0767514	0.039999	0.0658973	0.0247371
103.1@8.9	0.514144	0.248569	0.584256	0.305159
Creatine	1.56769	1.12971	1.08653	0.698094
Creatinine	0.6591	0.380669	0.559789	0.184932
307,0835@6,4	1.87396	1.94387	1.15954	1.1586
224,0298@9,5	0.0665095	0.0481826	0.0239952	0.0214325
Cysteine	0.111143	0.0818706	0.115595	0.0512686
431.053@5.1	0.0616852	0.0524103	0.0397974	0.0261046
337.151@4.5	0.00630674	0.00504189	0.00443298	0.0023897
Diaminopimelic acid	0.0815831	0.0813286	0.0558127	0.0389477
613.768@1.9	0.0864795	0.0746091	0.0493333	0.0336936
301.297@4	0.0568782	0.0493495	0.0442819	0.0302993
Dihydroxyacetone (glycerone)	0.286633	0.215437	0.325815	0.151919
Etn-1-P-Cer(d14:1/18:0)	0.297296	0.29607	0.284078	0.188309
Famotidine	0.661119	0.591438	0.563643	0.347411
494.055@1.9	1.96462	1.77991	1.66812	1.02475
Flavin adenine dinucleotide (FAD)	0.0580535	0.0560891	0.046227	0.0288325
Fructose/Mannose/myo-Inositol	0.0918614	0.0829467	0.0746176	0.0588598
Fumaric acid	0.0174286	0.00840036	0.0162219	0.0121266
807.579@2.6	26.8044	29.4253	30.9274	21.2789
727.514@2.8	0.318008	0.363086	0.299473	0.189313
755.546@2.8	1.04212	0.92753	1.22551	0.761221
811.606@2.7	3.37936	4.4001	4.28409	4.1623
835.607@2.6	1.64434	1.89681	1.61352	1.20282
745.6@2.8	3.1472	2.83694	3.10076	2.22401
819.616@2.6	1.01025	1.04568	0.978139	0.712488
GPEtn(13:0/20:0)[U]	0.800684	0.772034	0.960833	0.725033
715.516@1.5	0.458931	0.530633	0.488886	0.41814
GPEtn(16:0/20:4(5Z,8Z,11Z,14Z))	0.291084	0.342205	0.307689	0.312355
GPEtn(16:0/22:4(7Z,10Z,13Z,16Z))	4.43626	5.81251	4.09303	3.84437
GPEtn(18:0/0:0)	0.0161504	0.0145645	0.0193125	0.0119048
GPEtn(18:0/18:1(11Z))	0.418263	0.496935	0.292944	0.236231
741.53@1.5	1.78077	2.24056	1.45806	1.34364
GPEtn(18:0/22:6(4Z,7Z,10Z,13Z,16Z,19Z))	0.913686	1.53146	0.488869	0.413247
GPEtn(18:1(11Z)/18:1(9Z))[U]	1.50411	1.92538	1.20123	1.18622
GPEtn(19:0/16:0)[U]	8.7481	10.9948	6.28433	5.0402
GPEtn(O-16:0/22:5(4Z,7Z,10Z,13Z,16Z))	4.3434	6.8162	2.86928	3.20465
731.548@2.8	10.1014	11.9034	8.53791	6.33812
GPGro(18:0/18:0)[U]	0.441304	0.727023	0.230343	0.224877
GPGro(18:0/18:1(11Z))	0.321138	0.379566	0.387565	0.335094
GPGro(18:0/20:4(5Z,8Z,11Z,14Z))	0.0498386	0.0491717	0.0478956	0.0340401
GPGro(18:0/22:6(4Z,7Z,10Z,13Z,16Z,19Z))	0.0561252	0.044802	0.0800404	0.0543134
GPGro(18:1(9E)/0:0)[U]	0.0292927	0.0204141	0.0179842	0.0105349
GPGro(18:1(9E)/18:1(9E))[U]	0.130002	0.110756	0.210352	0.150197
770.509@0.6	0.182394	0.146511	0.243957	0.159054
GPIns(16:0/18:1(9Z))	0.173649	0.210301	0.159072	0.176182
GPSer(18:0/18:1(9Z))[U]	0.612727	0.671358	0.586357	0.545843
GPSer(18:0/20:4(5Z,8Z,11Z,14Z))	0.392133	0.498293	0.371059	0.340406
GPSer(18:0/22:6(4Z,7Z,10Z,13Z,16Z,19Z))	1.05865	1.25634	0.922986	0.805485
GPSer(18:1(9Z)/18:1(9Z))	0.121765	0.119326	0.146691	0.123036
787.536@1.2	1.883	2.3729	1.80907	1.57517
GPnEtn(16:0/18:1(9Z))	0.0545196	0.0696094	0.0511525	0.0550138
Galabiosylceramide (d18:1/16:0)	0.310411	0.320593	0.400157	0.450437
Ganglioside GM3 (d18:1/16:0)	0.0661023	0.0566051	0.0439769	0.0253566
Glutamate	8.85054	8.70108	5.1495	6.1425
Glutamine	20.9897	12.7468	12.5897	5.08695
Gly Gly Phe	0.101309	0.0969789	0.0658897	0.0446758
Glycerylphosphorylethanolamine	0.0214821	0.0164992	0.0178649	0.00894543
Guanosine	0.111859	0.100891	0.0672164	0.0461906
478,2059@0,7	0.0430372	0.0442103	0.0267314	0.0152106
Histidine	0.433168	0.320189	0.303358	0.197409
Hypoxanthine	1.12484	1.20535	0.680429	0.457604
302,2255@07	0.0253355	0.0279081	0.0165273	0.00715344
Indoleacrylic acid	0.674786	0.276583	0.502342	0.155145
Inosine	0.375702	0.409059	0.279982	0.229088
Isoleucine/Leucine	17.1201	8.84991	12.507	4.90743
L-2-Aminoadipic acid	0.542543	0.633455	0.270714	0.191746
232,1434@3,9	0.0195697	0.0198376	0.0126709	0.00608137
Leucine	0.0576853	0.0350241	0.0427678	0.0208609
Lysine	0.429399	0.340474	0.299557	0.181075
Mannitol	0.0630834	0.0440692	0.0440007	0.0212206
Methionine	1.69375	0.839556	1.29475	0.522606
Methionine sulfoxide	0.282696	0.252616	0.282301	0.238645
398.997@6.6	0.0956465	0.0659659	0.0628448	0.048381
N-Acetyl-L-Histidine	0.265915	0.251869	0.186452	0.163679
N-Acetyl-a-neuraminic acid	0.0280853	0.0141813	0.0291087	0.0396017
N-Acetylgalactosamine 4-sulphate	0.0579247	0.0636729	0.0703858	0.0711208
N-Palmitoylsphingosine	0.0462134	0.0469098	0.0640152	0.0538046
NAD	0.0221432	0.0134711	0.0144815	0.0120545
NADH	0.0109796	0.0165031	0.00427665	0.0103797
Nervonic acid	0.0108633	0.00997188	0.00931157	0.00539133
122,0479@1	0.853949	0.522903	1.32254	0.853736
282.062@6.2	0.582151	0.633968	0.511777	0.346557
282.062@6.1	0.567766	0.613296	0.500911	0.346891
299.282@3.6	0.635583	0.663291	0.527553	0.328722
809.426@2.2	0.0860542	0.0928375	0.0766041	0.0643411
399.335@3.5	0.386783	0.319311	0.358828	0.348235
296.152@6.1	0.123374	0.0710263	0.090985	0.0341612
Pantothenic Acid	0.0618893	0.0356016	0.0563367	0.0312169
Phenylalanine	2.60032	1.65419	1.63651	0.910256
Phosphatidyl glycerol	0.0492669	0.0257389	0.043741	0.023946
791.566@2.8	0.212146	0.199991	0.197965	0.136188
Phosphoenolpyruvate	0.00113481	0.00143808	0.000483213	0.000831324
339,0449@3,7	0.0402996	0.0186998	0.0286946	0.0122228
218,072@1,2	0.0873522	0.0749747	0.0428331	0.0325546
Proline	4.35555	2.32747	2.85167	1.4867
Purine	14.3071	14.9856	12.6657	8.92347
Resolvin D1	0.149189	0.154124	0.125489	0.0971247
S-Adenosylhomocysteine	0.119477	0.111276	0.0770347	0.0461614
SM(d18:1/18:0)	0.273008	0.250977	0.362463	0.382582
SM(d18:1/22:0)	0.11538	0.159167	0.085656	0.0858483
SM(d18:1/24:1(15Z))	0.801044	1.12676	0.5463	0.599809
842,5079@0,6	0.0372325	0.0203162	0.046184	0.0302099
840.493@0.6	0.0303951	0.0169224	0.0349688	0.0227765
203.115@6.2	1.715	1.75338	1.23141	0.967509
314,0861@0,7	0.00659532	0.0087836	0.00355932	0.00363335
532.118@6.1	0.0781424	0.0680346	0.0689787	0.0478538
358,142@6,1	0.0220651	0.0158489	0.0205908	0.0113968
Taurine	0.521331	0.406383	0.251361	0.227304
499,2972@0,7	0.0287706	0.0198587	0.0291098	0.0151716
180,0646@6,6	0.150965	0.102333	0.110743	0.0881606
Threonine/Homoserine	1.01085	0.870664	0.812629	0.656079
Trans-4-Hydroxy-L-proline	0.784007	0.459974	0.621709	0.217902
398.167@2.2	0.0709689	0.068663	0.0619436	0.0486488
Tryptophan	0.76596	0.387619	0.554908	0.207341
Tyrosine	2.01723	1.00238	1.46682	0.542713
UDP-N-acetyl-D-galactosamine	0.0948985	0.0775722	0.062321	0.0490869
UDP-glucose	0.0120403	0.0103908	0.00882263	0.00678515
174,1015@6,4	0.131275	0.124693	0.0900542	0.0738299
216,1471@3,4	0.0712732	0.0664545	0.0437182	0.0315792
267,0967@1,6	0.255946	0.19328	0.161077	0.105354
Xanthine	0.0582643	0.0520874	0.0371121	0.0199332
694.126@6.3	0.0460654	0.0369272	0.033046	0.0211432
262,0964@1,6	0.0293987	0.0202622	0.021645	0.00731173

## Sheet: DifferentialAnalysis
Metabolite	local.p.adj	Responder/Non-responder: local.p	Responder/Non-responder: ratio
424.23@0.7	1	0.00956155	-1.66026
224,0298@9,5	1	0.0055242	-1.47081
306.032@9.5	1	0.0503953	-1.457
NADH	1	0.195729	-1.36027
4,7,10,13-docosatetraenoic acid	1	0.0691618	-1.30183
Citric acid	1	0.00561379	-1.26157
284.022@1.1	1	0.0264642	-1.26045
Phosphoenolpyruvate	1	0.142674	-1.23172
671.727@1.8	1	0.0449583	-1.08804
476.197@6.1	1	0.159031	-1.05749
714.296@6.1	1	0.14296	-1.05644
298.981@5.9	1	0.0315432	-1.0536
Taurine	1	0.0351215	-1.05244
851.497@2.8	1	0.0945691	-1.03368
113.995@2.6	1	0.147586	-1.03228
218,072@1,2	1	0.0483275	-1.02812
Aspartic acid	1	0.121341	-1.02744
162.027@9.5	1	0.0410127	-1.02412
L-2-Aminoadipic acid	1	0.130602	-1.00297
1212.475@6.1	1	0.0614807	-0.998858
4,7,10,13-Eicosatetraenoic acid	1	0.0210571	-0.982798
376.958@5.9	1	0.0304382	-0.968125
502.208@0.7	1	0.0702961	-0.957756
775.551@1.3	1	0.302333	-0.943302
779.579@1.4	1	0.318328	-0.941672
454.935@5.9	1	0.0275312	-0.939523
GPGro(18:0/18:0)[U]	1	0.298294	-0.93799
564.14@0.6	1	0.143724	-0.928645
777.563@1.4	1	0.328455	-0.907348
GPEtn(18:0/22:6(4Z,7Z,10Z,13Z,16Z,19Z))	1	0.31502	-0.902251
299.998@6.6	1	0.0659526	-0.900756
314,0861@0,7	1	0.231426	-0.889843
Allose	1	0.037337	-0.874592
Glutamic acid	1	0.496638	-0.848066
635.751@1.8	1	0.0506781	-0.841392
222.038@1.2	1	0.27301	-0.83985
676.764@1.8	1	0.0560937	-0.827243
1228.442@6.1	1	0.110409	-0.819897
147.035@1.7	1	0.0596467	-0.818575
Lactic acid	1	0.108189	-0.811985
613.768@1.9	1	0.0945574	-0.809796
Asparangine	1	0.11793	-0.793934
133.019@3.2	1	0.057526	-0.788753
Glutamate	1	0.190355	-0.781332
424.95@6.6	1	0.129471	-0.780353
435.034@1.1	1	0.157153	-0.771899
4,7,10,13,16-docosapentaenoic acid	1	0.0416948	-0.766594
773.536@1.3	1	0.340173	-0.761372
355.04@5.1	1	0.0983359	-0.756423
161.051@1.3	1	0.0722188	-0.756225
503.03@6.4	1	0.122293	-0.7549
649.746@1.9	1	0.110561	-0.749069
2-amino-4'-hydroxy-Propiophenone	1	0.0210478	-0.743581
758.257@6.1	1	0.0646377	-0.740286
168.978@5.9	1	0.0811777	-0.738549
AMP	1	0.200113	-0.738446
Glutamine	1	0.0289071	-0.737433
527.77@1.9	1	0.156572	-0.737317
Guanosine	1	0.135172	-0.734795
Hypoxanthine	1	0.198556	-0.725207
Threonic acid	1	0.10295	-0.723626
547.07@1.1	1	0.167379	-0.713007
257.068@3.4	1	0.0496155	-0.705557
216,1471@3,4	1	0.162419	-0.705124
GPGro(18:1(9E)/0:0)[U]	1	0.070379	-0.703811
122.038@1.1	1	0.40178	-0.702321
Isocitric acid	1	0.0298064	-0.697527
149.999@3.8	1	0.0750526	-0.69749
415.058@3.7	1	0.0581001	-0.695645
307,0835@6,4	1	0.233914	-0.692533
433.016@5.1	1	0.0364886	-0.691432
663.108@6.7	1	0.175527	-0.687379
478,2059@0,7	1	0.194217	-0.687045
441.868@1.9	1	0.115748	-0.686925
630.795@1.9	1	0.268484	-0.686656
629.063@6.1	1	0.0943186	-0.675806
3,9,15-Docosatriynoic acid	1	0.100656	-0.670473
267,0967@1,6	1	0.109491	-0.668088
Phenylalanine	1	0.0608412	-0.668067
Glyceric acid	1	0.0957225	-0.667315
454.205@0.7	1	0.195664	-0.655764
Xanthine	1	0.159107	-0.650723
308,2709@0,7	1	0.139112	-0.650697
775.549@1.4	1	0.366885	-0.64824
S-Adenosylhomocysteine	1	0.188638	-0.633148
779.58@1.4	1	0.436807	-0.632924
431.053@5.1	1	0.162762	-0.63225
476.974@6.6	1	0.107944	-0.628246
232,1434@3,9	1	0.215493	-0.627104
204.092@4.1	1	0.0713115	-0.625111
361.137@5.1	1	0.117374	-0.624722
Gly Gly Phe	1	0.213789	-0.620642
321.02@6.6	1	0.184429	-0.617424
1alpha,25-dihydroxy-20,26,27-trimethyl-23-oxavitamin D3	1	0.0914556	-0.616946
302,2255@07	1	0.25385	-0.616311
1-Aminocyclopropane-1-carboxylic acid	1	0.233322	-0.615266
NAD	1	0.112016	-0.612653
759.521@1.4	1	0.420155	-0.611801
Proline	1	0.0456636	-0.611045
UDP-N-acetyl-D-galactosamine	1	0.182182	-0.606666
398.997@6.6	1	0.132674	-0.605919
752.243@6.1	1	0.105552	-0.605106
812.677@3.4	1	0.413788	-0.602248
Serine	1	0.174084	-0.600354
GPEtn(O-16:0/22:5(4Z,7Z,10Z,13Z,16Z))	1	0.457331	-0.598138
261.068@3.7	1	0.137994	-0.594126
85.089@4	1	0.128238	-0.593471
426.247@0.7	1	0.101664	-0.592323
335.018@1.3	1	0.149044	-0.588923
Ganglioside GM3 (d18:1/16:0)	1	0.18281	-0.587955
411.03@1.3	1	0.260918	-0.585356
1933.022@1.4	1	0.431494	-0.585098
1005.525@2.9	1	0.38232	-0.58157
947.499@1.4	1	0.42162	-0.580065
488.107@7.9	1	0.261251	-0.577986
164.006@9.5	1	0.195061	-0.571811
343.002@6.6	1	0.15836	-0.570471
myo-Inositol	1	0.251271	-0.559136
260.123@1.1	1	0.489932	-0.557712
SM(d18:1/24:1(15Z))	1	0.448037	-0.552189
718.532@1.6	1	0.425849	-0.551164
185.988@9.5	1	0.202486	-0.551093
n-9,12-(Z,Z)-Octadecadienoic acid methyl ester	1	0.224953	-0.548935
Diaminopimelic acid	1	0.28143	-0.547678
871.573@2.6	1	0.260175	-0.54654
71.074@4.9	1	0.091233	-0.54421
174,1015@6,4	1	0.28212	-0.543724
3-Dehydroquinic acid	1	0.151829	-0.54295
671.822@1.9	1	0.230654	-0.537711
Aspartate	1	0.262211	-0.53768
815.116@8.2	1	0.268807	-0.537496
213.069@4.9	1	0.147334	-0.535672
963.501@1.4	1	0.445243	-0.534922
274.046@6.1	1	0.135771	-0.532695
378.056@4.1	1	0.0608141	-0.532289
Creatine	1	0.173712	-0.528907
305.061@3.9	1	0.0722185	-0.527522
867.088@5.4	1	0.17732	-0.522389
Pyroglutamic acid	1	0.216855	-0.520555
Mannitol	1	0.1463	-0.519735
Lysine	1	0.206116	-0.51949
Threitol	1	0.0930245	-0.518203
Histidine	1	0.194274	-0.513903
GPEtn(18:0/18:1(11Z))	1	0.388187	-0.513787
N-Acetyl-L-Histidine	1	0.31577	-0.512164
437.291@2.9	1	0.277863	-0.511073
532.911@5.9	1	0.2117	-0.50988
69.058@5.4	1	0.204595	-0.508981
337.151@4.5	1	0.208174	-0.508618
216.041@3.8	1	0.220548	-0.508037
145.11@1	1	0.337795	-0.506741
990.343@6.1	1	0.285257	-0.504382
115.065@5.4	1	0.0477621	-0.504287
Glycine	1	0.277298	-0.503962
240.031@3.8	1	0.0801727	-0.503799
507.369@4	1	0.225865	-0.501834
425.35@3.4	1	0.296421	-0.501362
CDP-ethanolamine	1	0.342966	-0.498658
718.535@1.5	1	0.461809	-0.496162
Allantoin	1	0.122043	-0.495653
767.52@2.9	1	0.314357	-0.495032
261.974@9.5	1	0.329017	-0.492012
810.662@3.4	1	0.418971	-0.491674
339,0449@3,7	1	0.055531	-0.489987
449.04@1.9	1	0.333875	-0.489211
261.031@4.9	1	0.202476	-0.488606
926.665@0.7	1	0.232115	-0.483907
734.567@2.9	1	0.471862	-0.481774
694.126@6.3	1	0.248498	-0.479208
277.062@5.1	1	0.0588878	-0.47813
203.115@6.2	1	0.359897	-0.477903
GPEtn(19:0/16:0)[U]	1	0.439572	-0.477212
227.084@3.9	1	0.071466	-0.474274
175.066@1.1	1	0.15801	-0.470987
489.169@6.6	1	0.195724	-0.46728
Tryptophan	1	0.0767616	-0.465021
990.514@1.4	1	0.48701	-0.462208
Tyrosine	1	0.0750997	-0.459689
Panthenol	1	0.153289	-0.457135
875.495@2.6	1	0.325021	-0.456599
Arabinose	1	0.358883	-0.455528
254@1.1	1	0.346284	-0.453789
Isoleucine/Leucine	1	0.0914342	-0.452953
318.008@6.6	1	0.216697	-0.452925
644.811@1.8	1	0.304843	-0.449842
5-Hepten-3-ynoic acid, 7-[[(3,4-dihydro-3,4-dihydroxy-1-naphthalenyl)methyl]amino]-2,2-dimethyl-	1	0.37574	-0.449755
UDP-glucose	1	0.325258	-0.448593
180,0646@6,6	1	0.258745	-0.446999
Fructose	1	0.0726449	-0.444167
1256.439@6.1	1	0.370875	-0.443029
387.309@2.1	1	0.393508	-0.44241
262,0964@1,6	1	0.180662	-0.441716
398.012@6.9	1	0.079778	-0.441648
6alpha-Hydroxy-3-oxo-5beta-cholan-24-oic Acid	1	0.297121	-0.440201
296.152@6.1	1	0.127046	-0.439332
1199.072@2	1	0.380597	-0.439235
855.5@1.1	1	0.506945	-0.437216
817.599@2.6	1	0.340589	-0.433601
569.78@1.9	1	0.203478	-0.432011
Leucine	1	0.16992	-0.431679
SM(d18:1/22:0)	1	0.531116	-0.429768
859.533@1.1	1	0.493677	-0.428432
1197.075@1.9	1	0.397567	-0.427074
519.328@3.8	1	0.405055	-0.425885
Indoleacrylic acid	1	0.0468302	-0.425761
158.069@7.5	1	0.337078	-0.425179
Arginine	1	0.211329	-0.424672
132.024@4.5	1	0.354743	-0.42437
Inosine	1	0.437551	-0.424253
2926.179@1.9	1	0.364027	-0.422658
343.977@9.5	1	0.294705	-0.415745
1039.509@1.4	1	0.528151	-0.412089
786.661@3.4	1	0.537946	-0.411856
502.37@0.7	1	0.481646	-0.40183
720.588@2.9	1	0.423272	-0.400473
215.188@2.3	1	0.510582	-0.399253
1056.9@1.9	1	0.710103	-0.398544
768.548@1.4	1	0.594943	-0.397203
320.035@6.9	1	0.188485	-0.395187
323.017@4.5	1	0.219486	-0.395001
Valine	1	0.179212	-0.391726
Alanine	1	0.390012	-0.38918
1888.036@2	1	0.381148	-0.389157
833.518@1.1	1	0.582954	-0.388541
Methionine	1	0.131545	-0.387548
436.062@1.6	1	0.250944	-0.38619
317,1407@6,1	1	0.327609	-0.38532
857.518@1.1	1	0.545085	-0.384487
102.047@3.7	1	0.438444	-0.379818
Threonine	1	0.156667	-0.379715
2100.045@2	1	0.417318	-0.37837
Mannose	1	0.248693	-0.378189
365.043@5.4	1	0.0891266	-0.377229
782.629@3.4	1	0.58317	-0.377029
217.929@9.5	1	0.362588	-0.375674
1030.361@0.7	1	0.533107	-0.371639
381.074@3.9	1	0.116467	-0.367669
Erythronic acid	1	0.116181	-0.365605
397.034@6.8	1	0.475482	-0.362946
498.18@6.1	1	0.305622	-0.362088
301.297@4	1	0.408123	-0.361158
251.161@0.8	1	0.481667	-0.358576
89.049@6.3	1	0.272892	-0.35674
83.037@6.9	1	0.253036	-0.356018
1700.55@6.1	1	0.43609	-0.354149
765.532@1.4	1	0.634717	-0.349259
135.067@5.1	1	0.496485	-0.344647
249.98@2.3	1	0.487752	-0.339447
Trans-4-Hydroxy-L-proline	1	0.231162	-0.334627
1489.058@1.4	1	0.633717	-0.330517
758.259@6.1	1	0.381344	-0.330355
609.443@0.7	1	0.597616	-0.330082
Flavin adenine dinucleotide (FAD)	1	0.475712	-0.328648
823.574@2.8	1	0.436347	-0.32702
GPEtn(18:1(11Z)/18:1(9Z))[U]	1	0.608863	-0.32439
1889.035@1.9	1	0.430779	-0.324059
552.386@0.7	1	0.594685	-0.317874
Threonine/Homoserine	1	0.487558	-0.314903
812.538@1.2	1	0.592276	-0.313916
663.109@6.6	1	0.458861	-0.31233
1180.501@0.8	1	0.580906	-0.311721
714.056@1.9	1	0.488309	-0.309699
383,038@3,9	1	0.229619	-0.306132
Isoleucine	1	0.349934	-0.304781
397.035@6.8	1	0.506189	-0.301662
Ceramide (d18:1/24:1(15Z))	1	0.654648	-0.301318
Fructose/Mannose/myo-Inositol	1	0.517359	-0.299943
942.512@1.4	1	0.68218	-0.299429
476.001@6.1	1	0.262327	-0.298389
Asparagine	1	0.332256	-0.294231
724.987@0.7	1	0.709376	-0.293387
780.381@0.7	1	0.647231	-0.293094
2036.949@1.4	1	0.68636	-0.292833
514.145@6.1	1	0.262161	-0.292189
753.711@6.1	1	0.564642	-0.292041
839.564@1.2	1	0.691657	-0.29134
752.555@1.4	1	0.701361	-0.290791
2924.184@1.9	1	0.49742	-0.289529
741.53@1.5	1	0.636903	-0.288448
3159.062@2	1	0.488506	-0.286581
771.569@1.5	1	0.69195	-0.284015
941.509@1.4	1	0.696776	-0.279421
Cholesterol	1	0.646486	-0.279045
1159.097@6.1	1	0.367967	-0.275685
299.282@3.6	1	0.57808	-0.268766
Glycerylphosphorylethanolamine	1	0.463448	-0.266012
alpha-Tocopherol	1	0.610058	-0.264502
284.038@1.9	1	0.553497	-0.263107
1032.544@2.8	1	0.630716	-0.262418
2507.048@1.9	1	0.51449	-0.261856
449.187@6.1	1	0.274538	-0.259806
441.052@1.9	1	0.544086	-0.258808
553.98@6.1	1	0.304438	-0.258488
443.049@1.9	1	0.54459	-0.258472
271.962@1.7	1	0.606633	-0.257777
964.275@6.1	1	0.496648	-0.255097
553.05@1.9	1	0.538691	-0.25393
Sorbitol	1	0.319383	-0.252901
555.047@1.9	1	0.543973	-0.251196
Resolvin D1	1	0.619042	-0.249573
327.994@1.1	1	0.558122	-0.249471
Ribose	1	0.372862	-0.249458
781.476@1.4	1	0.701046	-0.247521
496.052@1.9	1	0.560206	-0.247028
388.049@1.9	1	0.561889	-0.24631
280.047@1.8	1	0.558253	-0.246281
322.144@6.1	1	0.380746	-0.245003
390.046@1.9	1	0.566167	-0.24354
731.548@2.8	1	0.657948	-0.242594
551.053@1.9	1	0.557945	-0.240788
1674.031@1.9	1	0.557256	-0.239292
1029.525@2.8	1	0.637731	-0.239243
299.998@4.6	1	0.473096	-0.237183
580.215@6.1	1	0.585144	-0.237001
494.055@1.9	1	0.581636	-0.236027
719.589@2.9	1	0.619047	-0.235829
1890.036@1.9	1	0.557755	-0.235804
Creatinine	1	0.374118	-0.235616
892.496@1.6	1	0.687771	-0.235442
645.605@0.7	1	0.74386	-0.235401
416.06@6.1	1	0.382239	-0.234706
1066.789@0.7	1	0.712929	-0.234419
602.059@1.9	1	0.580894	-0.232971
521.942@1.7	1	0.632746	-0.232571
Famotidine	1	0.587446	-0.230129
836.349@1.9	1	0.570547	-0.228842
2511.045@1.9	1	0.566822	-0.228642
604.056@1.9	1	0.586203	-0.228557
333.924@2.3	1	0.653192	-0.226498
339.04@1.9	1	0.594989	-0.225775
837.547@1.1	1	0.728699	-0.223213
Nervonic acid	1	0.601432	-0.222364
90.978@1.9	1	0.572352	-0.221319
334.087@6.1	1	0.38053	-0.219973
2928.176@1.9	1	0.562832	-0.21975
335.046@1.9	1	0.602676	-0.218947
1056.9@2.1	1	0.651913	-0.217477
1031.541@2.8	1	0.674626	-0.214727
1892.03@1.9	1	0.596942	-0.212107
118.027@2.6	1	0.615368	-0.21159
238,1001@6,1	1	0.457795	-0.210075
556.282@0.8	1	0.590921	-0.20762
706.068@1.9	1	0.61194	-0.207601
1187.091@1.9	1	0.606586	-0.207086
901.509@2.5	1	0.630468	-0.206957
331.927@2.3	1	0.677143	-0.206857
1478.42@6.1	1	0.606783	-0.204643
2517.037@1.9	1	0.613376	-0.202823
838.625@2.6	1	0.684327	-0.201901
1550.156@2.7	1	0.671074	-0.199767
2912.2@1.9	1	0.608342	-0.19808
GPSer(18:0/22:6(4Z,7Z,10Z,13Z,16Z,19Z))	1	0.727871	-0.197849
266.01@1.1	1	0.603855	-0.196924
398.167@2.2	1	0.68137	-0.196233
752.553@1.4	1	0.784054	-0.196006
717.567@2.9	1	0.677873	-0.193609
833.515@1.1	1	0.755954	-0.193069
384.151@2.2	1	0.683044	-0.192967
370.135@2.2	1	0.693614	-0.191407
1019.483@1.4	1	0.777569	-0.191198
926.515@1.4	1	0.79122	-0.187959
925.513@1.4	1	0.789811	-0.187695
1053.524@2.7	1	0.719277	-0.186278
282.062@6.2	1	0.709664	-0.185878
253.949@2.2	1	0.700197	-0.182224
776,5539@0,6	1	0.756204	-0.181816
282.062@6.1	1	0.716753	-0.180741
532.118@6.1	1	0.673244	-0.179955
392.13@6.1	1	0.573405	-0.179829
723.521@1.4	1	0.766699	-0.178639
1104.099@1.9	1	0.682866	-0.177398
Purine	1	0.718842	-0.17581
737.535@1.4	1	0.77701	-0.171642
Phosphatidyl glycerol	1	0.547604	-0.171634
2914.197@1.9	1	0.663824	-0.170883
822.568@2.8	1	0.714108	-0.17038
986.259@6.1	1	0.655368	-0.168361
238.013@9.5	1	0.735483	-0.168134
809.426@2.2	1	0.748622	-0.167823
457.831@6.9	1	0.74057	-0.167429
5-Amino-6-(5'-phosphoribosylamino)uracil	1	0.565579	-0.167029
370.136@1.8	1	0.753259	-0.165215
234.023@1.1	1	0.678611	-0.163996
1057.554@2.7	1	0.752509	-0.157441
1079.54@2.6	1	0.784066	-0.14844
372.027@1	1	0.748926	-0.145388
520.161@6.1	1	0.669372	-0.144149
334.068@6.7	1	0.638078	-0.143217
602.197@6.1	1	0.601718	-0.141388
1109.525@1.1	1	0.812557	-0.137035
412.065@6.1	1	0.618829	-0.135967
Pantothenic Acid	1	0.653261	-0.135615
795.55@2.8	1	0.758239	-0.13321
973.502@1.4	1	0.810993	-0.13284
1003.489@1.4	1	0.841872	-0.132725
588.036@6.4	1	0.788742	-0.1319
917.507@1.5	1	0.835492	-0.127995
758.63@3.5	1	0.848994	-0.126642
GPIns(16:0/18:1(9Z))	1	0.838492	-0.126496
840.491@0.6	1	0.765498	-0.122484
1051.511@2.8	1	0.822185	-0.120085
691.552@2.9	1	0.78001	-0.118713
889.478@1.6	1	0.839818	-0.11707
GPEtn(16:0/22:4(7Z,10Z,13Z,16Z))	1	0.850302	-0.116177
989.293@2.2	1	0.82325	-0.115309
749.536@1.4	1	0.844589	-0.111567
768.55@1.4	1	0.861127	-0.110135
793.904@2.3	1	0.841007	-0.10932
399.335@3.5	1	0.820425	-0.108232
1069.512@2.8	1	0.832935	-0.107928
825.557@0.6	1	0.823382	-0.10744
620.295@1.6	1	0.721408	-0.107409
915.492@1.5	1	0.86168	-0.104325
Fumaric acid	1	0.754034	-0.103512
791.566@2.8	1	0.822308	-0.0998064
358,142@6,1	1	0.772273	-0.0997687
939.494@1.4	1	0.877275	-0.0994093
Acetoacetic acid	1	0.74352	-0.0975431
1008.239@6.1	1	0.803712	-0.096291
1051.507@2.7	1	0.846256	-0.0957114
3-oxo-4-pentenoic acid	1	0.749315	-0.0941868
260.082@6.1	1	0.75179	-0.0936126
859.604@2.6	1	0.848507	-0.0936079
GPnEtn(16:0/18:1(9Z))	1	0.884257	-0.0919696
811.537@0.6	1	0.837274	-0.0917948
1055.539@2.7	1	0.849008	-0.0906153
222.02@5	1	0.772085	-0.0868906
838.552@1.1	1	0.897582	-0.0868749
727.514@2.8	1	0.862509	-0.0866359
1-octadecanoyl-2-(9Z-octadecenoyl)-sn-glycero-3-phosphoserine	1	0.883555	-0.0844015
495.332@3.9	1	0.768167	-0.0825748
472.031@6.1	1	0.771782	-0.0816803
488.078@6.1	1	0.803499	-0.0808879
510.06@6.1	1	0.82497	-0.0802878
702.537@1.5	1	0.89485	-0.0802377
GPSer(18:0/20:4(5Z,8Z,11Z,14Z))	1	0.893509	-0.0796942
797.527@0.6	1	0.855881	-0.0793521
149.999@5	1	0.783777	-0.0774175
910.555@1.1	1	0.904712	-0.0763049
348.052@6.9	1	0.770655	-0.0758869
6-Thioxanthine	1	0.842436	-0.0746608
532.042@6.1	1	0.863119	-0.07111
1053.523@2.8	1	0.899792	-0.0666723
Etn-1-P-Cer(d14:1/18:0)	1	0.885228	-0.065616
GPSer(18:0/18:1(9Z))[U]	1	0.90692	-0.0634635
550.008@6.1	1	0.846957	-0.061487
859.539@2.7	1	0.89709	-0.0587936
787.536@1.2	1	0.92075	-0.0577815
GPGro(18:0/20:4(5Z,8Z,11Z,14Z))	1	0.900877	-0.0573701
721.503@1.4	1	0.924488	-0.0573142
490.042@6.1	1	0.849083	-0.0569552
296.058@6.1	1	0.874519	-0.0567301
770.141@6.1	1	0.881104	-0.0502983
389.022@7.7	1	0.881726	-0.047395
819.616@2.6	1	0.922508	-0.0465951
377.974@5	1	0.891692	-0.043642
912.57@1.1	1	0.948458	-0.0429772
724.524@1.4	1	0.946395	-0.0418254
809.529@3.5	1	0.923132	-0.0416654
753.533@2.8	1	0.932355	-0.039869
991.496@2.8	1	0.939832	-0.0376351
746.604@2.8	1	0.947174	-0.0303214
835.607@2.6	1	0.958062	-0.0272969
318.009@5	1	0.925791	-0.0258077
840.568@1.2	1	0.969559	-0.024729
745.6@2.8	1	0.96058	-0.0214472
318.009@4.6	1	0.947626	-0.018459
395.985@5	1	0.954024	-0.0165872
180.009@5	1	0.962098	-0.0135359
748.159@6.1	1	0.96515	-0.0134736
836.612@2.6	1	0.980264	-0.0128987
765.569@3.5	1	0.976272	-0.0120027
400.229@0.7	1	0.972495	-0.0104413
330.099@2.9	1	0.982645	-0.00934176
Methionine sulfoxide	1	0.996519	-0.00201714
499.96@2.4	1	0.995785	0.00255525
1031.48@1.2	1	0.993381	0.00475914
807.07@2.7	1	0.990338	0.00540832
523.364@3.8	1	0.977587	0.00809702
1-heneicosanoyl-2-(4Z,7Z,10Z,13Z,16Z,19Z-docosahexaenoyl)-sn-glycero-3-phosphoethanolamine	1	0.984042	0.00937119
Glucose	1	0.958117	0.0150339
764.125@6.1	1	0.966734	0.015049
499,2972@0,7	1	0.958477	0.0169089
148.016@0.7	1	0.959019	0.0170378
289.976@6.2	1	0.945951	0.02333
783.502@1.2	1	0.957388	0.0239361
1061.514@1.2	1	0.960912	0.0257069
897.483@1.4	1	0.962212	0.0287841
723.519@1.4	1	0.96196	0.0292386
521.348@3.8	1	0.896574	0.0345341
645.995@6.1	1	0.915788	0.0365977
728.583@3.5	1	0.9405	0.0376238
837.555@2.8	1	0.924684	0.0411201
1071.53@2.8	1	0.934596	0.0430804
837.552@0.6	1	0.916861	0.0432983
1,2-di-(9Z-octadecenoyl)-sn-glycero-3-phospho-(1'-myo-inositol)	1	0.928767	0.0433833
724.522@1.4	1	0.944032	0.0435796
568.018@6.1	1	0.896327	0.0439148
812.537@1.2	1	0.940047	0.0441574
548.275@0.5	1	0.891535	0.0500011
N-Acetyl-a-neuraminic acid	1	0.925996	0.0516356
975.46@1.4	1	0.927675	0.0542115
Cysteine	1	0.859874	0.0566571
794.603@2.6	1	0.893135	0.0574224
135.903@1.9	1	0.911772	0.0626113
5'-Methylthioadenosine	1	0.827639	0.0635702
831.577@2.6	1	0.898076	0.0638987
myo-Inositol-1-phosphate	1	0.932315	0.0681346
898.485@1.4	1	0.900567	0.0759907
GPEtn(16:0/20:4(5Z,8Z,11Z,14Z))	1	0.890602	0.0800415
737.533@1.4	1	0.895953	0.0826898
824.554@0.6	1	0.848708	0.0834814
767.583@2.7	1	0.837025	0.0854154
813.621@2.7	1	0.873938	0.086619
985.495@1.2	1	0.867223	0.088591
429.373@0.8	1	0.830391	0.0891274
715.516@1.5	1	0.864955	0.0912211
253.892@1.3	1	0.793049	0.0947639
793.6@2.6	1	0.825352	0.0988143
810.598@2.6	1	0.845779	0.110524
783.579@2.7	1	0.818603	0.112246
1224.509@3.5	1	0.779562	0.117205
911.498@1.4	1	0.846648	0.1183
771.071@2.8	1	0.787468	0.119842
809.595@2.6	1	0.802143	0.121107
161.105@7.5	1	0.670792	0.121936
1007.481@1.2	1	0.822141	0.125729
674.536@3.6	1	0.656151	0.134972
795.07@2.7	1	0.766721	0.138741
813.548@1.2	1	0.80987	0.149784
760.582@2.8	1	0.759211	0.152219
85.017@1.6	1	0.720014	0.156197
738.543@3.5	1	0.59394	0.16228
974.53@3.5	1	0.666704	0.164526
795.61@2.6	1	0.713064	0.172172
739.554@2.7	1	0.753118	0.178098
427.367@3.4	1	0.708809	0.179808
700.552@3.5	1	0.576923	0.183564
103.1@8.9	1	0.496149	0.184429
Dihydroxyacetone (glycerone)	1	0.569963	0.184847
815.559@1.2	1	0.747489	0.199631
840.493@0.6	1	0.537922	0.202227
793.582@0.6	1	0.671135	0.202291
759.579@2.8	1	0.664406	0.203758
1530.175@2.8	1	0.67973	0.204393
807.579@2.6	1	0.663831	0.206415
869.485@1.2	1	0.657101	0.212984
257,1025@8,0	1	0.370579	0.215886
727.551@1.4	1	0.743504	0.223663
1489.107@2.8	1	0.646022	0.228383
755.546@2.8	1	0.558827	0.233858
GPEtn(18:0/0:0)	1	0.520524	0.257971
Phosphoric acid	1	0.517518	0.262088
GPEtn(13:0/20:0)[U]	1	0.562827	0.263053
GPSer(18:1(9Z)/18:1(9Z))	1	0.577761	0.268676
812.611@2.7	1	0.642858	0.269731
861.553@2.7	1	0.509989	0.271172
GPGro(18:0/18:1(11Z))	1	0.61541	0.271245
796.524@0.6	1	0.495986	0.277797
876.529@3.5	1	0.449393	0.278764
829.562@2.6	1	0.554685	0.279333
1014.524@3.5	1	0.456388	0.280363
N-Acetylgalactosamine 4-sulphate	1	0.617159	0.281107
936.497@3.5	1	0.45102	0.283413
699.519@1.5	1	0.705536	0.284074
888.492@0.6	1	0.479539	0.284416
1597.196@2.7	1	0.519609	0.295039
851.546@2.5	1	0.560956	0.296778
1553.17@2.7	1	0.511241	0.29794
855.577@2.5	1	0.551924	0.298078
794.509@0.6	1	0.432772	0.2988
842,5079@0,6	1	0.350244	0.310831
748.572@3.5	1	0.392759	0.320343
796.078@2.7	1	0.483051	0.330077
1575.17@2.7	1	0.438942	0.336295
762.588@3.5	1	0.348611	0.337561
725.553@3.5	1	0.343632	0.33949
791.584@2.6	1	0.464767	0.339551
796.617@2.7	1	0.496291	0.340319
811.606@2.7	1	0.567554	0.342238
853.562@2.5	1	0.511121	0.347332
781.563@2.7	1	0.416213	0.352608
597.533@0.7	1	0.493869	0.354846
Galabiosylceramide (d18:1/16:0)	1	0.535197	0.366384
760.118@6.9	1	0.49035	0.390789
727.548@1.5	1	0.589923	0.402532
SM(d18:1/18:0)	1	0.456253	0.408892
641.148@8.2	1	0.466547	0.417648
770.509@0.6	1	0.279663	0.419564
821.527@0.6	1	0.276175	0.422314
716.582@3.5	1	0.340619	0.44159
771.607@2.8	1	0.344583	0.457335
573.489@0.7	1	0.352792	0.459328
820.524@0.6	1	0.252251	0.459556
844.522@0.6	1	0.216235	0.459855
702.569@3.5	1	0.238763	0.467452
N-Palmitoylsphingosine	1	0.342531	0.470104
1591.154@2.7	1	0.299043	0.48913
GPGro(18:0/22:6(4Z,7Z,10Z,13Z,16Z,19Z))	1	0.199383	0.512079
772.524@0.6	1	0.196608	0.532461
1572.188@2.7	1	0.296555	0.549139
C18-OH Sulfatide	1	0.169661	0.566543
1595.184@2.7	1	0.224385	0.582654
1525.145@2.8	1	0.206916	0.590551
600.508@0.7	1	0.234974	0.597513
971.495@0.6	1	0.203997	0.603827
766.556@0.6	1	0.209344	0.624715
122,0479@1	1	0.0828241	0.63109
1546.174@2.8	1	0.240649	0.64386
730.598@3.5	1	0.326692	0.650418
1138.491@1.1	1	0.21601	0.669619
GPGro(18:1(9E)/18:1(9E))[U]	1	0.107521	0.694275
600.327@1.8	1	0.0403395	0.76463
576.512@0.6	1	0.11084	0.779817
866.508@0.6	1	0.0248512	0.808725
1592.158@2.7	1	0.0807564	0.914418
1571.183@2.7	1	0.0859409	0.928166
1589.139@2.7	1	0.0752997	0.934962
1570.173@2.7	1	0.0751968	0.939551
1568.159@2.7	1	0.0658579	0.944288
1567.156@2.7	1	0.0699182	0.96691
1518.144@2.8	1	0.116272	0.997702
1543.154@2.8	1	0.0784459	1.0057
1544.159@2.8	1	0.0904066	1.00574
1517.141@2.8	1	0.0990322	1.02036
251.998@6.8	1	0.198815	1.11341

## Sheet: Annotated
Metabolite	local.p.adj	Responder/Non-responder: local.p	Responder/Non-responder: ratio
1,2-di-(9Z-octadecenoyl)-sn-glycero-3-phospho-(1'-myo-inositol)	1	0.928767	0.0433833
1alpha,25-dihydroxy-20,26,27-trimethyl-23-oxavitamin D3	1	0.0914556	-0.616946
1-Aminocyclopropane-1-carboxylic acid	1	0.233322	-0.615266
1-heneicosanoyl-2-(4Z,7Z,10Z,13Z,16Z,19Z-docosahexaenoyl)-sn-glycero-3-phosphoethanolamine	1	0.984042	0.00937119
1-octadecanoyl-2-(9Z-octadecenoyl)-sn-glycero-3-phosphoserine	1	0.883555	-0.0844015
2-amino-4'-hydroxy-Propiophenone	1	0.0210478	-0.743581
3,9,15-Docosatriynoic acid	1	0.100656	-0.670473
3-Dehydroquinic acid	1	0.151829	-0.54295
3-oxo-4-pentenoic acid	1	0.749315	-0.0941868
4,7,10,13-Eicosatetraenoic acid	1	0.0210571	-0.982798
4-phenyl-1,2,3-Thiadiazole	1	0.0410127	-1.02412
5-Amino-6-(5'-phosphoribosylamino)uracil	1	0.565579	-0.167029
5-Hepten-3-ynoic acid, 7-[[(3,4-dihydro-3,4-dihydroxy-1-naphthalenyl)methyl]amino]-2,2-dimethyl-	1	0.37574	-0.449755
5'-Methylthioadenosine	1	0.827639	0.0635702
6alpha-Hydroxy-3-oxo-5beta-cholan-24-oic Acid	1	0.297121	-0.440201
6-Thioxanthine	1	0.842436	-0.0746608
Acetoacetic acid	1	0.74352	-0.0975431
Alanine	1	0.390012	-0.38918
Allantoin	1	0.122043	-0.495653
Allose	1	0.037337	-0.874592
alpha-Tocopherol	1	0.610058	-0.264502
AMP	1	0.200113	-0.738446
Arabinose	1	0.358883	-0.455528
Arginine	1	0.211329	-0.424672
Asparagine	1	0.332256	-0.294231
Asparangine	1	0.11793	-0.793934
Aspartate	1	0.262211	-0.53768
C18-OH Sulfatide	1	0.169661	0.566543
CDP-ethanolamine	1	0.342966	-0.498658
Ceramide (d18:1/24:1(15Z))	1	0.654648	-0.301318
Cholesterol	1	0.646486	-0.279045
Citric acid	1	0.00561379	-1.26157
Creatine	1	0.173712	-0.528907
Creatinine	1	0.374118	-0.235616
Cysteine	1	0.859874	0.0566571
Cysteinyl-cysteine	1	0.0055242	-1.47081
Diaminopimelic acid	1	0.28143	-0.547678
Dihydroxyacetone (glycerone)	1	0.569963	0.184847
Erythronic acid	1	0.116181	-0.365605
Etn-1-P-Cer(d14:1/18:0)	1	0.885228	-0.065616
Famotidine	1	0.587446	-0.230129
Flavin adenine dinucleotide (FAD)	1	0.475712	-0.328648
Fructose	1	0.0726449	-0.444167
Fructose/Mannose/myo-Inositol	1	0.517359	-0.299943
Fumaric acid	1	0.754034	-0.103512
Galabiosylceramide (d18:1/16:0)	1	0.535197	0.366384
Ganglioside GM3 (d18:1/16:0)	1	0.18281	-0.587955
Glucose	1	0.958117	0.0150339
Glutamate	1	0.190355	-0.781332
Glutamic acid	1	0.496638	-0.848066
Glutamine	1	0.0289071	-0.737433
Gly Gly Phe	1	0.213789	-0.620642
Glyceric acid	1	0.0957225	-0.667315
Glycerylphosphorylethanolamine	1	0.463448	-0.266012
Glycine	1	0.277298	-0.503962
GPEtn(13:0/20:0)[U]	1	0.562827	0.263053
GPEtn(16:0/20:4(5Z,8Z,11Z,14Z))	1	0.890602	0.0800415
GPEtn(18:0/0:0)	1	0.520524	0.257971
GPEtn(18:0/18:1(11Z))	1	0.388187	-0.513787
GPEtn(18:0/22:6(4Z,7Z,10Z,13Z,16Z,19Z))	1	0.31502	-0.902251
GPEtn(18:1(11Z)/18:1(9Z))[U]	1	0.608863	-0.32439
GPEtn(19:0/16:0)[U]	1	0.439572	-0.477212
GPEtn(O-16:0/22:5(4Z,7Z,10Z,13Z,16Z))	1	0.457331	-0.598138
GPGro(18:0/18:0)[U]	1	0.298294	-0.93799
GPGro(18:0/18:1(11Z))	1	0.61541	0.271245
GPGro(18:0/20:4(5Z,8Z,11Z,14Z))	1	0.900877	-0.0573701
GPGro(18:0/22:6(4Z,7Z,10Z,13Z,16Z,19Z))	1	0.199383	0.512079
GPGro(18:1(9E)/0:0)[U]	1	0.070379	-0.703811
GPGro(18:1(9E)/18:1(9E))[U]	1	0.107521	0.694275
GPIns(16:0/18:1(9Z))	1	0.838492	-0.126496
GPnEtn(16:0/18:1(9Z))	1	0.884257	-0.0919696
GPSer(18:0/18:1(9Z))[U]	1	0.90692	-0.0634635
GPSer(18:0/20:4(5Z,8Z,11Z,14Z))	1	0.893509	-0.0796942
GPSer(18:0/22:6(4Z,7Z,10Z,13Z,16Z,19Z))	1	0.727871	-0.197849
GPSer(18:1(9Z)/18:1(9Z))	1	0.577761	0.268676
Guanosine	1	0.135172	-0.734795
Histidine	1	0.194274	-0.513903
Hypoxanthine	1	0.198556	-0.725207
Indoleacrylic acid	1	0.0468302	-0.425761
Inosine	1	0.437551	-0.424253
Isocitric acid	1	0.0298064	-0.697527
Isoleucine	1	0.349934	-0.304781
Isoleucine/Leucine	1	0.0914342	-0.452953
L-2-Aminoadipic acid	1	0.130602	-1.00297
Lactic acid	1	0.108189	-0.811985
Leucine	1	0.16992	-0.431679
Lysine	1	0.206116	-0.51949
Mannitol	1	0.1463	-0.519735
Mannose	1	0.248693	-0.378189
Methionine	1	0.131545	-0.387548
Methionine sulfoxide	1	0.996519	-0.00201714
myo-Inositol	1	0.251271	-0.559136
myo-Inositol-1-phosphate	1	0.932315	0.0681346
n-9,12-(Z,Z)-Octadecadienoic acid methyl ester	1	0.224953	-0.548935
N-Acetyl-a-neuraminic acid	1	0.925996	0.0516356
N-Acetylgalactosamine 4-sulphate	1	0.617159	0.281107
N-Acetyl-L-Histidine	1	0.31577	-0.512164
NAD	1	0.112016	-0.612653
Nervonic acid	1	0.601432	-0.222364
N-Palmitoylsphingosine	1	0.342531	0.470104
PA(8:0/8:0)	1	0.00956155	-1.66026
Panthenol	1	0.153289	-0.457135
Pantothenic Acid	1	0.653261	-0.135615
Phenylalanine	1	0.0608412	-0.668067
Phosphatidyl glycerol	1	0.547604	-0.171634
Phosphoric acid	1	0.517518	0.262088
PI(15:1(9Z)/22:6(4Z,7Z,10Z,13Z,16Z,19Z)	1	0.0248512	0.808725
PI(18:0/0:0)	1	0.0403395	0.76463
Proline	1	0.0456636	-0.611045
Purine	1	0.718842	-0.17581
Pyroglutamic acid	1	0.216855	-0.520555
Resolvin D1	1	0.619042	-0.249573
Ribose	1	0.372862	-0.249458
S-Adenosylhomocysteine	1	0.188638	-0.633148
Serine	1	0.174084	-0.600354
SM(d18:1/18:0)	1	0.456253	0.408892
SM(d18:1/22:0)	1	0.531116	-0.429768
SM(d18:1/24:1(15Z))	1	0.448037	-0.552189
Sorbitol	1	0.319383	-0.252901
Taurine	1	0.0351215	-1.05244
Threitol	1	0.0930245	-0.518203
Threonic acid	1	0.10295	-0.723626
Threonine	1	0.156667	-0.379715
Threonine/Homoserine	1	0.487558	-0.314903
Trans-4-Hydroxy-L-proline	1	0.231162	-0.334627
Tryptophan	1	0.0767616	-0.465021
Tyrosine	1	0.0750997	-0.459689
UDP-glucose	1	0.325258	-0.448593
UDP-N-acetyl-D-galactosamine	1	0.182182	-0.606666
Valine	1	0.179212	-0.391726
Xanthine	1	0.159107	-0.650723

## Sheet: Annotated part 2.
The complete list of analyzed and annotated metabolites with a brief description of their biological function.
Metabolite	Function
1,2-di-(9Z-octadecenoyl)-sn-glycero-3-phospho-(1'-myo-inositol)	Lipid
1alpha,25-dihydroxy-20,26,27-trimethyl-23-oxavitamin D3	Lipid
1-Aminocyclopropane-1-carboxylic acid (ACC)	1-aminocyclopropane-1-carboxylic acid (ACC)
1-heneicosanoyl-2-(4Z,7Z,10Z,13Z,16Z,19Z-docosahexaenoyl)-sn-glycero-3-phosphoethanolamine	Lipid
1-octadecanoyl-2-(9Z-octadecenoyl)-sn-glycero-3-phosphoserine	Phosphoserine
3,9,15-Docosatriynoic acid (ALA)	Alpha-linolenic acid (ALA) is a polyunsaturated fatty acid (PUFA).
3-Dehydroquinic acid	A 4-oxo monocarboxylic acid derived from quinic acid by oxidation of the hydroxy group at position 3 to the corresponding keto group.
3-oxo-4-pentenoic acid
5-Amino-6-(5'-phosphoribosylamino)uracil	5-Amino-6-(5'-phosphoribitylamino)uracil is an intermediate in Riboflavin metabolism. 5-Amino-6-(5'-phosphoribitylamino)uracil is the. 3rd to last step in the synthesis of 7-Hydroxy-6-methyl-8-ribityl lumazine and is converted from 5-Amino-6-(5'-phosphoribosylamino)uracil via the enzyme 5-amino-6-(5-phosphoribosylamino)uracil reductase.
5-Hepten-3-ynoic acid
5'-Methylthioadenosine	A naturally occurring sulfur-containing nucleoside present in all mammalian tissues, produced from S-adenosylmethionine through the polyamine biosynthetic pathway.
6alpha-Hydroxy-3-oxo-5beta-cholan-24-oic Acid
6-Thioxanthine	An exogenous substrate of 6-Mercaptopurine (6-MP). Xanthine oxidase (XO) can transform 6-MP into 6-TX. 6-MP is an oral medication that reduce the body's immune responses.
Acetoacetic acid	A weak organic acid produced in the human liver under certain conditions of poor metabolism leading to excessive fatty acid breakdown.It can be partially converted to acetone by decarboxylation and excreted either in urine or through respiration. These compounds serve as an indispensable source of energy for extrahepatic tissues, especially the brain and lung of developing rats. Also, it provides…
Alanine	Alanine is a small non-essential amino acid in humans, Alanine is one of the most widely used for protein construction and is involved in the metabolism of tryptophan and vitamin pyridoxine. Alanine is an important source of energy for muscles and central nervous system, strengthens the immune system, helps in the metabolism of sugars and organic acids, and displays a cholesterol-reducing effect …
Allantoin	A diureide of glyoxylic acid with the chemical formula C4H6N4O3. It is a product of purine metabolism in most mammals except higher apes, and it is present in their urine. In humans, uric acid is excreted instead of allantoin.
alpha-Tocopherol	Vitamin E (alpha tocopherol) is a fat soluble vitamin and potent antioxidant that is believed to be important in protecting cells from oxidative stress, regulating immune function, maintaining endothelial cell integrity and balancing normal coagulation.
AMP	Adenosine monophosphate (AMP) is a nucleoside triphosphate
Arabinose	L-arabinose is a pentose and one of the most abundant components released by complete hydrolysis of non-starch polysaccharides (NSP) of vegetable origin.
Arginine	Arginine is an α-amino acid used in the biosynthesis of proteins
Asparagine	Asparagine encoded by the codons AAU and AAC, is an α-amino acid that is used in the biosynthesis of proteins
Asparangine	α-amino acid
Aspartate	Aspartic acid also known as aspartate, is an α-amino acid that is used in the biosynthesis of proteins
C18-OH Sulfatide	Glycosphingolipid sulfates (also termed sulfatides) are glycosphingolipids carrying a sulfate ester group attached to the carbohydrate moiety. The sulfogalactose moiety of sulfoglycosphingolipids serves as a mimic of tyrosine phosphate in many recognition processes
CDP-ethanolamine	An acidic, sulfated glycosphingolipid. This lipid occurs in membranes of various cell types, but is found in particularly high concentrations in myelin where it constitutes 3-4% of total membrane lipids.
Ceramide (d18:1/24:1(15Z))	Ceramides (N-acylsphingosine) are one of the hydrolysis byproducts of sphingomyelin by the enzyme sphingomyelinase (sphingomyelin phosphorylcholine phosphohydrolase E.C.3.1.4.12) which has been identified in the subcellular fractions of human epidermis (PMID 25935 ) and many other tissues. They can also be synthesized from serine and palmitate in a de novo pathway and are regarded as important ce…
Cholesterol	A compound of the sterol type found in most body tissues. Cholesterol and its derivatives are important constituents of cell membranes and precursors of other steroid compounds.
Creatine	A nitrogenous organic acid that occurs naturally in vertebrates. Its main role is to facilitate recycling of adenosine triphosphate (ATP).
Creatinine	A breakdown product of creatine phosphate in muscle, and is usually produced at a fairly constant rate by the body.
Cysteine	A non-essential sulfur-containing amino acid in humans, related to cystine, Cysteine is important for protein synthesis, detoxification, and diverse metabolic functions.
Diaminopimelic acid	An amino acid, representing an epsilon-carboxy derivative of lysine. DAP is a characteristic of certain cell walls of some bacteria.
Dihydroxyacetone (glycerone)	Dihydroxyacetone (DHA), also known as glycerone, is a simple saccharide (a triose) with formula C 3H 6O 3
Erythronic acid	A sugar component of aqueous humour (eye). It may be derived from glycated proteins or from degradation of ascorbic acid.
Etn-1-P-Cer(d14:1/18:0)	Phosphosphingolipids in which the amino group of a sphingoid base is in amide linkage with one of several fatty acids, while the terminal hydroxy group of the sphingoid base is esterified to phosphorylethanolamine
Famotidine	A propanimidamide and histamine H2-receptor antagonist with antacid activity.
Flavin adenine dinucleotide (FAD)	A condensation product of riboflavin and adenosine diphosphate. The coenzyme of various aerobic dehydrogenases
Fructose	A ketonic monosaccharide found in many plants, where it is often bonded to glucose to form the disaccharide sucrose. It is one of the three dietary monosaccharides, along with glucose and galactose, that are absorbed directly into the bloodstream during digestion
Fructose/Mannose/myo-Inositol	Inositol, hexahydroxycyclohexane, is a six-carbon sugar alcohol
Fumaric acid	A key intermediate in the tricarboxylic acid cycle for organic acid biosynthesis in humans and other mammals. Fumaric acid is also an essential ingredient in plant life.
Galabiosylceramide (d18:1/16:0)	A non-acidic diglycosphingolipids, i.e. a sphingolipid with two or more carbohydrate moieties attached to a ceramide unit. It is a vital component of cellular membranes of most eukaryotic organisms and some bacteria.
Ganglioside GM3 (d18:1/16:0)	A glycosphingolipid (ceramide and oligosaccharide)or oligoglycosylceramide with one or more sialic acids (i.e. n-acetylneuraminic acid) linked on the sugar chain. It is a component the cell plasma membrane which modulates cell signal transduction events.
Glucose	A monosaccharide containing six carbon atoms and an aldehyde group and is therefore referred to as an aldohexose
Glutamate	Glutamate is a key compound in cellular metabolism.
Glutamic acid	also referred to as glutamate; a key compound in cellular metabolism.
Gly Gly Phe
Glyceric acid	A human urinary metabolite present in patients with L-Glyceric aciduria.
Glycerylphosphorylethanolamine	A membrane breakdown product resulting from the cleavage of the lipid group from glycerophosphoethanlomine fatty acids (i.e. phosphatidylethanolamine).
Glycine	Nonessential amino acid in humans, animals, and many mammals. Generally, glycine is synthesized from choline, serine, hydroxyproline, and threonine through interorgan metabolism in which kidneys and liver are the primarily involved.
GPEtn(13:0/20:0)[U]	A phosphatidylethanolamine (PE or GPEtn). It is a glycerophospholipid in which a phosphorylethanolamine moiety occupies a glycerol substitution site. As is the case with diacylglycerols, glycerophosphoethanolamines can have many different combinations of fatty acids of varying lengths and saturation attached at the C-1 and C-2 positions.
GPEtn(16:0/20:4(5Z,8Z,11Z,14Z))	See GPEtn(13:0/20:0)[U]
GPEtn(18:0/0:0)	See GPEtn(13:0/20:0)[U]
GPEtn(18:0/18:1(11Z))	See GPEtn(13:0/20:0)[U]
GPEtn(18:0/22:6(4Z,7Z,10Z,13Z,16Z,19Z))	See GPEtn(13:0/20:0)[U]
GPEtn(18:1(11Z)/18:1(9Z))[U]	See GPEtn(13:0/20:0)[U]
GPEtn(19:0/16:0)[U]	See GPEtn(13:0/20:0)[U]
GPEtn(O-16:0/22:5(4Z,7Z,10Z,13Z,16Z))	See GPEtn(13:0/20:0)[U]
GPGro(18:0/18:0)[U]	A class of glycerophospholipid (PG or GP) in which a phosphorylethanolamine moiety occupies a glycerol substitution site. As is the case with diacylglycerols, glycerophosphocholines can have many different combinations of fatty acids of varying lengths and saturation attached at the SN-1 and SN-2 positions.
GPGro(18:0/18:1(11Z))	See GPGro(18:0/18:0)[U]
GPGro(18:0/20:4(5Z,8Z,11Z,14Z))	See GPGro(18:0/18:0)[U]
GPGro(18:0/22:6(4Z,7Z,10Z,13Z,16Z,19Z))	See GPGro(18:0/18:0)[U]
GPGro(18:1(9E)/0:0)[U]	See GPGro(18:0/18:0)[U]
GPGro(18:1(9E)/18:1(9E))[U]	See GPGro(18:0/18:0)[U]
GPnEtn(16:0/18:1(9Z))	A phosphatidylethanolamine (PE or GPEtn). It is a glycerophospholipid in which a phosphorylethanolamine moiety occupies a glycerol substitution site. As is the case with diacylglycerols, glycerophosphoethanolamines can have many different combinations of fatty acids of varying lengths and saturation attached at the C-1 and C-2 positions.
GPSer(18:0/18:1(9Z))[U]	A phosphatidylserine (PS or GPSer). It is a glycerophospholipid in which a phosphorylserine moiety occupies a glycerol substitution site. As is the case with diacylglycerols, glycerophosphoserines can have many different combinations of fatty acids of varying lengths and saturation attached at the C-1 and C-2 positions.
GPSer(18:0/18:1(9Z)/ 1-octadecanoyl-2-(9Z-octadecenoyl)-sn-glycero-3-phosphoserine	See GPSer(18:0/18:1(9Z))[U]
GPSer(18:0/20:4(5Z,8Z,11Z,14Z))	See GPSer(18:0/18:1(9Z))[U]
GPSer(18:0/22:6(4Z,7Z,10Z,13Z,16Z,19Z))	See GPSer(18:0/18:1(9Z))[U]
GPSer(18:1(9Z)/18:1(9Z))	See GPSer(18:0/18:1(9Z))[U]
Guanosine	A purine nucleoside comprising guanine attached to a ribose (ribofuranose) ring via a β-N9-glycosidic bond. Phosphorylated to become guanosine monophosphate (GMP), cyclic guanosine monophosphate (cGMP), guanosine diphosphate (GDP), and guanosine triphosphate (GTP).
Histidine	Histidine (abbreviated as His or H; encoded by the codons CAU and CAC) is an α-amino acid that is used in the biosynthesis of proteins. It contains an α-amino group (which is in the protonated –NH3+ form under biological conditions), a carboxylic acid group (which is in the deprotonated –COO− form under biological conditions), and an imidazole side chain (which is partially protonated), classifyi…
Hypoxanthine	A purine-based organic compound in human muscle tissues, Hypoxanthine is formed during purine catabolism as a product of xanthine oxidase action on xanthine, and occasionally is found as a constituent of nucleic acids.
Inosine	A nucleoside that is formed when hypoxanthine is attached to a ribose ring via a β-N9-glycosidic bond. Inosine is commonly found in tRNAs and is essential for proper translation of the genetic code in wobble base pairs.
Isoleucine	Leucine and isoleucine, along with valine, make up the branched-chain amino acids. These amino acids contains aliphatic side-chains with a central carbon atom bound to three or more carbon atoms.
Isoleucine/Leucine	See Isoleucine
L-2-Aminoadipic acid	L-alpha-Aminoadipic acid is a lysine metabolite with neuroexcitatory properties
Lactic acid
Leucine	See Isoleucine
Lysine	Lysine is one of nine essential amino acids in humans required for growth and tissue repair,
Mannitol	Crystalline alcohol which is found in many plants and is used in various foods and medical products
Mannose	A sugar of the hexose class which occurs as a component of many natural polysaccharides.
Methionine	A sulphur-containing amino acid which is a constituent of most proteins and is essential to the diet of vertebrates.
Methionine sulfoxide	An amino acid that occurs naturally post-translationally. Oxidation of sulfur of methionine results in methionine sulfoxide or methionine sulfone
Methyl linoleate	A natural methylated form of α-linolenic acid, a polyunsaturated fatty acid (PUFA).
myo-Inositol	A biologically active inositol that is a component of many phospholipids and occurs widely in plants, animals, and microorganisms
myo-Inositol-1-phosphate	Member of the inositol phosphate (InsP) molecular family of second messengers that play a critical role in the transmission of cellular signals
N-Acetyl-a-neuraminic acid
N-Acetylgalactosamine 4-sulphate	Also known as GalNAc4S, this molecule is a key component of dermatan, keratan and chondroitin sulfate. It is also a substrate for the enzyme N-acteylgalactosamine-4-sulphate transferase. This molecule is found in elevated concentrations in the urine of patients suffering from muchopolysaccharidosis type III, IV and VI.
N-Acetyl-L-Histidine	A histidine derivative that is L-histidine having an acetyl substituent on the α-nitrogen
NAD	Nicotinamide adenine dinucleotide: a coenzyme involved in many cellular oxidation-reduction reactions
Nervonic acid	A monounsaturated analog of lignoceric acid (24:0). It is also known as selacholeic acid and cis-15-tetracosenoic acid.
N-Palmitoylsphingosine	Hydrolysis byproducts of sphingomyelin
Panthenol	An alcohol analog of pantothenic acid (vitamin B5)
Pantothenic Acid	A vitamin of the B complex, found in rice, bran, and many other foods, and essential for the oxidation of fats and carbohydrates
Phenylalanine	An amino acid widely distributed in plant proteins. It is an essential nutrient in the diet of vertebrates.
Phosphatidyl glycerol	A glycerophospholipid found in pulmonary surfactant.
Phosphoric acid	A sequestering agent which binds many divalent cations
Purine	a substituted derivative of purine, especially the bases adenine and guanine present in DNA. It is derived a group of compounds including uric acid, xanthine, and caffeine
Pyroglutamic acid	A cyclized derivative of L-glutamic acid. It is an uncommon amino acid derivative in which the free amino group of glutamic acid cyclizes to form a lactam. It is formed nonenzymatically from glutamate, glutamine, and gamma-glutamylated peptides, but it can also be produced by the action of gamma-glutamylcyclotransferase on an L-amino acid.
Resolvin D1	A poly-hydroxyl metabolite of docosahexaenoic acid
Ribose	A sugar of the pentose class which occurs widely in nature as a constituent of nucleosides and several vitamins and enzymes.
S-Adenosylhomocysteine	An amino acid derivative used in several metabolic pathways in most organisms. It is an intermediate in the synthesis of cysteine and adenosine
Serine	A hydrophilic amino acid which is a constituent of most proteins.
SM(d18:1/18:0)	Sphingomyelin is a type of sphingolipid found in animal cell membranes, especially in the membranous myelin sheath which surrounds some nerve cell axons. In humans, sphingomyelin is the only membrane phospholipid not derived from glycerol.
SM(d18:1/22:0)	See SM(d18:1/18:0)
SM(d18:1/24:1(15Z))	See SM(d18:1/18:0)
Sorbitol	A polyhydric alcohol with about half the sweetness of sucrose.
Threitol	The main end product of D-xylose metabolism in hummans. Threitol is a C4-polyol (tetritol); the total C4-polyol concentration of threitol decreases with age.
Threonic acid	Sugar acid or a Sugar acid derivative. Sugar acids are compounds containing a saccharide unit which bears a carboxylic acid group. L-threonic Acid is considered to be soluble (in water) and acidic.
Threonine	A hydrophilic amino acid which is a constituent of most proteins. It is an essential nutrient in the diet of vertebrates.
Threonine/Homoserine	See Threonine. An α-amino acid with the chemical formula HO2CCH(NH2)CH2CH2OH. L-Homoserine is not one of the common amino acids encoded by DNA. It differs from the proteinogenic amino acid serine by insertion of an additional -CH2- unit into the backbone.
Trans-4-Hydroxy-L-proline	Non-proteinogenic amino acid
Tryptophan	An amino acid which is a constituent of most proteins. It is an essential nutrient in the diet of vertebrates.
Tyrosine	A hydrophilic amino acid which is a constituent of most proteins and is important in the synthesis of some hormones.
UDP-glucose	A key intermediate in carbohydrate metabolism. Serves as a precursor of glycogen, can be metabolized into UDPgalactose and UDPglucuronic acid which can then be incorporated into polysaccharides as galactose and glucuronic acid.
UDP-N-acetyl-D-galactosamine	Donor substrate for the glycosyltransferase encoded by the B gene at the human blood group ABO locus
Valine	An amino acid which is a constituent of most proteins. It is an essential nutrient in the diet of vertebrates
Xanthine	A crystalline compound found in blood and urine which is an intermediate in the metabolic breakdown of nucleic acids to uric acid.
